# Supplementary material for: A visible-light-induced bromine radical initiates direct C–H alkylation of heteroaromatics
Source: Royal Society of Chemistry journal article supplement (doi:10.1039/d3ob02047a), 2024-01-01

## *Supporting Information*

### Visible-light-induced bromine radical initiate direct C–H alkylation of heteroaromatic

*Xiangxue Cao,*<sup>a</sup> *Lanfeng Wei,*<sup>\*c</sup> *Jinbo Yang,*<sup>a</sup> *Huanhuan Song,*<sup>\*b</sup> *Yu Wei*<sup>\*a</sup>

- a. School of Chemistry and Chemical Engineering/State Key Laboratory Incubation Base for Green Processing of Chemical Engineering, Shihezi, 832003, China.
- b. Bingtuan Energy Development Institute, Shihezi University, Shihezi, 832003, China.
- c. Xinjiang Key Laboratory of Coal Mine Disaster Intelligent Prevention and Emergency Response, Xinjiang Institute of Engineering, Urumqi 830023, China.

## Table of contents

|                                        |    |
|----------------------------------------|----|
| 1. General considerations .....        | 3  |
| 2. General procedure .....             | 4  |
| 3. Radical inhibition experiment ..... | 5  |
| 4. Characterization data .....         | 6  |
| 5. References.....                     | 15 |
| 6. Copies of NMR spectra .....         | 16 |

## 1. General considerations

**General.** Unless otherwise noted, all reactions were carried out under an air atmosphere. Analytical thin-layer chromatography (TLC) was performed on glass plates coated with 0.25 mm 230–400 mesh silica gel containing a fluorescent indicator. Visualization was accomplished by exposure to a UV lamp. All the products in this article are compatible with standard silica gel chromatography. Column chromatography was performed on silica gel (200–300 mesh). Eluent generally contained ethyl acetate (EA), petroleum ether (PE).

**Structural analysis.** NMR spectra were measured on a Bruker Ascend 400 spectrometer and chemical shifts ( $\delta$ ) are reported in parts per million (ppm).  $^1\text{H}$  NMR spectra were recorded at 400 MHz in NMR solvents and referenced internally to corresponding solvent resonance,  $^{13}\text{C}$  NMR spectra were recorded at 101 MHz,  $^{19}\text{F}$  NMR spectra were recorded at 376 MHz, and referenced to corresponding solvent resonance. Coupling constants are reported in Hz with multiplicities denoted as s (singlet), d (doublet), t (triplet), q (quartet), m (multiplet) and br (broad). Infrared spectra were collected on a Thermo Fisher Nicolet 6700 FT-IR spectrometer using ATR (Attenuated Total Reflectance) method. Absorption maxima ( $\nu$  max) are reported in wavenumbers ( $\text{cm}^{-1}$ ). High resolution mass spectra (HRMS) were acquired on Thermo Scientific LTQ Orbitrap XL with an ESI source. Melting points were measured with a micro-melting point apparatus.

**Materials.** Commercial reagents and solvent were purchased from Adamas, J&K, Energy, Aladdin, Alfa Aesar, Macklin, Organics, TCI, Innochem and used as received unless otherwise stated.

## 2. General procedure

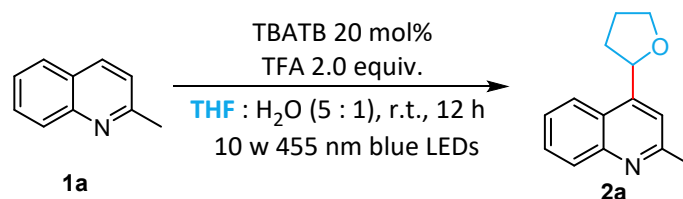

A flame-dried 25 mL quartz reaction tube was placed with a magnetic stir bar. Then, 2-methylquinoline (28.6 mg, 0.2 mmol, 1.0 equiv.), tetrabutylammonium tribromide (19.3 mg, 0.04 mmol, 20.0 mol%), trifluoroacetic acid (45.6 mg, 0.4 mmol, 2.0 equiv.), THF (2.0 mL) and H<sub>2</sub>O (400  $\mu$ L) were added to the tube. The reaction tube was placed on a photocatalytic parallel reactor with Blue LEDs (10 W) at the bottom (**Figure S1**). Then the reaction mixture was stirred and irradiated with the Blue LEDs for 12 hours at room temperature.

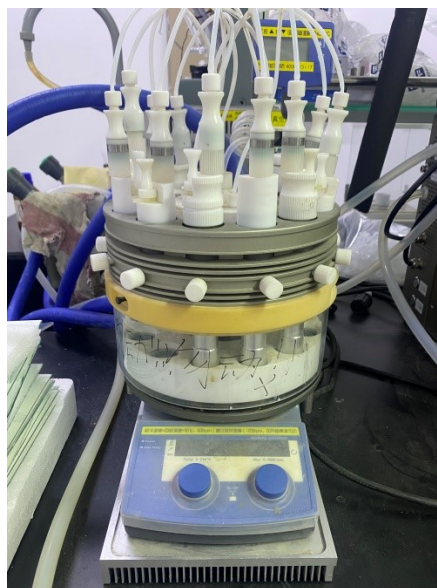

**Figure S1.** Picture of the reactor

After taking the reaction tube out, 10 mL saturated NaHCO<sub>3</sub> solution was added to the reaction mixture. Then, the reaction mixture was extracted with ethyl acetate (3  $\times$  10 mL). The combined organic phase was washed with brine (2  $\times$  5.0 mL) and then dried over anhydrous Na<sub>2</sub>SO<sub>4</sub>. After concentration, the crude product was purified by column chromatography (silica gel) to give the target product, using petroleum ether / ethyl acetate as the eluent.

### 3. Radical inhibition experiment

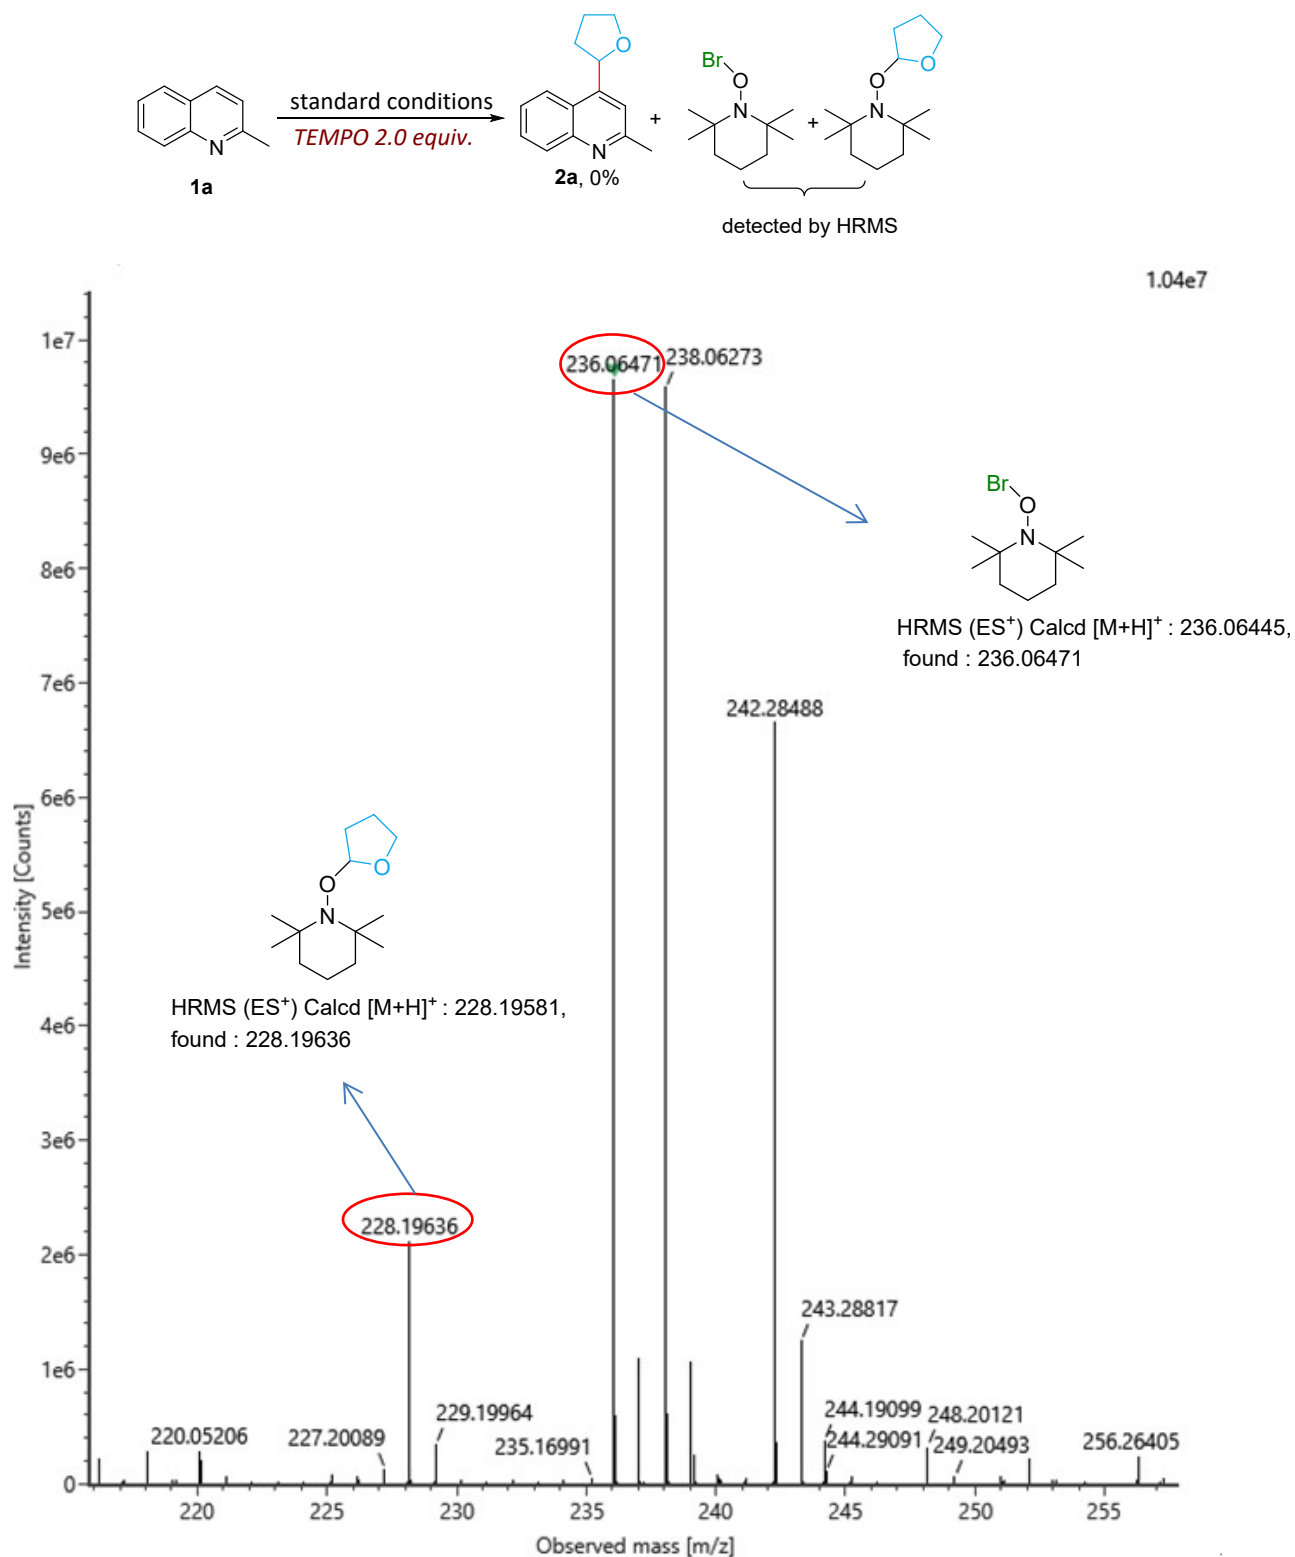

Figure S2. HRMS spectra for Radical inhibition experiment.

## 4. Characterization data

### (2a) 2-Methyl-4-(tetrahydro-2-furanyl)quinolone (CAS: 104293-35-8)<sup>1</sup>

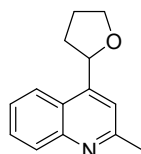

2-methyl-4-(tetrahydrofuran-2-yl)quinolone  
Chemical Formula: C<sub>14</sub>H<sub>15</sub>NO  
Exact Mass: 213.1154  
Molecular Weight: 213.2800

Following the General Procedure A with 2-methylquinoline (28.6 mg, 0.2 mmol), **2a** was obtained as colorless liquid (36.3 mg, 85%),  $R_f = 0.4$  (petroleum ether/ethyl acetate = 4:1).

<sup>1</sup>H NMR (400 MHz, CDCl<sub>3</sub>)  $\delta$  8.05 (d,  $J = 8.4$  Hz, 1H), 7.84 (d,  $J = 8.4$  Hz, 1H), 7.66 (t,  $J = 8.0$  Hz, 1H), 7.49 – 7.44 (m, 2H), 5.58 – 5.55 (m, 1H), 4.25 – 4.21 (m, 1H), 4.06 – 4.01 (m, 1H), 2.74 (s, 3H), 2.64 – 2.56 (m, 1H), 2.11 – 1.96 (m, 2H), 1.87 – 1.79 (m, 1H).

<sup>13</sup>C NMR (101 MHz, CDCl<sub>3</sub>)  $\delta$  159.0, 149.4, 147.8, 129.3, 128.9, 125.5, 123.8, 122.9, 117.2, 76.7, 68.9, 33.8, 25.9, 25.4.

### (2b) 2-Phenyl-4-(tetrahydro-2-furanyl)quinolone (1869978-48-2)<sup>2</sup>

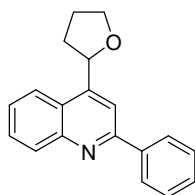

2-phenyl-4-(tetrahydrofuran-2-yl)quinolone  
Chemical Formula: C<sub>19</sub>H<sub>17</sub>NO  
Exact Mass: 275.1310  
Molecular Weight: 275.3510

Following the General Procedure A with 2-phenylquinoline (41.0 mg, 0.2 mmol), **2b** was obtained as colorless oil (40.2 mg, 73%),  $R_f = 0.4$  (petroleum ether/ethyl acetate = 4:1).

<sup>1</sup>H NMR (400 MHz, CDCl<sub>3</sub>)  $\delta$  8.24 – 8.20 (m, 3H), 8.06 (s, 1H), 7.90 (d,  $J = 8.4$  Hz, 1H), 7.74 – 7.70 (m, 1H), 7.56 – 7.52 (m, 3H), 7.49 – 7.45 (m, 1H), 5.68 – 5.64 (m, 1H), 4.31 – 4.25 (m, 1H), 4.11 – 4.05 (m, 1H), 2.70 – 2.61 (m, 1H), 2.13 – 1.98 (m, 2H), 1.94 – 1.86 (m, 1H).

<sup>13</sup>C NMR (101 MHz, CDCl<sub>3</sub>)  $\delta$  157.3, 149.9, 148.3, 139.9, 130.5, 129.2, 129.1, 128.7, 127.6, 126.0, 124.5, 123.0, 114.3, 69.0, 34.0, 26.0.

### (2c) 4-(Tetrahydrofuran-2-yl)quinoline-2-carbaldehyde

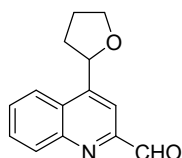

4-(tetrahydrofuran-2-yl)quinoline-2-carbaldehyde  
Chemical Formula: C<sub>14</sub>H<sub>13</sub>NO<sub>2</sub>  
Exact Mass: 227.0946  
Molecular Weight: 227.2630

Following the General Procedure A with quinoline-2-carbaldehyde (31.4 mg, 0.2 mmol), **2c** was obtained as white solid (15.5 mg, 34%),  $R_f = 0.3$  (petroleum ether/ethyl acetate = 5:1).

<sup>1</sup>H NMR (400 MHz, CDCl<sub>3</sub>)  $\delta$  10.22 (s, 1H), 8.27 (d,  $J = 8.4$  Hz, 1H), 8.18 (s, 1H), 8.00 (d,  $J = 8.8$  Hz, 1H), 7.83 – 7.79 (m, 1H), 7.71 – 7.67 (m, 1H), 5.66 – 5.62 (m, 1H), 4.30 – 4.25 (m, 1H), 4.10 – 4.04 (m, 1H), 2.68 – 2.60 (m, 1H), 2.10 – 2.02 (m, 2H), 1.91 – 1.83 (m, 1H).

<sup>13</sup>C NMR 101 MHz, CDCl<sub>3</sub>)  $\delta$  194.0, 152.5, 151.3, 148.0, 131.3, 130.0, 128.9, 127.6, 127.4, 123.5, 112.9, 69.1, 33.9, 26.0.

Melting point (°C): 100.3 – 102.7 °C.

IR: 3375, 3059, 2988, 2955, 2878, 1697, 1593, 1512, 1458, 1360, 1151, 771, 650, 461.  
HRMS (ESI)  $m/z$  calcd for  $C_{14}H_{13}NO_2$   $[M+H]^+$ : 228.10191, found: 228.10185.

**(2d)** 2,6-Dimethyl-4-(tetrahydrofuran-2-yl)quinolone (2378441-92-8)<sup>3</sup>

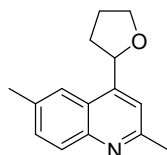

2,6-dimethyl-4-  
(tetrahydrofuran-2-yl)quinolone  
Chemical Formula:  $C_{15}H_{17}NO$   
Exact Mass: 227.1310  
Molecular Weight: 227.3070

Following the General Procedure A with 2,6-dimethylquinoline (31.4 mg, 0.2 mmol), **2d** was obtained as colorless oil (20.0 mg, 44%),  $R_f = 0.2$  (petroleum ether/ethyl acetate = 4:1).

$^1H$  NMR (400 MHz,  $CDCl_3$ )  $\delta$  = 7.94 (d,  $J = 8.4$  Hz, 1H), 7.58 (s, 1H), 7.49 (d,  $J = 8.4$  Hz, 1H), 7.40 (s, 1H), 5.54 (t,  $J = 7.2$  Hz, 1H), 4.24 – 4.19 (m, 1H), 4.06 – 4.00 (m, 1H), 2.71 (s, 3H), 2.63 – 2.56 (m, 1H), 2.52 (s, 3H), 2.12 – 1.95 (m,

2H), 1.87 – 1.78 (m, 1H).

$^{13}C$  NMR (101 MHz,  $CDCl_3$ )  $\delta$  158.0, 148.7, 146.3, 135.2, 131.1, 129.0, 123.8, 122.0, 117.1, 76.7, 68.9, 33.8, 25.9, 25.3, 21.8.

**(2e)** 6-Methoxy-2-methyl-4-(tetrahydrofuran-2-yl)quinolone (2378441-93-9)<sup>4</sup>

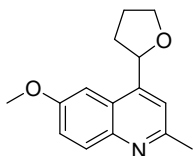

6-methoxy-2-methyl-4-  
(tetrahydrofuran-2-yl)quinolone  
Chemical Formula:  $C_{15}H_{17}NO_2$   
Exact Mass: 243.1259  
Molecular Weight: 243.3060

Following the General Procedure A with 6-methoxy-2-methylquinoline (34.6 mg, 0.2 mmol), **2e** was obtained as white solid (33.6 mg, 69%),  $R_f = 0.1$  (petroleum ether/ethyl acetate = 4:1).

$^1H$  NMR (400 MHz,  $CDCl_3$ )  $\delta$  7.96 (d,  $J = 9.2$  Hz, 1H), 7.40 (s, 1H), 7.33 (dd,  $J = 9.2, 2.4$  Hz, 1H), 7.08 (d,  $J = 2.8$  Hz, 1H), 5.48 (t,  $J = 7.2$  Hz, 1H), 4.25 – 4.19 (m, 1H), 4.06 – 4.00 (m, 1H), 3.91 (s, 3H), 2.70 (s, 3H), 2.63 – 2.55 (m, 1H),

2.11 – 2.05 (m, 1H), 2.04 – 1.96 (m, 1H), 1.89 – 1.82 (m, 1H).

$^{13}C$  NMR (101 MHz,  $CDCl_3$ )  $\delta$  156.9, 156.3, 148.0, 143.7, 130.6, 124.6, 120.6, 117.4, 102.0, 76.8, 68.9, 55.5, 33.4, 25.9, 25.1.

**(2f)** 6-Fluoro-2-methyl-4-(tetrahydrofuran-2-yl)quinolone (2095358-07-7)<sup>4</sup>

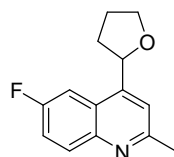

6-fluoro-2-methyl-4-  
(tetrahydrofuran-2-yl)quinolone  
Chemical Formula:  $C_{14}H_{14}FNO$   
Exact Mass: 231.1059  
Molecular Weight: 231.2704

Following the General Procedure A with 6-fluoro-2-methylquinoline (32.2 mg, 0.2 mmol), **2f** was obtained as white solid (24.5 mg, 53%),  $R_f = 0.3$  (petroleum ether/ethyl acetate = 5:1).

$^1H$  NMR (600 MHz,  $CDCl_3$ )  $\delta$  8.02 (dd,  $J = 8.8, 5.6$  Hz, 1H), 7.45 – 7.39 (m, 3H), 5.42 (t,  $J = 7.2$  Hz, 1H), 4.23 – 4.18 (m, 1H), 4.05 – 3.99 (m, 1H), 2.70 (s, 3H), 2.61 – 2.53 (m, 1H), 2.12 – 2.04 (m, 1H), 2.03 – 1.94 (m, 1H), 1.85 – 1.76 (m,

1H).

$^{13}\text{C}$  NMR (101 MHz,  $\text{CDCl}_3$ )  $\delta$  159.7 (d,  $J = 247.2$  Hz), 158.3 (d,  $J = 2.7$  Hz), 148.6 (d,  $J = 5.5$  Hz), 145.0, 131.7 (d,  $J = 9.2$  Hz), 124.4 (d,  $J = 9.3$  Hz), 118.8 (d,  $J = 25.5$  Hz), 117.9, 106.8 (d,  $J = 22.6$  Hz), 76.7, 68.9, 33.6, 25.9, 25.3.  
 $^{19}\text{F}$  NMR (376 MHz,  $\text{CDCl}_3$ )  $\delta$  -113.8.

**(2g)** 6-Chloro-2-methyl-4-(tetrahydrofuran-2-yl)quinolone (2378441-89-3)<sup>4</sup>

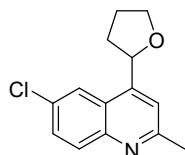

6-chloro-2-methyl-4-(tetrahydrofuran-2-yl)quinoline  
Chemical Formula:  $\text{C}_{14}\text{H}_{14}\text{ClNO}$   
Exact Mass: 247.0764  
Molecular Weight: 247.7220

Following the General Procedure A with 6-chloro-2-methylquinoline (35.5 mg, 0.2 mmol), **2g** was obtained as white solid (34.7 mg, 70%),  $R_f = 0.4$  (petroleum ether/ethyl acetate = 4:1).

$^1\text{H}$  NMR (400 MHz,  $\text{CDCl}_3$ )  $\delta$  7.96 (d,  $J = 9.2$  Hz, 1H), 7.78 (d,  $J = 2.0$  Hz, 1H), 7.58 (dd,  $J = 8.8, 2.0$  Hz, 1H), 7.44 (s, 1H), 5.45 (t,  $J = 7.2$  Hz, 1H), 4.20 (dd,  $J = 13.6, 7.6$  Hz, 1H), 4.03 (dd,  $J = 14.8, 7.2$  Hz, 1H), 2.71 (s, 3H), 2.64 – 2.55 (m, 1H), 2.14 – 2.05 (m, 1H), 2.04 – 1.95 (m, 1H), 1.85 – 1.76 (m, 1H).  
 $^{13}\text{C}$  NMR (101 MHz,  $\text{CDCl}_3$ )  $\delta$  159.4, 148.5, 146.2, 131.2, 130.9, 129.7, 124.6, 122.1, 118.0, 76.5, 68.9, 33.8, 25.9, 25.4.

**(2h)** 6-Bromo-2-methyl-4-(tetrahydrofuran-2-yl)quinolone (2095358-06-6)<sup>4</sup>

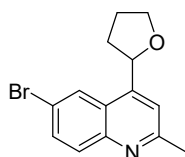

6-bromo-2-methyl-4-(tetrahydrofuran-2-yl)quinoline  
Chemical Formula:  $\text{C}_{14}\text{H}_{14}\text{BrNO}$   
Exact Mass: 291.0259  
Molecular Weight: 292.1760

Following the General Procedure A with 6-bromo-2-methylquinoline (44.4 mg, 0.2 mmol), **2h** was obtained as white solid (43.8 mg, 75%),  $R_f = 0.2$  (petroleum ether/ethyl acetate = 4:1).

$^1\text{H}$  NMR (400 MHz,  $\text{CDCl}_3$ )  $\delta$  7.97 (d,  $J = 2.0$  Hz, 1H), 7.89 (d,  $J = 9.2$  Hz, 1H), 7.71 (dd,  $J = 8.8, 2.0$  Hz, 1H), 7.44 (s, 1H), 5.45 (t,  $J = 7.2$  Hz, 1H), 4.23–4.17 (m, 1H), 4.02 (dd,  $J = 15.2, 7.2$  Hz, 1H), 2.70 (s, 3H), 2.64 – 2.54 (m, 1H), 2.13 – 2.05 (m, 1H), 2.03 – 1.95 (m, 1H), 1.85 – 1.76 (m, 1H).  
 $^{13}\text{C}$  NMR (101 MHz,  $\text{CDCl}_3$ )  $\delta$  159.5, 148.5, 146.4, 132.3, 131.0, 125.4, 125.1, 119.4, 118.0, 76.5, 68.9, 33.8, 25.9, 25.4.

**(2i)** 7-Chloro-2-methyl-4-(tetrahydrofuran-2-yl)quinolone (1821239-62-6)<sup>4</sup>

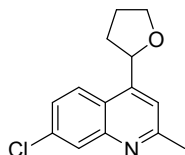

7-chloro-2-methyl-4-(tetrahydrofuran-2-yl)quinoline  
Chemical Formula:  $\text{C}_{14}\text{H}_{14}\text{ClNO}$   
Exact Mass: 247.0764  
Molecular Weight: 247.7220

Following the General Procedure A with 7-chloro-2-methylquinoline (35.5 mg, 0.2 mmol), **2i** was obtained as white solid (26.3 mg, 53%),  $R_f = 0.4$  (petroleum ether/ethyl acetate = 4:1).

$^1\text{H}$  NMR (400 MHz,  $\text{CDCl}_3$ )  $\delta$  8.03 (d,  $J = 1.6$  Hz, 1H), 7.77 (d,  $J = 8.8$  Hz, 1H), 7.43 – 7.40 (m, 2H), 5.49 (t,  $J = 7.2$  Hz, 1H), 4.20 (dd,  $J = 14.0, 8.0$  Hz, 1H), 4.02 (dd,  $J = 15.2, 7.2$  Hz, 1H), 2.71 (s, 3H), 2.61 – 2.53 (m, 1H), 2.12 – 2.04 (m, 1H), 2.03 – 1.95 (m, 1H), 1.84 – 1.75 (m, 1H).



$^{13}\text{C}$  NMR (101 MHz,  $\text{CDCl}_3$ )  $\delta$  160.3, 149.4, 148.4, 134.8, 128.3, 126.3, 124.3, 122.3, 117.4, 76.6, 69.0, 33.8, 25.9, 25.5.

**(2j)** 8-Chloro-2-methyl-4-(tetrahydrofuran-2-yl)quinolone (2378441-96-2)<sup>4</sup>

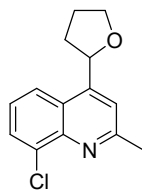

8-chloro-2-methyl-4-(tetrahydrofuran-2-yl)quinolone  
Chemical Formula:  $\text{C}_{14}\text{H}_{14}\text{ClNO}$   
Exact Mass: 247.0764  
Molecular Weight: 247.7220

Following the General Procedure A with 8-chloro-2-methylquinoline (35.5 mg, 0.2 mmol), **2j** was obtained as white solid (27.2 mg, 55%),  $R_f = 0.5$  (petroleum ether/ethyl acetate = 5:1).

$^1\text{H}$  NMR (400 MHz,  $\text{CDCl}_3$ )  $\delta$  7.80 – 7.76 (m, 2H), 7.51 (s, 1H), 7.39 (t,  $J = 8.0$  Hz, 1H), 5.54 (t,  $J = 7.2$  Hz, 1H), 4.23 (q,  $J = 7.6$  Hz, 1H), 4.04 (q,  $J = 7.2$  Hz, 1H), 2.82 (s, 3H), 2.64 – 2.56 (m, 1H), 2.13 – 2.05 (m, 1H), 2.04 – 1.95 (m, 1H), 1.86 – 1.77 (m, 1H).

$^{13}\text{C}$  NMR (101 MHz,  $\text{CDCl}_3$ )  $\delta$  160.2, 149.7, 144.2, 133.5, 129.1, 125.3, 125.2, 122.1, 118.1, 76.7, 69.0, 33.9, 25.93, 25.91.

**(2k)** 8-Bromo-2-methyl-4-(tetrahydrofuran-2-yl)quinolone (2378441-97-3)<sup>4</sup>

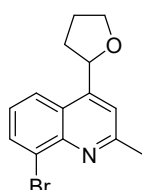

8-bromo-2-methyl-4-(tetrahydrofuran-2-yl)quinolone  
Chemical Formula:  $\text{C}_{14}\text{H}_{14}\text{BrNO}$   
Exact Mass: 291.0259  
Molecular Weight: 292.1760

Following the General Procedure A with 8-bromo-2-methylquinoline (44.4 mg, 0.2 mmol), **2k** was obtained as white solid (39.7 mg, 68%),  $R_f = 0.5$  (petroleum ether/ethyl acetate = 5:1).

$^1\text{H}$  NMR (400 MHz,  $\text{CDCl}_3$ )  $\delta$  7.99 (d,  $J = 7.6$  Hz, 1H), 7.80 (d,  $J = 8.4$  Hz, 1H), 7.48 (s, 1H), 7.30 (t,  $J = 8.4$  Hz, 1H), 5.53 (t,  $J = 7.2$  Hz, 1H), 4.20 (dd,  $J = 15.2, 8.0$  Hz, 1H), 4.02 (q,  $J = 9.6$  Hz, 1H), 2.80 (s, 3H), 2.62 – 2.55 (m, 1H), 2.10 – 2.05 (m, 1H), 2.02 – 1.95 (m, 1H), 1.83 – 1.77

(m, 1H).

$^{13}\text{C}$  NMR (101 MHz,  $\text{CDCl}_3$ )  $\delta$  160.4, 149.7, 145.0, 132.7, 125.7, 125.22, 125.18, 122.8, 118.1, 76.7, 69.0, 34.0, 25.9, 26.0.

**(2l)** 4,7-Dichloro-2-(tetrahydrofuran-2-yl)quinolone (2306793-11-1)<sup>1</sup>

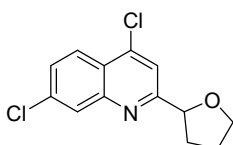

4,7-dichloro-2-(tetrahydrofuran-2-yl)quinolone  
Chemical Formula:  $\text{C}_{13}\text{H}_{11}\text{Cl}_2\text{NO}$   
Exact Mass: 267.0218  
Molecular Weight: 268.1370

Following the General Procedure A with 4,7-dichloroquinoline (39.6 mg, 0.2 mmol), **2l** was obtained as colorless oil (33.2 mg, 62%),  $R_f = 0.1$  (petroleum ether/ethyl acetate = 4:1).

$^1\text{H}$  NMR (400 MHz,  $\text{CDCl}_3$ )  $\delta$  8.12 (d,  $J = 9.2$  Hz, 1H), 8.06 (s, 1H), 7.70 (s, 1H), 7.55 – 7.52 (m, 1H), 5.14 – 5.11 (m, 1H), 4.17 – 4.11 (m, 1H), 4.06 – 4.00 (m, 1H), 2.55 – 2.47 (m, 1H), 2.09 – 1.99 (m, 3H).

$^{13}\text{C}$  NMR (101 MHz,  $\text{CDCl}_3$ )  $\delta$  165.1, 148.5, 143.4, 136.5, 128.1, 128.0, 125.4, 124.0, 118.4, 81.2, 69.3, 33.2, 25.8.

**(2m)** 4-(Tetrahydrofuran-2-yl)-2,2'-biquinoline

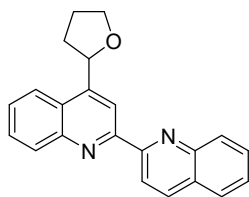

4-(tetrahydrofuran-2-yl)-2,2'-biquinoline  
Chemical Formula: C<sub>22</sub>H<sub>18</sub>N<sub>2</sub>O  
Exact Mass: 326.1419  
Molecular Weight: 326.3990

Following the General Procedure A with 2,2'-biquinoline (51.3 mg, 0.2 mmol), **2m** was obtained as yellow oil (26.8 mg, 41%),  $R_f = 0.6$  (petroleum ether/ethyl acetate = 4:1).

<sup>1</sup>H NMR (400 MHz, CDCl<sub>3</sub>) δ 8.96 (s, 1H), 8.84 (d,  $J = 8.8$  Hz, 1H), 8.33 – 8.28 (m, 3H), 8.0 (d,  $J = 8.4$  Hz, 1H), 7.88 (d,  $J = 8.0$  Hz, 1H), 7.77 – 7.74 (m, 2H), 7.60 – 7.56 (m, 2H), 5.69 (t,  $J = 7.2$  Hz, 1H), 4.39 (q,  $J = 14.4$  Hz, 1H), 4.13 (q,  $J = 14.8$  Hz, 1H), 2.71 – 2.63 (m, 1H), 2.17 – 2.10 (m, 2H), 2.05 – 1.97 (m, 1H).

<sup>13</sup>C NMR (101 MHz, CDCl<sub>3</sub>) δ 156.4, 156.2, 149.8, 148.1, 148.0, 136.6, 130.8, 130.1, 129.4, 129.0, 128.4, 127.6, 126.9, 126.7, 125.9, 123.4, 119.5, 114.9, 77.4, 69.0, 33.8, 26.1.

IR: 2960, 2926, 2853, 1462, 1261, 1094, 1018, 800.

HRMS (ESI)  $m/z$  calcd for C<sub>22</sub>H<sub>18</sub>N<sub>2</sub>O [M+H]<sup>+</sup>: 327.14919, found: 327.14893.

**(2n)** 4-Chloro-1-(tetrahydrofuran-2-yl)isoquinoline

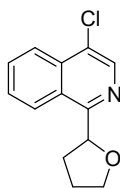

4-chloro-1-(tetrahydrofuran-2-yl)isoquinoline  
Chemical Formula: C<sub>13</sub>H<sub>12</sub>ClNO  
Exact Mass: 233.0607  
Molecular Weight: 233.6950

Following the General Procedure A with 4-chloroisoquinoline (37.2 mg, 0.2 mmol), **2n** was obtained as yellow oil (29.0 mg, 62%),  $R_f = 0.5$  (petroleum ether/ethyl acetate = 4:1).

<sup>1</sup>H NMR (400 MHz, CDCl<sub>3</sub>) δ 8.54 (s, 1H), 8.37 (d,  $J = 8.4$  Hz, 1H), 8.23 (d,  $J = 8.4$  Hz, 1H), 7.80 (t,  $J = 8.0$  Hz, 1H), 7.67 (t,  $J = 8.0$  Hz, 1H), 5.68 (t,  $J = 7.2$  Hz, 1H), 4.18 – 4.12 (m, 1H), 4.05 – 3.99 (m, 1H), 2.56 – 2.48 (m, 1H), 2.42 – 2.36 (m, 1H), 2.20 – 2.07 (m, 2H).

<sup>13</sup>C NMR (101 MHz, CDCl<sub>3</sub>) δ 158.5, 140.1, 133.9, 130.9, 127.9, 127.4, 125.6, 123.9, 78.7, 69.0, 30.6, 26.1.

IR: 3080, 3074, 3045, 2962, 2925, 2856, 1618, 1569, 1257, 1055, 966, 763, 675.

HRMS (ESI)  $m/z$  calcd for C<sub>13</sub>H<sub>12</sub>ClNO [M+H]<sup>+</sup>: 234.06802, found: 234.06842.

**(2o)** 4-Bromo-1-(tetrahydrofuran-2-yl)isoquinoline (2408961-61-3)<sup>5</sup>

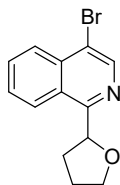

4-bromo-1-(tetrahydrofuran-2-yl)isoquinoline  
Chemical Formula: C<sub>13</sub>H<sub>12</sub>BrNO  
Exact Mass: 277.0102  
Molecular Weight: 278.1490

Following the General Procedure A with 4-bromoisoquinoline (41.6 mg, 0.2 mmol), **2o** was obtained as yellow oil (41.2 mg, 74%),  $R_f = 0.5$  (petroleum ether/ethyl acetate = 4:1).

<sup>1</sup>H NMR (400 MHz, CDCl<sub>3</sub>) δ 8.67 (s, 1H), 8.34 (d,  $J = 8.4$  Hz, 1H), 8.18 (d,  $J = 8.8$  Hz, 1H), 7.77 (t,  $J = 7.2$  Hz, 1H), 7.65 (t,  $J = 8.0$  Hz, 1H), 5.66 (t,  $J = 7.2$  Hz, 1H), 4.17 – 4.11 (m, 1H), 4.04 – 3.99 (m, 1H), 2.56 – 2.47 (m, 1H),

2.42 – 2.33 (m, 1H), 2.20 – 2.04 (m, 2H).

$^{13}\text{C}$  NMR (101 MHz,  $\text{CDCl}_3$ )  $\delta$  159.1, 143.0, 135.0, 131.1, 128.0, 127.8, 126.6, 125.6, 119.2, 78.6, 69.0, 30.5, 26.0.

**(2p)** 5-Bromo-1-(tetrahydrofuran-2-yl)isoquinoline (2095358-00-0)<sup>5</sup>

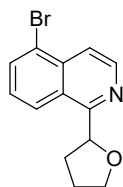

5-bromo-1-(tetrahydrofuran-2-yl)  
isoquinoline

Chemical Formula:  $\text{C}_{13}\text{H}_{12}\text{BrNO}$   
Exact Mass: 277.0102  
Molecular Weight: 278.1490

Following the General Procedure A with 5-bromoisoquinoline (41.6 mg, 0.2 mmol), **2p** was obtained as colorless oil (31.7 mg, 57%),  $R_f = 0.4$  (petroleum ether/ethyl acetate = 4:1).

$^1\text{H}$  NMR (400 MHz,  $\text{CDCl}_3$ )  $\delta$  8.59 (d,  $J = 5.5$  Hz, 1H), 8.34 (d,  $J = 8.4$  Hz, 1H), 7.95 (d,  $J = 6.4$  Hz, 2H), 7.44 (t,  $J = 8.4$  Hz, 1H), 5.70 (t,  $J = 7.2$  Hz, 1H), 4.18 – 4.12 (m, 1H), 4.05 – 3.99 (m, 1H), 2.59 – 2.50 (m, 1H), 2.43 – 2.34 (m, 1H), 2.20 – 2.06 (m, 2H).

$^{13}\text{C}$  NMR (101 MHz,  $\text{CDCl}_3$ )  $\delta$  160.0, 142.7, 135.6, 133.6, 127.7, 127.4, 125.1, 122.2, 119.4, 79.0, 69.0, 30.6, 26.0.

**(2q)** 4-(Tetrahydrofuran-2-yl)isoquinoline-5-carbaldehyde

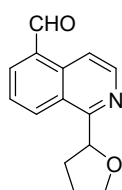

1-(tetrahydrofuran-2-yl)isoquinoline  
-5-carbaldehyde

Chemical Formula:  $\text{C}_{14}\text{H}_{13}\text{NO}_2$   
Exact Mass: 227.0946  
Molecular Weight: 227.2630

Following the General Procedure A with isoquinoline-5-carbaldehyde (31.4 mg, 0.2 mmol), **2q** was obtained as colorless oil (11.8 mg, 26%),  $R_f = 0.2$  (petroleum ether/ethyl acetate = 4:1).

$^1\text{H}$  NMR (400 MHz,  $\text{CDCl}_3$ )  $\delta$  10.39 (s, 1H), 8.97 (d,  $J = 6.0$  Hz, 1H), 8.72 – 8.66 (m, 2H), 8.19 (d,  $J = 7.2$  Hz, 1H), 7.78 (t,  $J = 8.0$  Hz, 1H), 5.71 (t,  $J = 7.2$  Hz, 1H), 4.18 – 4.12 (m, 1H), 4.06 – 4.00 (m, 1H), 2.67 – 2.58 (m, 1H), 2.42 – 2.36 (m, 1H), 2.23 – 2.09 (m, 2H).

$^{13}\text{C}$  NMR (101 MHz,  $\text{CDCl}_3$ )  $\delta$  192.6, 159.8, 144.6, 139.1, 134.2, 132.5, 130.8, 126.8, 126.1, 117.2, 79.4, 69.0, 30.2, 26.1.

Melting point ( $^\circ\text{C}$ ): 155.6 – 108.0  $^\circ\text{C}$ .

IR: 2989, 2987, 2964, 2879, 2750, 1678, 1564, 1225, 1180, 1057, 852, 769, 660.

HRMS (ESI)  $m/z$  calcd for  $\text{C}_{14}\text{H}_{13}\text{N}_2\text{O}$   $[\text{M}+\text{H}]^+$ : 228.10191, found: 228.10199.

**(2r)** 6-Chloro-1-(tetrahydrofuran-2-yl)isoquinoline (2095357-99-4)<sup>5</sup>

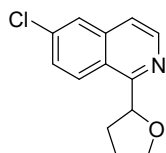

6-chloro-1-(tetrahydrofuran-2-yl)  
isoquinoline

Chemical Formula:  $\text{C}_{13}\text{H}_{12}\text{ClNO}$   
Exact Mass: 233.0607  
Molecular Weight: 233.6950

Following the General Procedure A with 6-chloroisoquinoline (32.7 mg, 0.2 mmol), **2r** was obtained as yellow oil (15.0 mg, 32%),  $R_f = 0.4$  (petroleum ether/ethyl acetate = 4:1).

$^1\text{H}$  NMR (400 MHz,  $\text{CDCl}_3$ )  $\delta$  8.50 (d,  $J = 5.6$  Hz, 1H), 8.32 (d,  $J = 8.8$  Hz, 1H), 7.81 (s, 1H), 7.54 (d,  $J = 9.2$  Hz, 1H), 7.50 (d,  $J = 5.6$  Hz, 1H), 5.65 (t,  $J = 6.8$  Hz, 1H), 4.19

– 4.13 (m, 1H), 4.05 – 4.00 (m, 1H), 2.57 – 2.48 (m, 1H), 2.43 – 2.35 (m, 1H), 2.22 – 2.07 (m, 2H).

$^{13}\text{C}$  NMR (101 MHz,  $\text{CDCl}_3$ )  $\delta$  159.7, 142.4, 137.4, 136.2, 128.1, 127.3, 126.0, 124.8, 119.7, 79.2, 69.0, 30.6, 26.1.

**(2s)** 6-Bromo-1-(tetrahydrofuran-2-yl)isoquinoline (2095357-98-3)<sup>6</sup>

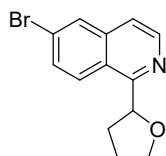

6-bromo-1-(tetrahydrofuran-2-yl)  
isoquinoline  
Chemical Formula:  $\text{C}_{13}\text{H}_{12}\text{BrNO}$   
Exact Mass: 277.0102  
Molecular Weight: 278.1490

Following the General Procedure A with 6-bromoisoquinoline (41.6 mg, 0.2 mmol), **2s** was obtained as white solid (39.5 mg, 71%),  $R_f = 0.2$  (petroleum ether/ethyl acetate = 4:1).

$^1\text{H}$  NMR (400 MHz,  $\text{CDCl}_3$ )  $\delta$  8.49 (d,  $J = 5.6$  Hz, 1H), 8.23 (d,  $J = 9.2$  Hz, 1H), 7.97 (d,  $J = 1.2$  Hz, 1H), 7.67 – 7.64 (m, 1H), 7.47 (d,  $J = 6.0$  Hz, 1H), 5.63 (t,  $J = 7.2$  Hz, 1H), 4.17 – 4.11 (m, 1H), 4.04 – 3.98 (m, 1H), 2.56 – 2.48 (m, 1H), 2.41 – 2.33 (m, 1H), 2.19 – 2.06 (m, 2H).

$^{13}\text{C}$  NMR (101 MHz,  $\text{CDCl}_3$ )  $\delta$  159.8, 142.4, 137.7, 130.6, 129.3, 127.2, 125.0, 124.6, 119.4, 79.1, 69.0, 30.5, 26.0.

**(2t)** 7-Bromo-1-(tetrahydrofuran-2-yl)isoquinoline (2095358-02-2)<sup>6</sup>

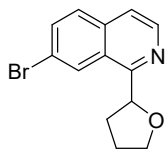

7-bromo-1-(tetrahydrofuran-2-yl)  
isoquinoline  
Chemical Formula:  $\text{C}_{13}\text{H}_{12}\text{BrNO}$   
Exact Mass: 277.0102  
Molecular Weight: 278.1490

Following the General Procedure A with 7-bromoisoquinoline (41.6 mg, 0.2 mmol), **2t** was obtained as white solid (31.2 mg, 56%),  $R_f = 0.3$  (petroleum ether/ethyl acetate = 4:1).

$^1\text{H}$  NMR (400 MHz,  $\text{CDCl}_3$ )  $\delta$  8.53 – 8.50 (m, 2H), 7.75 – 7.68 (m, 2H), 7.54 (d,  $J = 6.0$  Hz, 1H), 5.60 (t,  $J = 7.2$  Hz, 1H), 4.18 – 4.13 (m, 1H), 4.06 – 4.00 (m, 1H), 2.58 – 2.50 (m, 1H), 2.42 – 2.34 (m, 1H), 2.22 – 2.07 (m, 2H).

$^{13}\text{C}$  NMR (100 MHz,  $\text{CDCl}_3$ )  $\delta$  158.6, 141.7, 134.9, 133.3, 128.8, 127.8, 127.5, 120.9, 120.1, 79.0, 68.9, 30.4, 26.0.

**(2u)** Methyl 1-(tetrahydrofuran-2-yl)isoquinoline-3-carboxylate (2095358-05-5)<sup>6</sup>

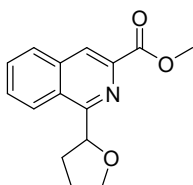

methyl 1-(tetrahydrofuran-2-yl)  
isoquinoline-3-carboxylate  
Chemical Formula:  $\text{C}_{15}\text{H}_{15}\text{NO}_3$   
Exact Mass: 257.1052  
Molecular Weight: 257.2890

Following the General Procedure A with methyl isoquinoline-3-carboxylate (37.4 mg, 0.2 mmol), **2u** was obtained as white solid (27.3 mg, 53%),  $R_f = 0.3$  (petroleum ether/ethyl acetate = 4:1).

$^1\text{H}$  NMR (400 MHz,  $\text{CDCl}_3$ )  $\delta$  8.52 – 8.50 (m, 2H), 7.98 – 7.95 (m, 1H), 7.77 – 7.71 (m, 2H), 5.68 (t,  $J = 7.2$  Hz, 1H), 4.17 (dd,  $J = 14.8, 7.6$  Hz, 1H), 4.06 – 4.00 (m, 4H), 2.74 – 2.65 (m, 1H), 2.47 – 2.38 (m, 1H), 2.27 – 2.08 (m, 2H).

$^{13}\text{C}$  NMR (101 MHz,  $\text{CDCl}_3$ )  $\delta$  166.4, 160.0, 139.9, 136.4, 130.6, 129.3, 128.8, 128.1, 126.1, 124.2, 80.4, 69.0, 52.7, 30.3, 26.1.

**(2v)** 6-(Tetrahydrofuran-2-yl)phenanthridine (1588454-61-8)<sup>5</sup>

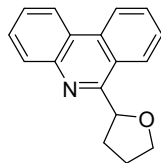

6-(tetrahydrofuran-2-yl)  
phenanthridine  
Chemical Formula: C<sub>17</sub>H<sub>15</sub>NO  
Exact Mass: 249.1154  
Molecular Weight: 249.3130

Following the General Procedure A with phenanthridine (35.8 mg, 0.2 mmol), **2v** was obtained as colorless oil (30.4 mg, 61%), *R<sub>f</sub>* = 0.6 (petroleum ether/ethyl acetate = 4:1).

<sup>1</sup>H NMR (400 MHz, CDCl<sub>3</sub>) δ 8.63 (d, *J* = 8.4 Hz, 1H), 8.54 (d, *J* = 8.0 Hz, 1H), 8.45 (d, *J* = 8.4 Hz, 1H), 8.21 (d, *J* = 8.0 Hz, 1H), 7.82 (t, *J* = 7.2 Hz, 1H), 7.74 – 7.62 (m, 3H), 5.78 (t, *J* = 6.8 Hz, 1H), 4.24 – 4.19 (m, 1H), 4.10 – 4.05 (m, 1H), 2.79 – 2.71 (m, 1H), 2.47 – 2.38 (m, 1H), 2.23 – 2.18 (m, 1H), 2.16 – 2.10 (m, 1H).

<sup>13</sup>C NMR (101 MHz, CDCl<sub>3</sub>) δ 159.2, 143.1, 133.2, 130.32, 130.26, 128.4, 127.1, 126.8, 126.4, 124.7, 124.0, 122.3, 121.8, 79.5, 69.0, 30.0, 25.9.

**(2w)** 2-Chloro-3-(tetrahydrofuran-2-yl)quinoxaline (2770705-43-4)<sup>5</sup>

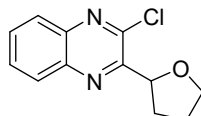

Chemical Formula: C<sub>12</sub>H<sub>11</sub>ClN<sub>2</sub>O  
Exact Mass: 234.0560  
Molecular Weight: 234.6830

Following the General Procedure A with 2-chloroquinoxaline (32.9 mg, 0.2 mmol), **2w** was obtained as colorless oil (21.6 mg, 46%), *R<sub>f</sub>* = 0.2 (petroleum ether/ethyl acetate = 6:1).

<sup>1</sup>H NMR (400 MHz, CDCl<sub>3</sub>) δ 8.15 – 8.13 (m, 1H), 8.00 – 7.98 (m, 1H), 7.76 – 7.73 (m, 2H), 5.55 (t, *J* = 6.0 Hz, 1H), 4.29 – 4.23 (m, 1H), 4.08 – 4.03 (m, 1H), 2.53 – 2.48 (m, 1H), 2.27 – 2.22 (m, 1H), 2.18 – 2.06 (m, 2H).

<sup>13</sup>C NMR (101 MHz, CDCl<sub>3</sub>) δ 154.5, 146.0, 141.3, 140.6, 130.6, 130.1, 129.3, 128.0, 78.0, 69.4, 30.9, 25.7.

**(2x)** 2-Phenyl-4-(tetrahydrofuran-2-yl)pyridine (1795742-55-0)<sup>7</sup>

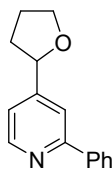

Chemical Formula: C<sub>15</sub>H<sub>15</sub>NO  
Exact Mass: 225.1154  
Molecular Weight: 225.2910

Following the General Procedure A with 2-phenylpyridine (31.0 mg, 0.2 mmol), **2x** was obtained as yellow oil (18.5 mg, 41%), *R<sub>f</sub>* = 0.3 (petroleum ether/ethyl acetate = 4:1).

<sup>1</sup>H NMR (400 MHz, CDCl<sub>3</sub>): δ 8.63 (d, *J* = 5.2 Hz, 1H), 8.00 (d, *J* = 6.8 Hz, 2H), 7.70 (s, 1H), 7.49 – 7.39 (m, 3H), 7.19 (d, *J* = 4.4 Hz, 1H), 4.97 (t, *J* = 7.2 Hz, 1H), 4.15 – 4.10 (m, 1H), 4.02–3.96 (m, 1H), 2.44 – 2.38 (m, 1H), 2.06–1.98 (m, 2H), 1.84–1.79 (m, 1H).

<sup>13</sup>C NMR (101 MHz, CDCl<sub>3</sub>): δ 157.5, 153.7, 149.5, 139.3, 128.93, 128.9, 127.0, 119.0, 117.3, 79.2, 69.0, 34.3, 25.8.

## 5 References

1. J. Zhou, Y. Zou, P. Zhou, Z. Chen and J. Li, *Org. Chem. Front.*, 2019, **6**, 1594.
2. C. Y. Huang, J. Li, W. Liu and C. J. Li, *Chem. Sci.*, 2019, **10**, 5018–5024.
3. X. Li, C. Liu, S. Guo, W. Wang and Y. Zhang, *Eur. J. Org. Chem.*, 2021, 411–421.
4. S. Wang, Y. Fan, H. Zhao, J. Wang, S. Zhang and W. Wang, *Synlett*, 2019, **30**, 2096–2100.
5. L. Li, X. Song, M. F. Qi and B. Sun, *Tetrahedron.*, 2022, **99**, 153846.
6. S. Liu, A. Liu, Y. Zhang and W. Wang, *Chem. Sci.*, 2017, **8**, 4044.
7. Z. Zhou, Y. Wu, P. Yang, S. Deng, Q. Zhang and D. Li, *ChemistrySelect*, 2021, **6**, 2770–2773.

**6 Copies**

**of**

**NMR**

**spectra**

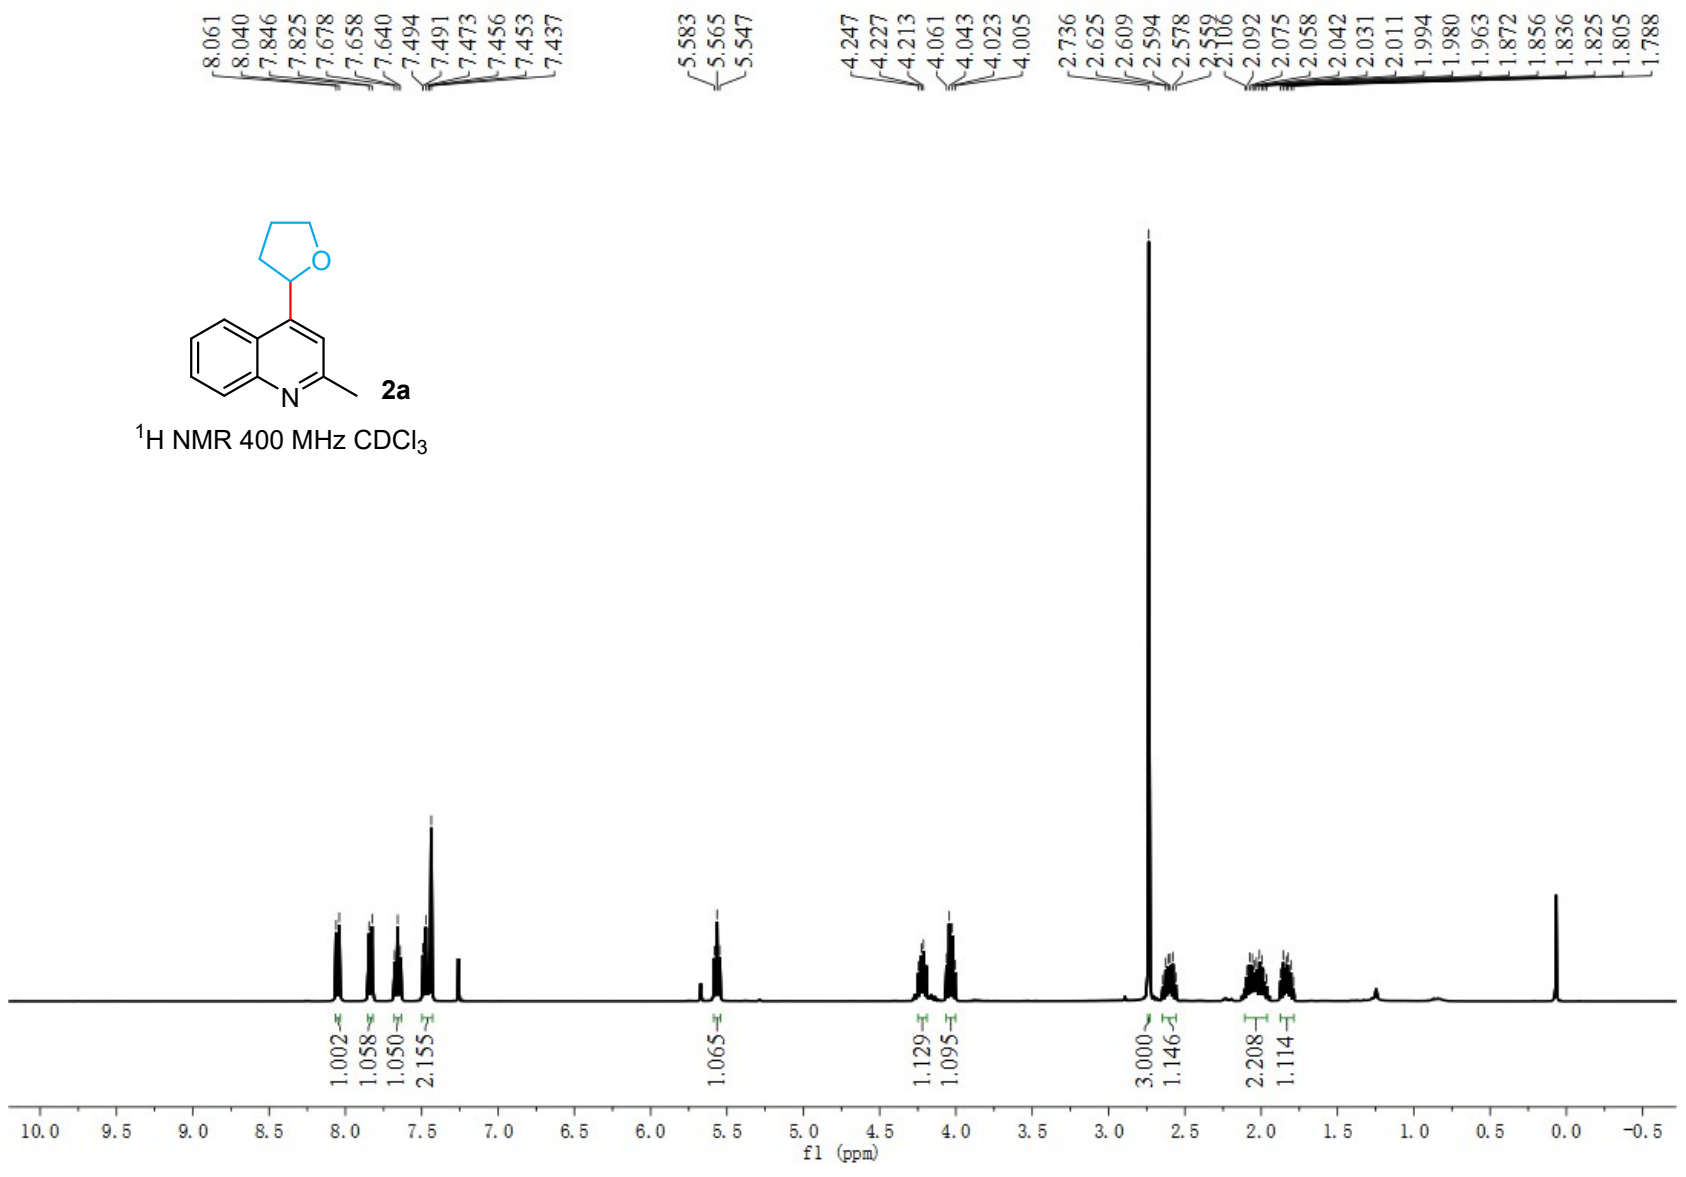



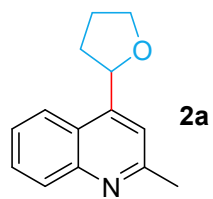

$^{13}\text{C}$  NMR 101 MHz  $\text{CDCl}_3$

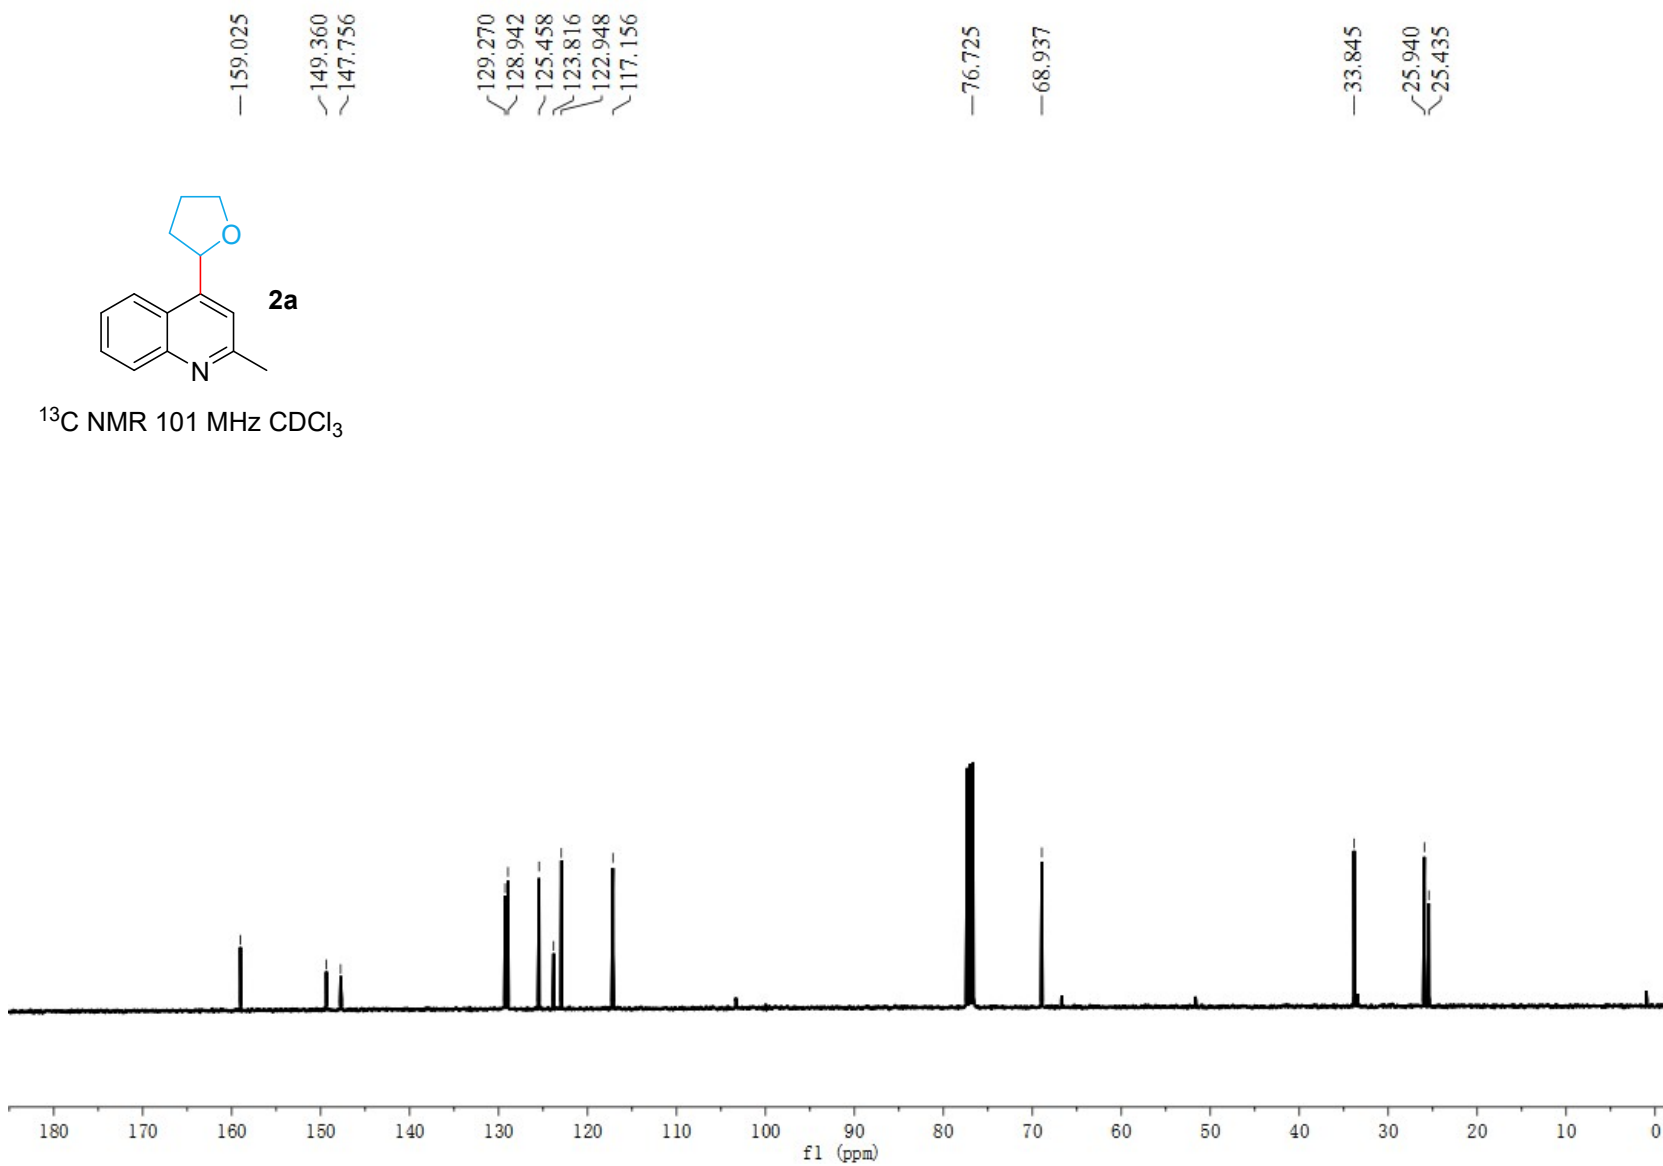

8.243  
8.221  
8.201  
8.059  
7.913  
7.892  
7.738  
7.720  
7.700  
7.555  
7.548  
7.537  
7.518  
7.485  
7.466  
7.448

5.675  
5.657  
5.640

4.306  
4.287  
4.272  
4.254  
4.110  
4.091  
4.072  
4.054

2.678  
2.661  
2.647  
2.630  
2.614  
2.119  
2.103  
2.086  
2.071  
2.059  
2.041  
2.023  
2.009  
1.993  
1.976  
1.941  
1.924  
1.906  
1.894  
1.875  
1.858

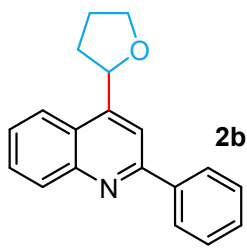

<sup>1</sup>H NMR 400 MHz CDCl<sub>3</sub>

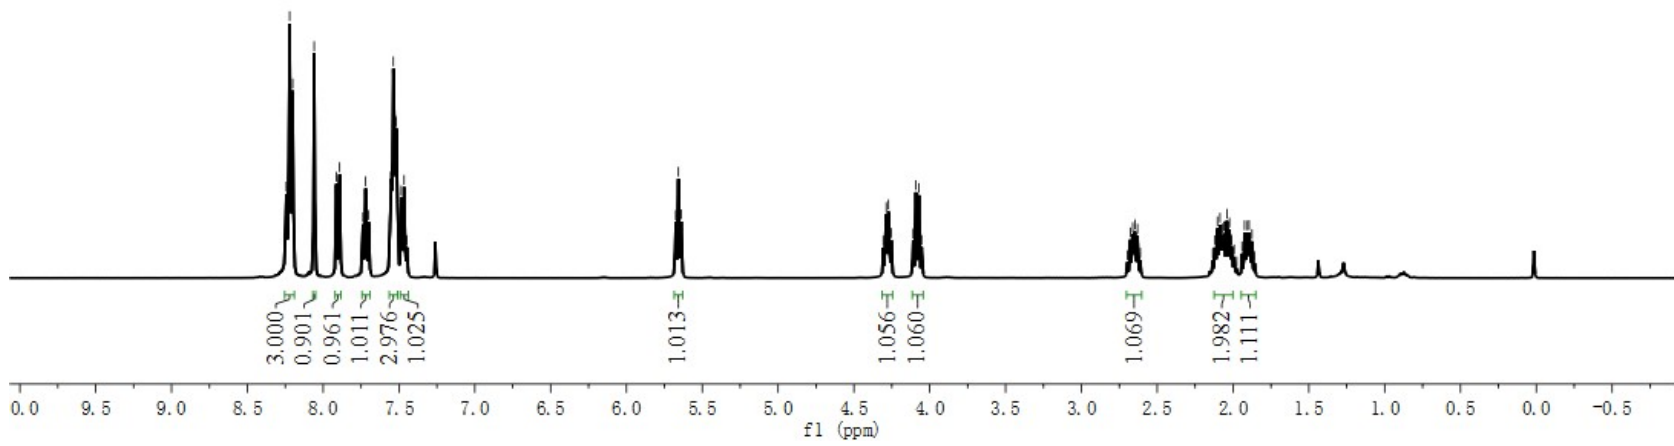

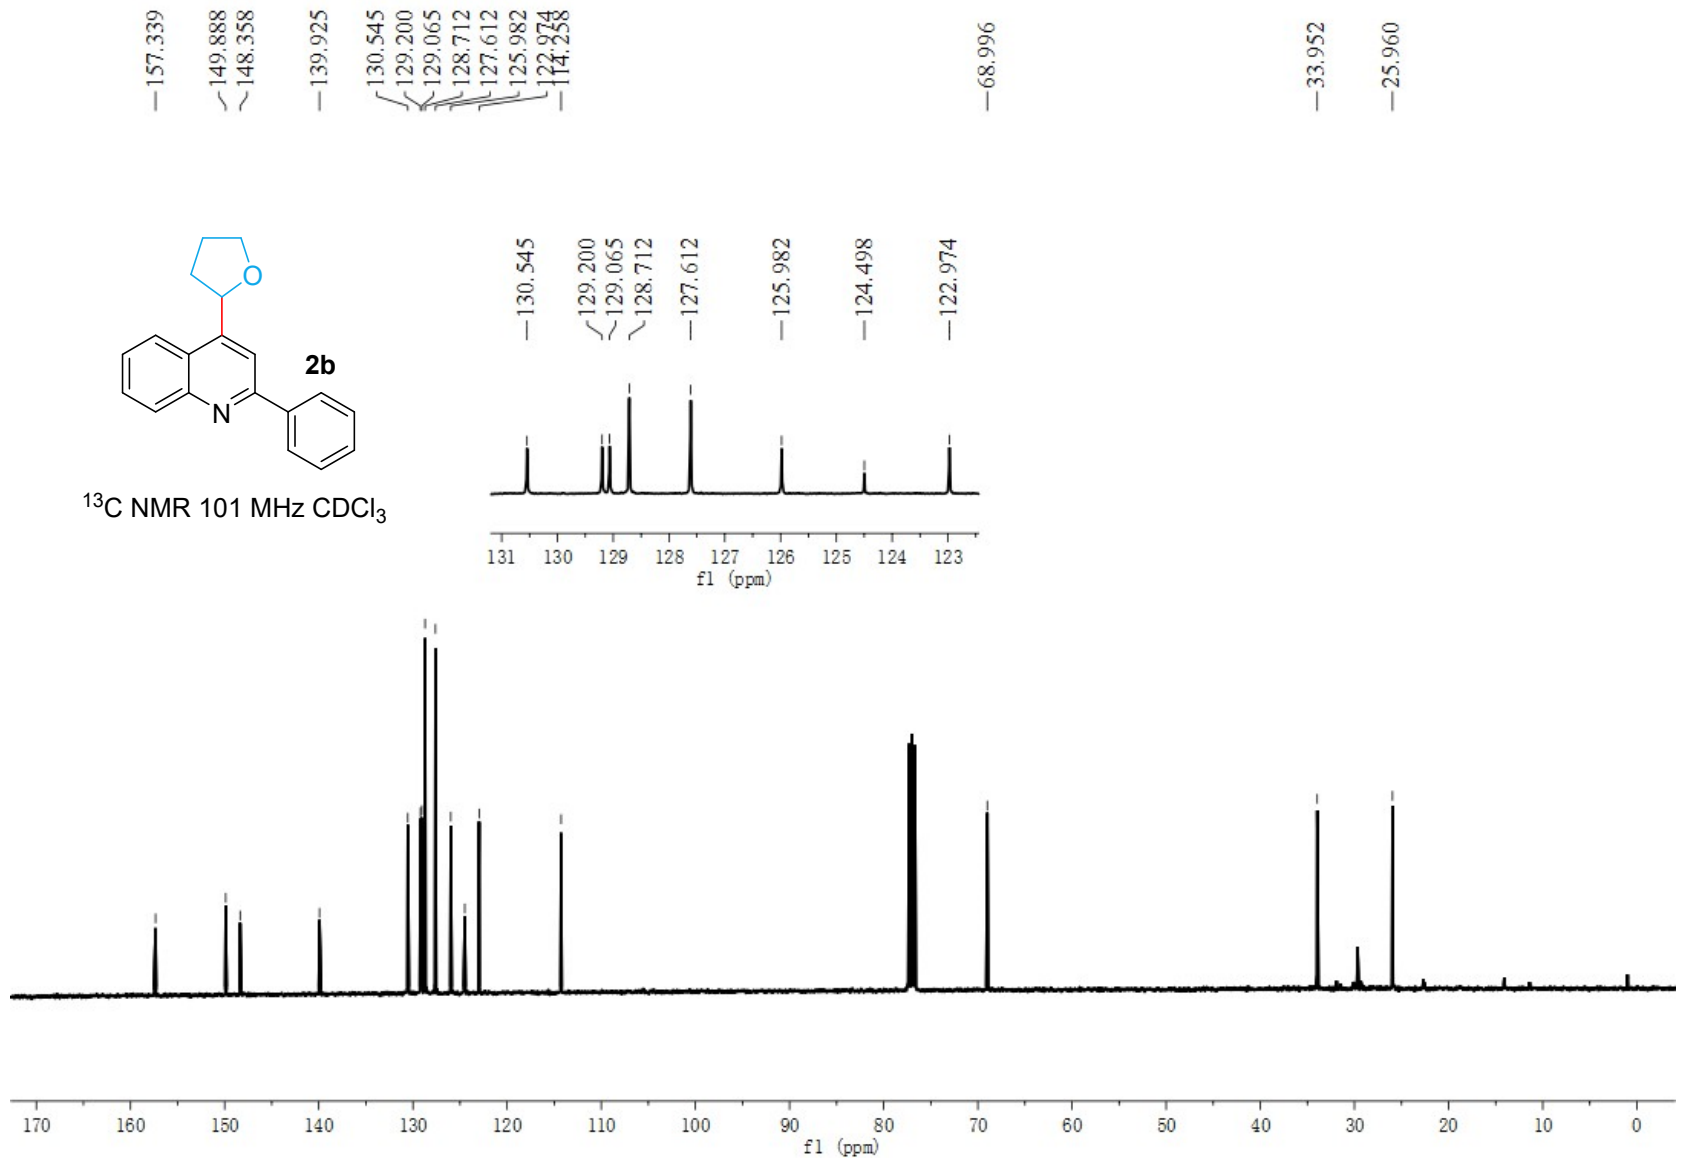

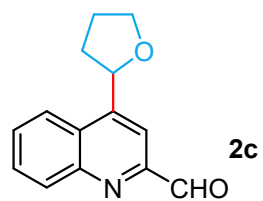

$^1\text{H NMR}$  400 MHz  $\text{CDCl}_3$

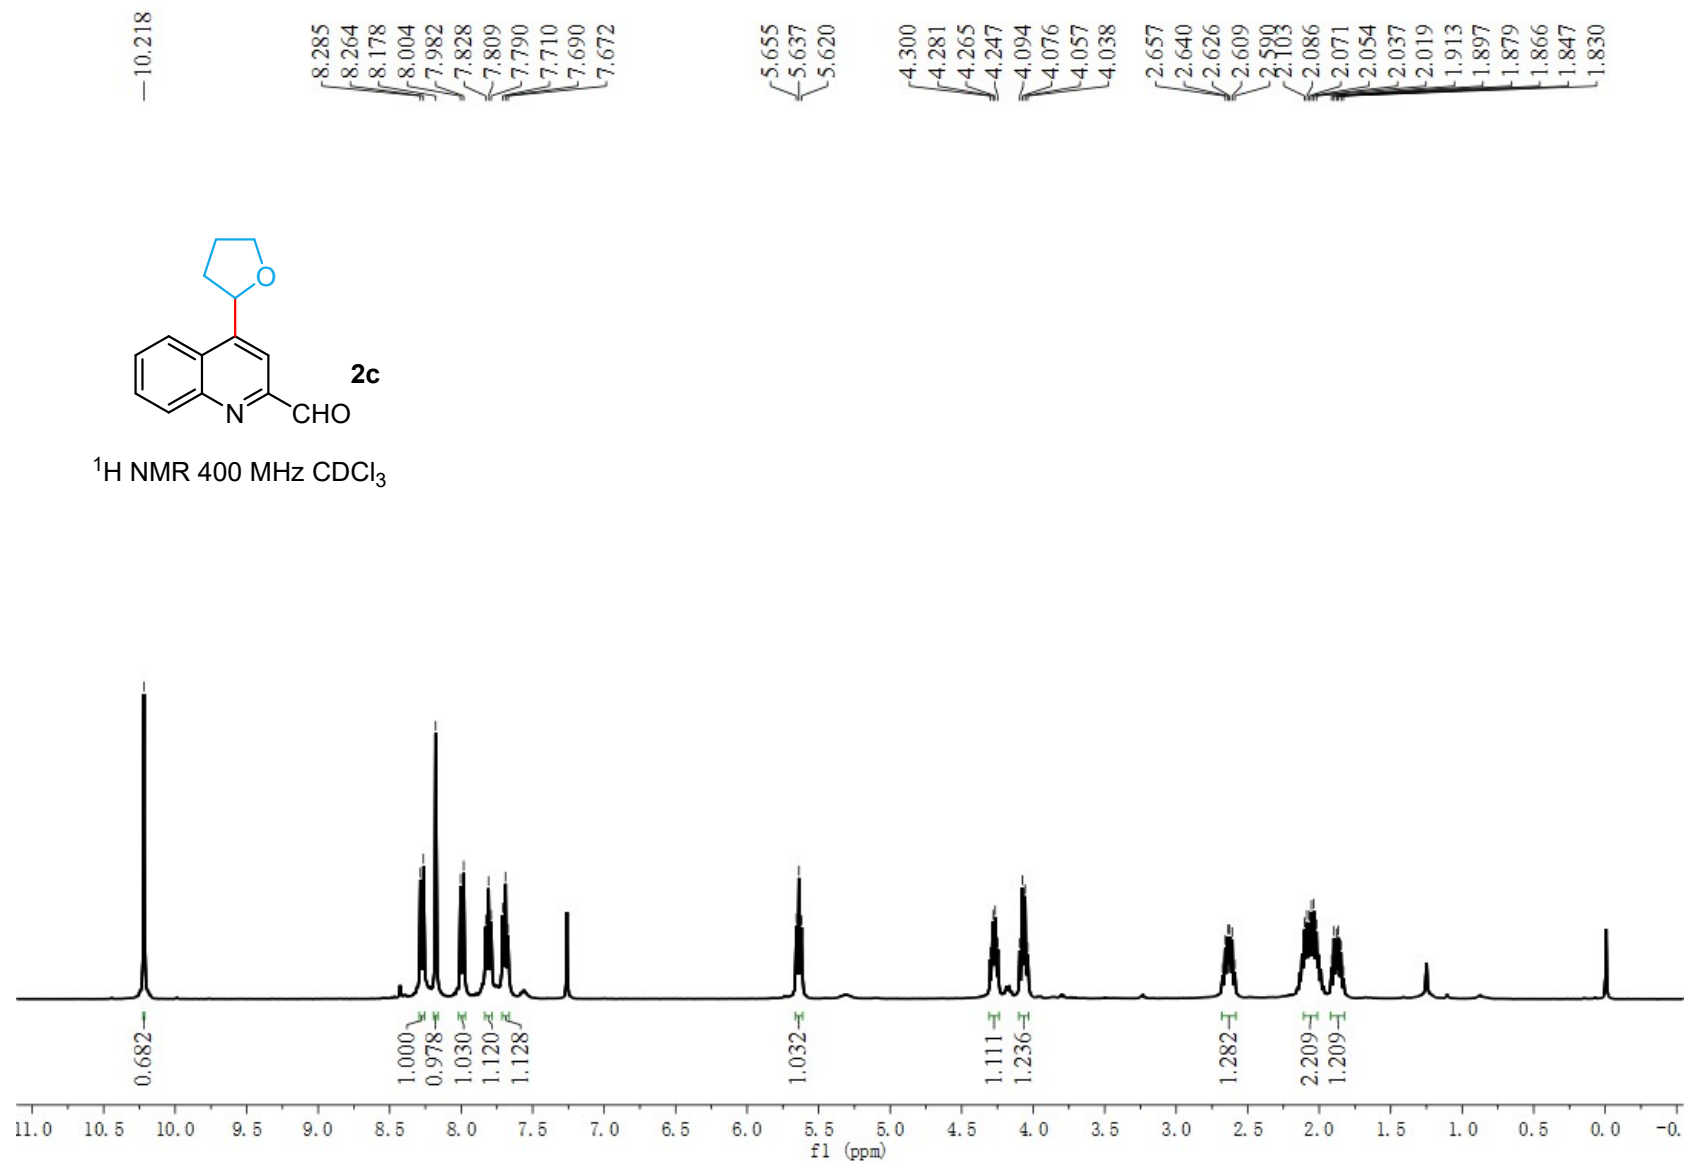

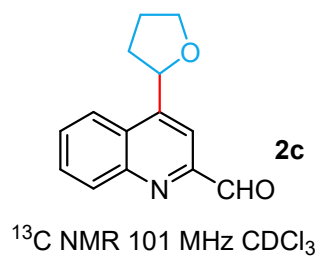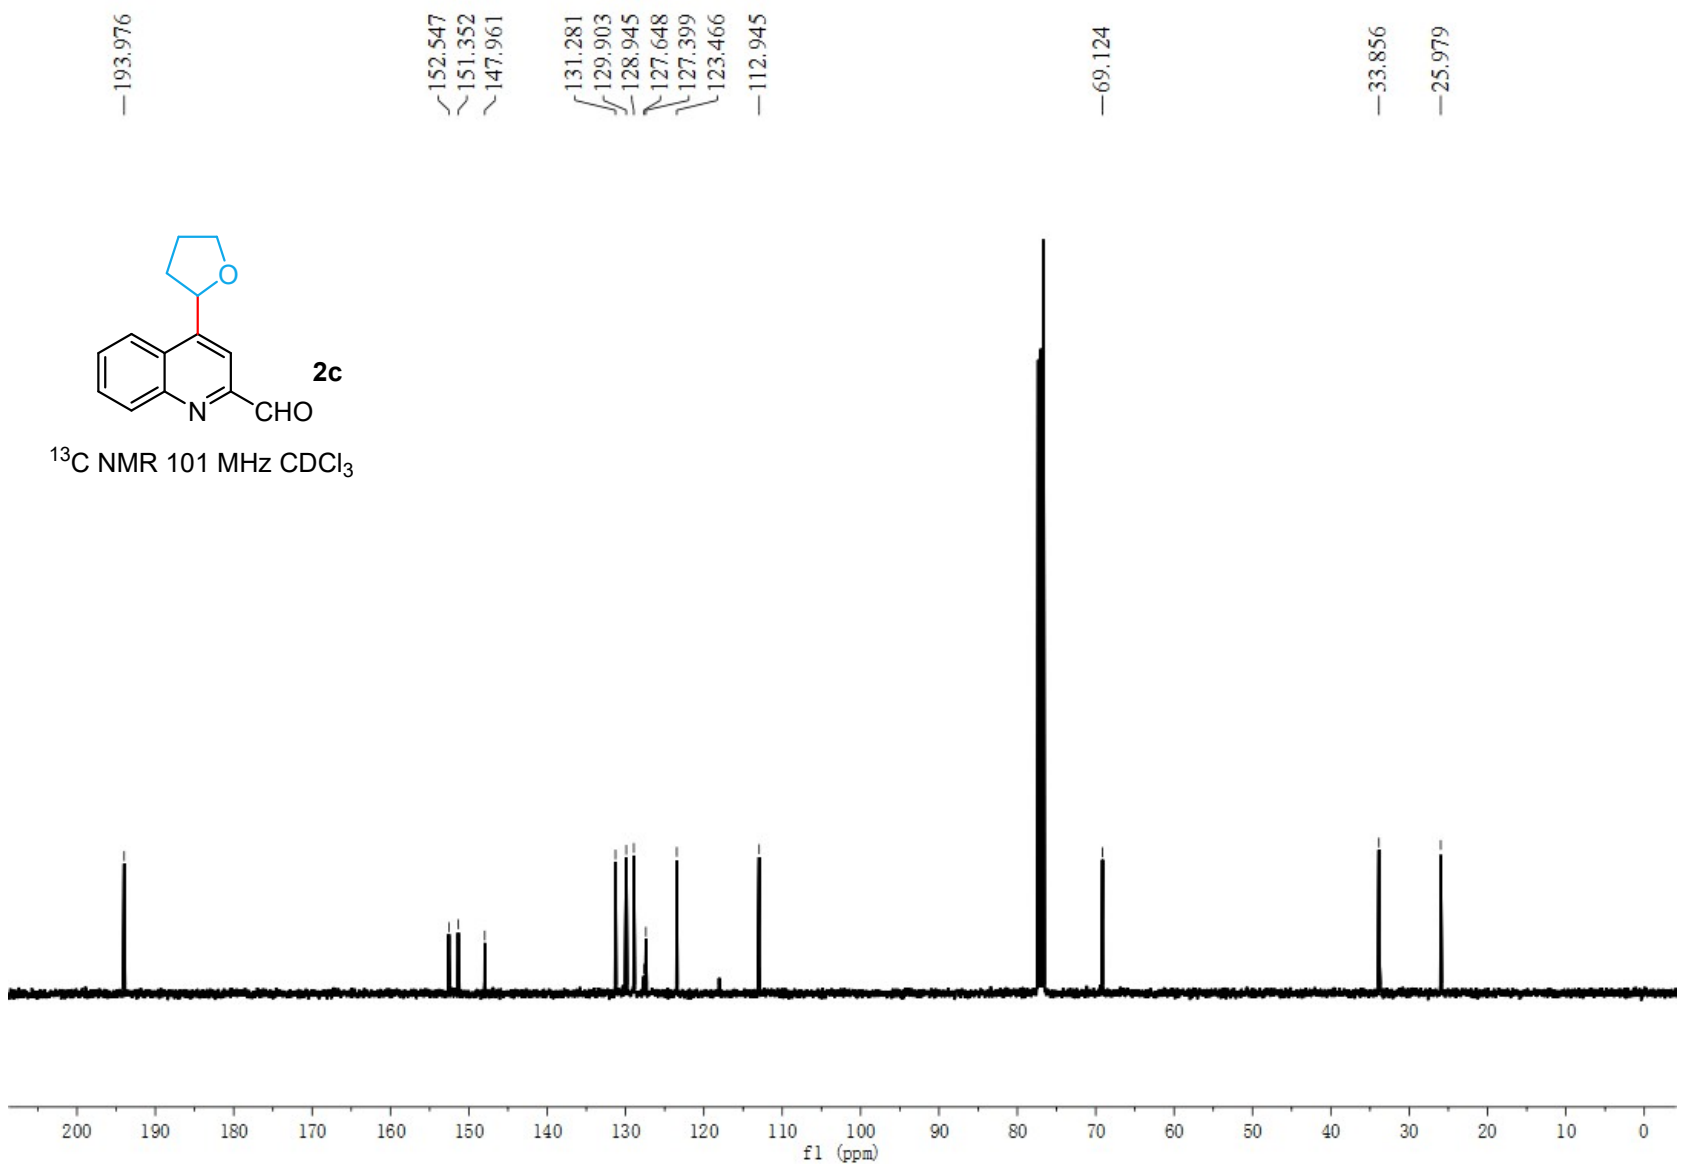

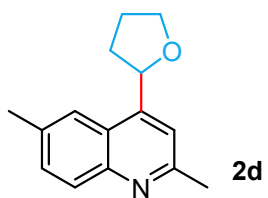

$^1\text{H NMR}$  400 MHz  $\text{CDCl}_3$

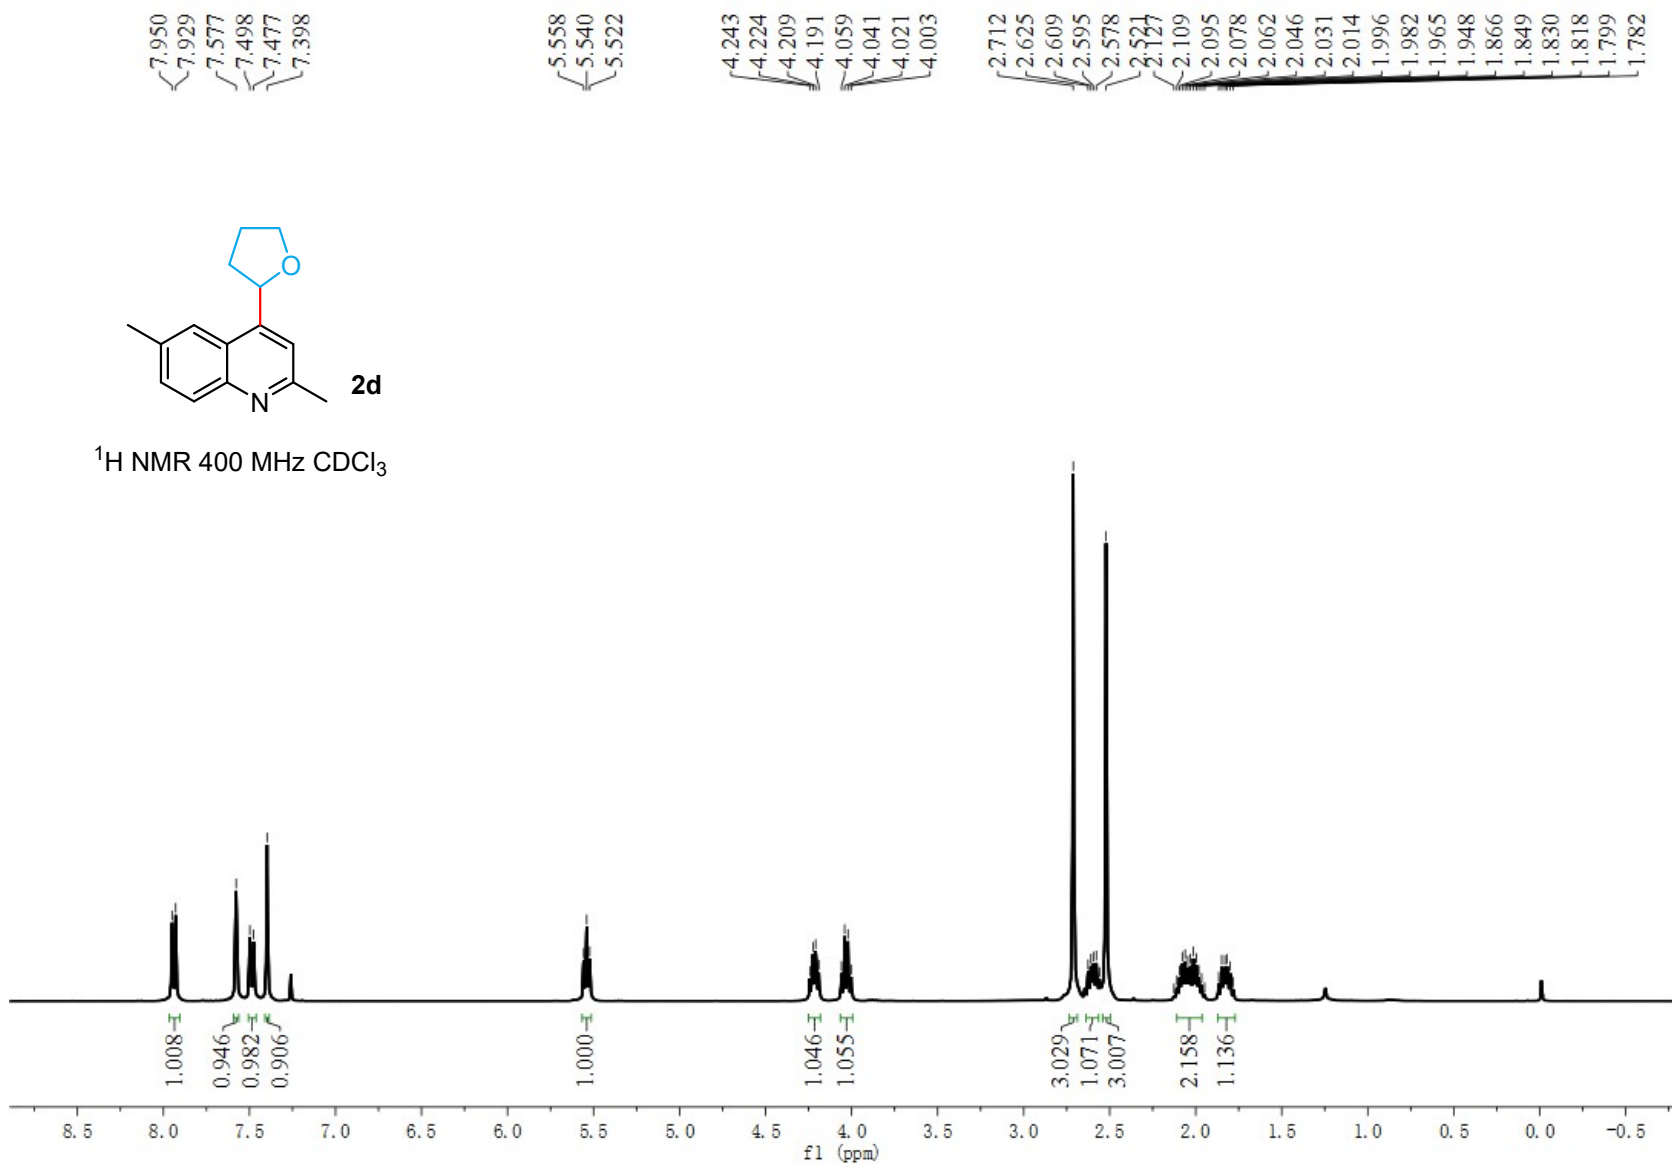

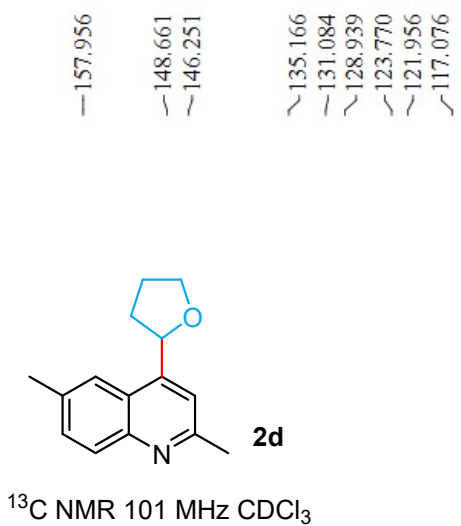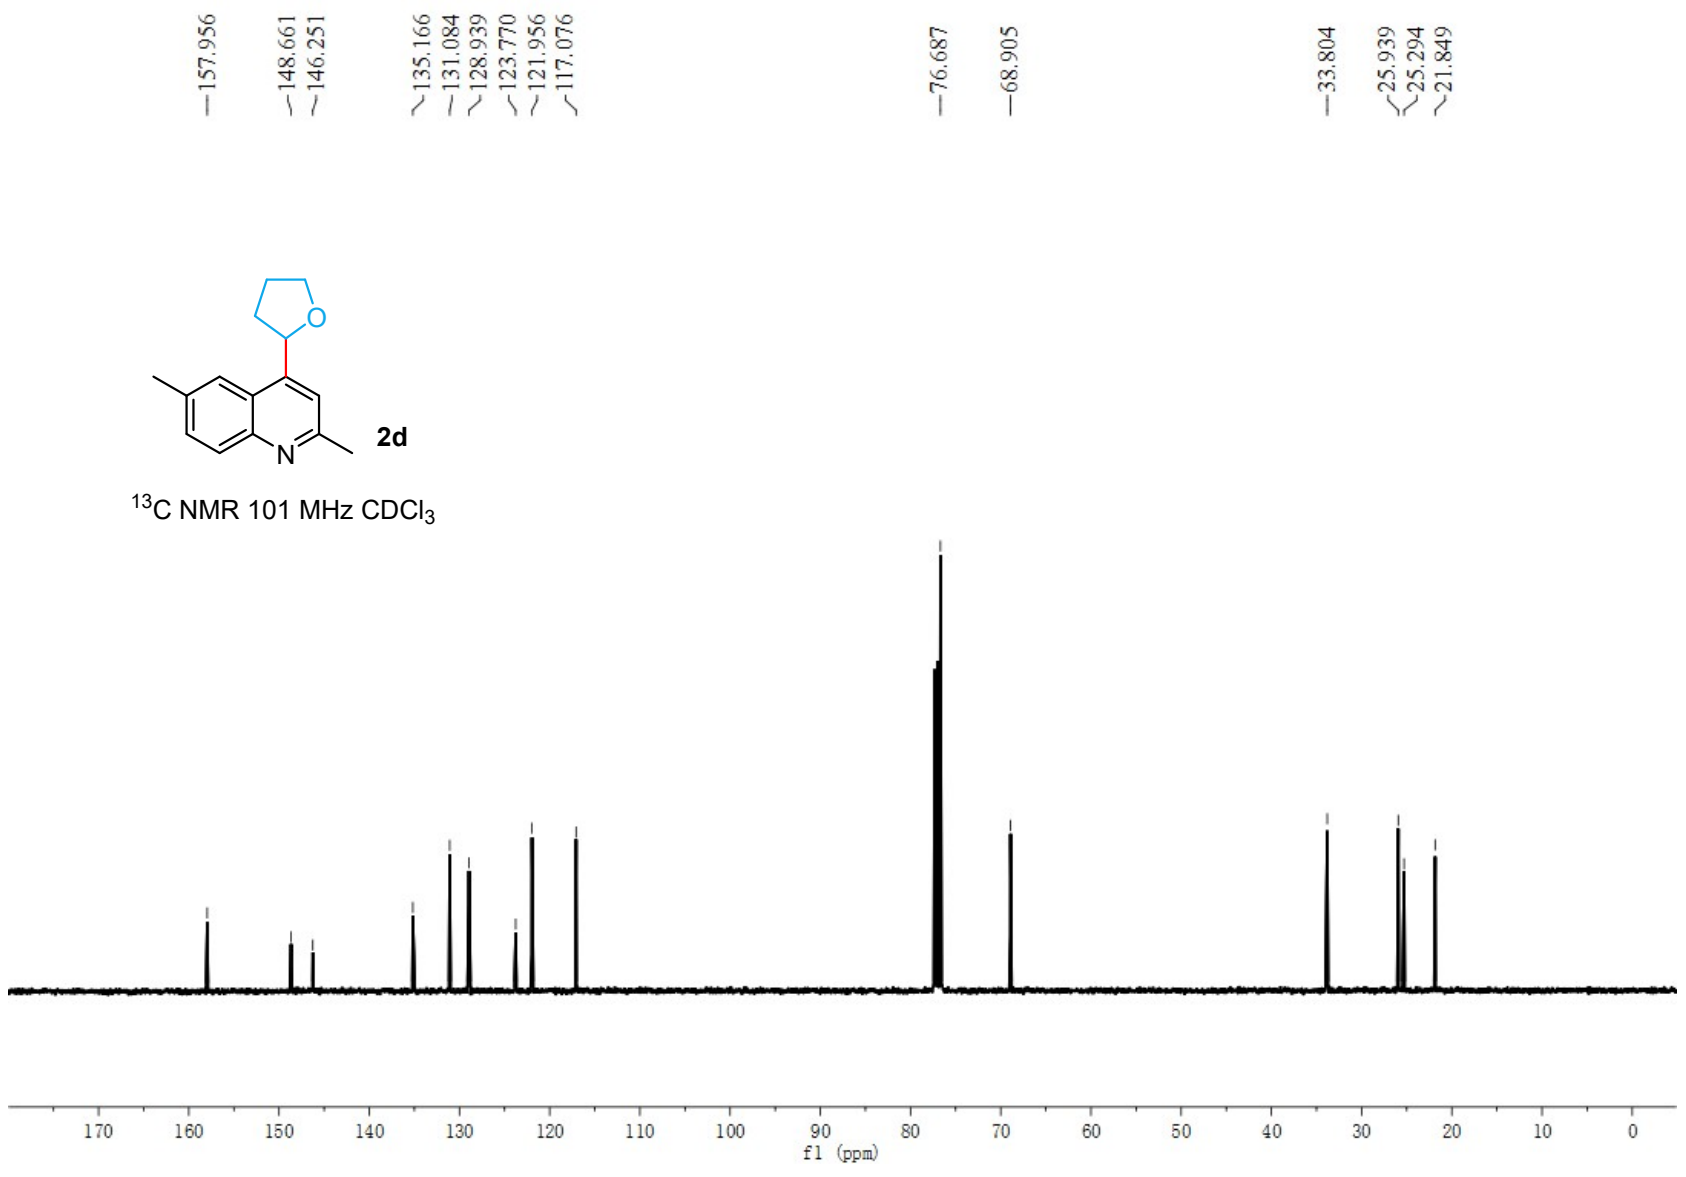

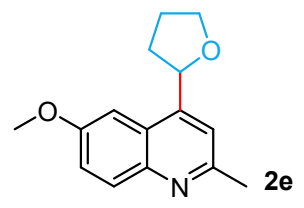

<sup>1</sup>H NMR 400 MHz CDCl<sub>3</sub>

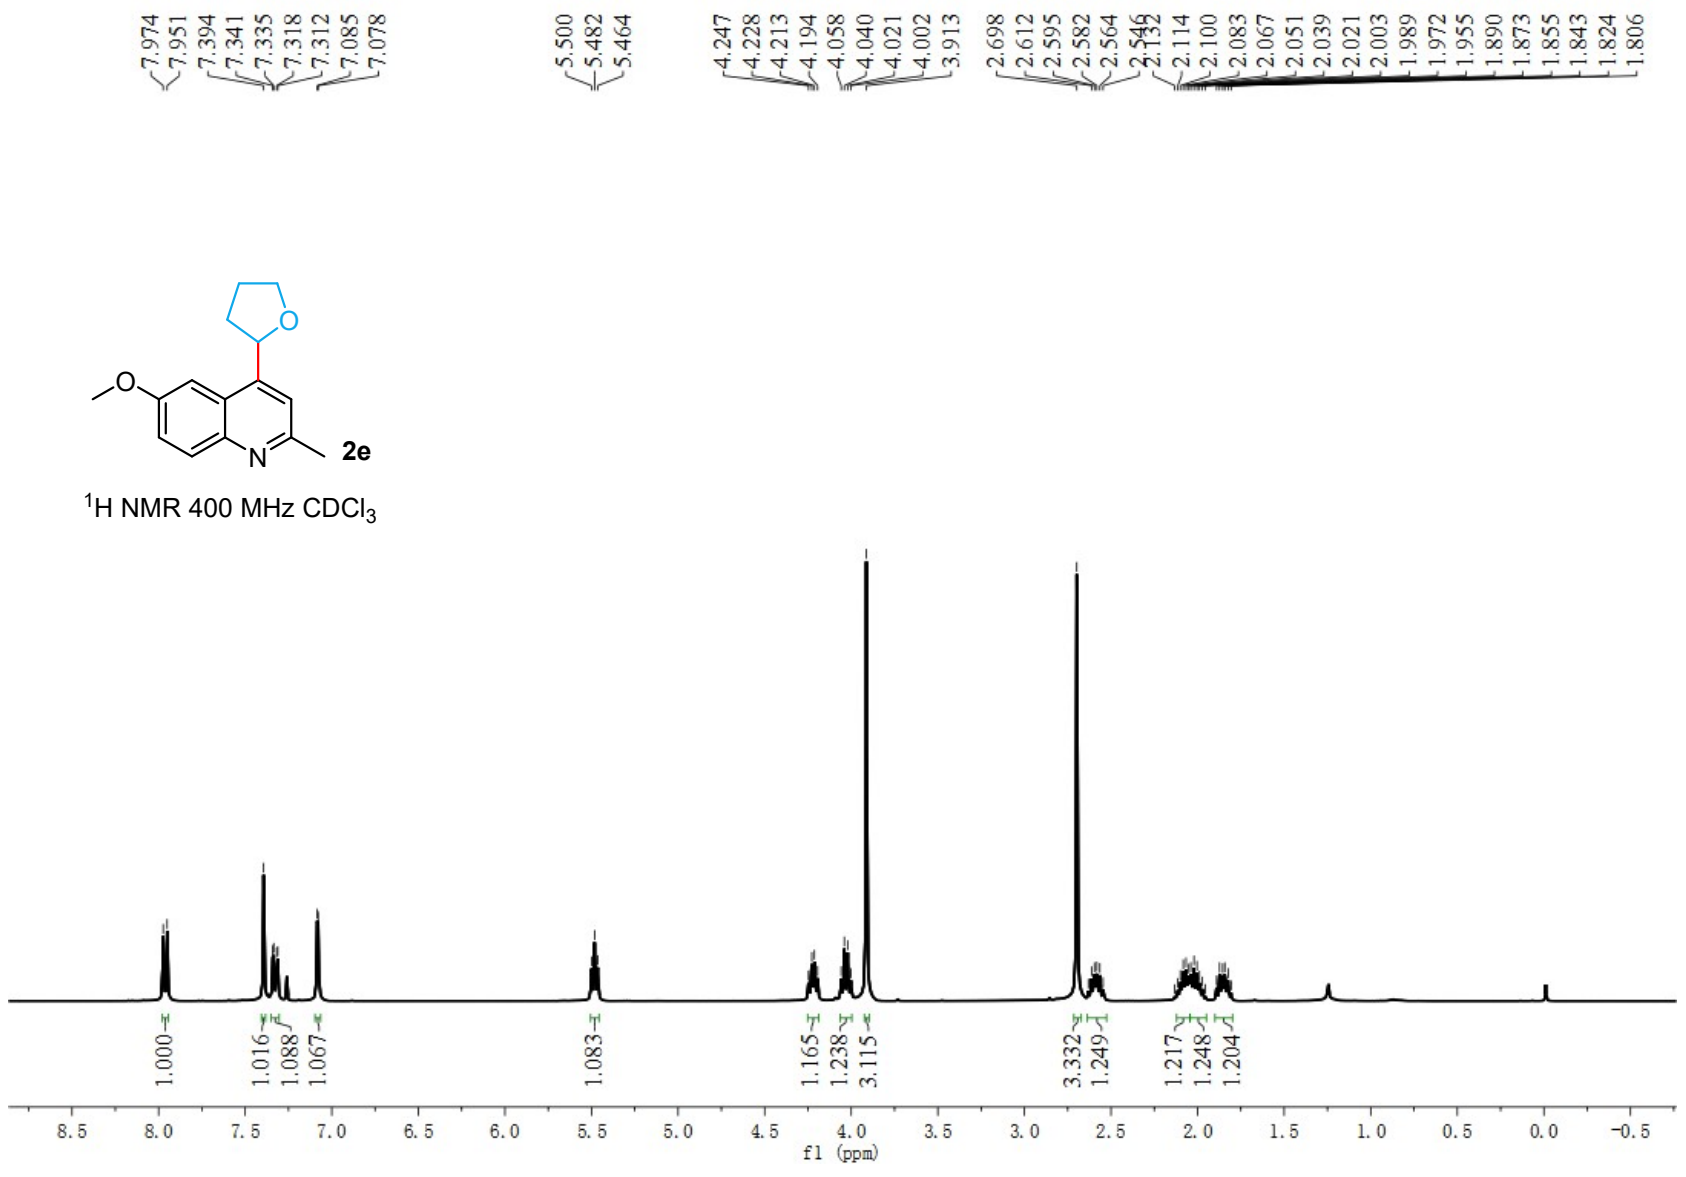



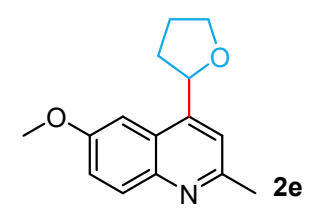

<sup>13</sup>C NMR 101 MHz CDCl<sub>3</sub>

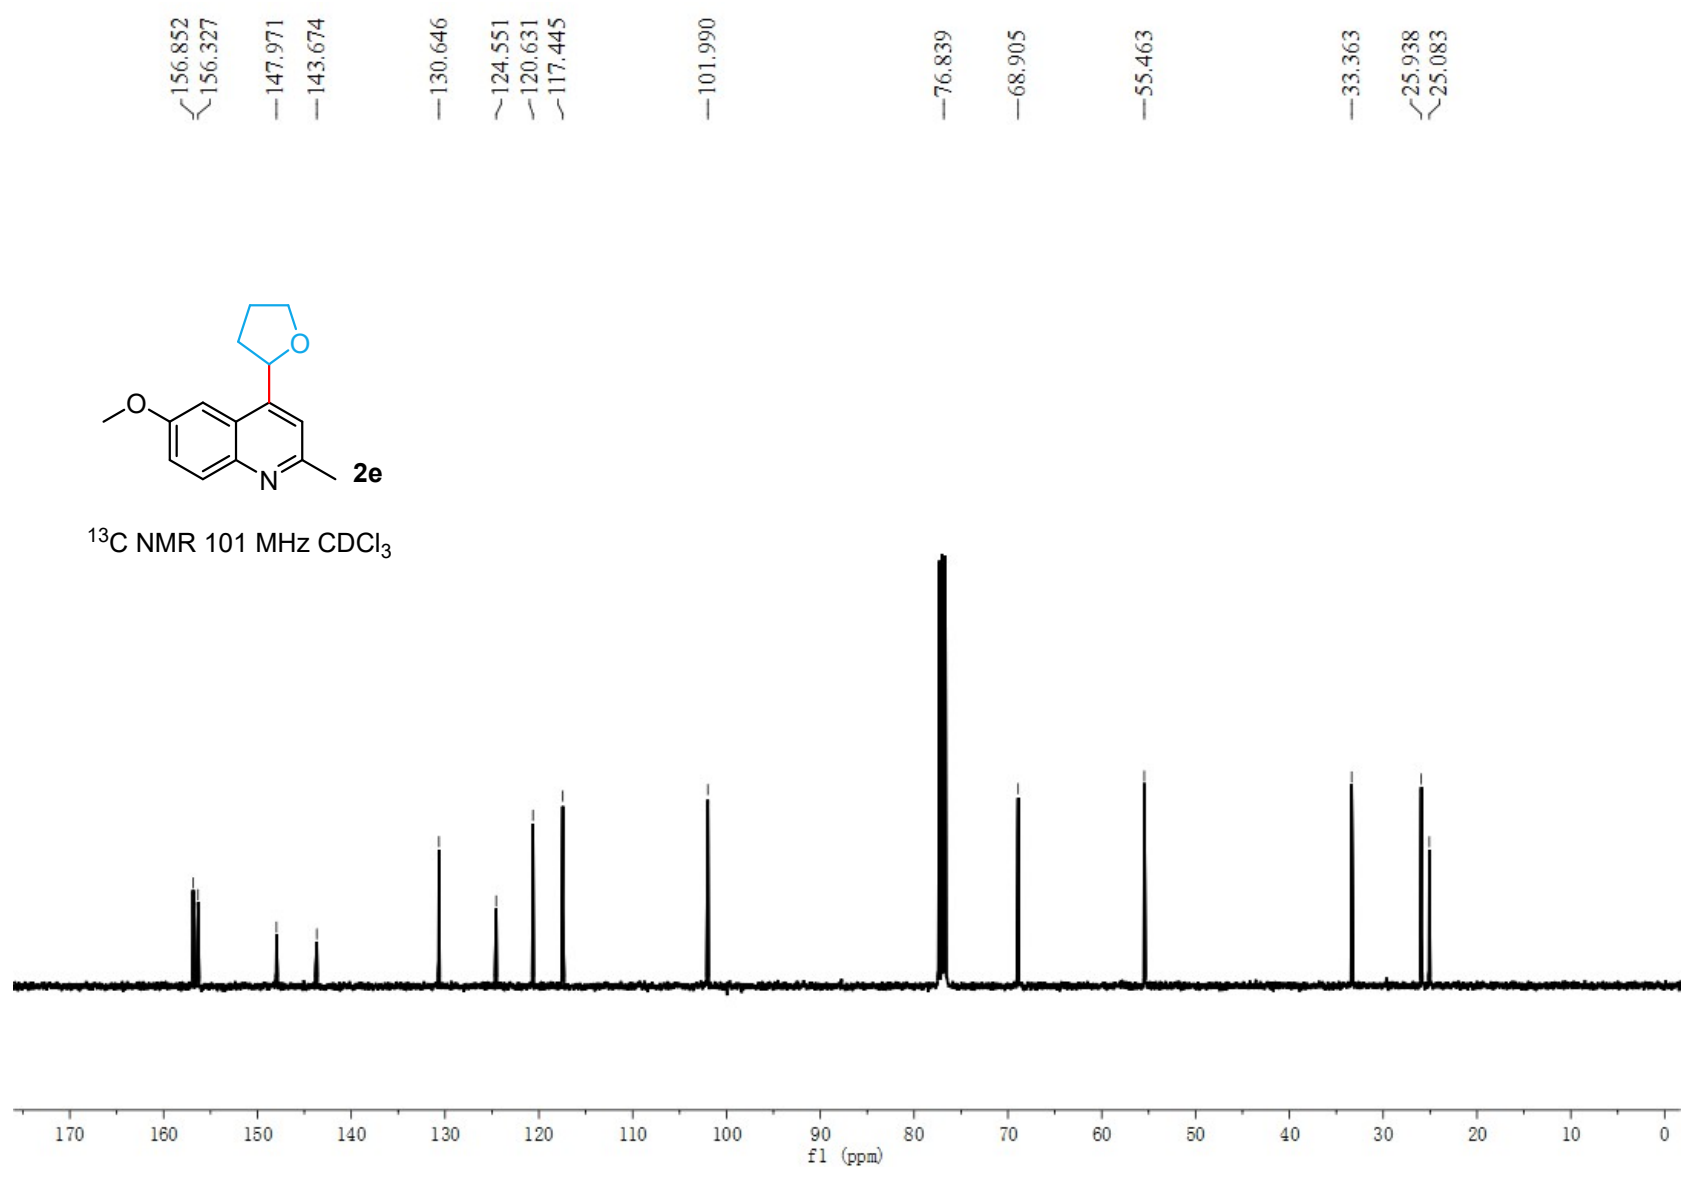

8.030  
8.016  
8.008  
7.994  
7.451  
7.444  
7.432  
7.420  
7.413  
7.391

5.435  
5.417  
5.399

4.232  
4.213  
4.198  
4.180  
4.046  
4.028  
4.008  
3.990  
2.704  
2.611  
2.592  
2.576  
2.561  
2.545  
2.526  
2.122  
2.105  
2.091  
2.074  
2.057  
2.042  
2.028  
2.010  
1.992  
1.978  
1.961  
1.944  
1.848  
1.831  
1.812  
1.800  
1.781  
1.763

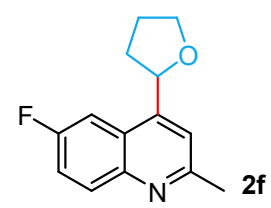

<sup>1</sup>H NMR 400 MHz CDCl<sub>3</sub>

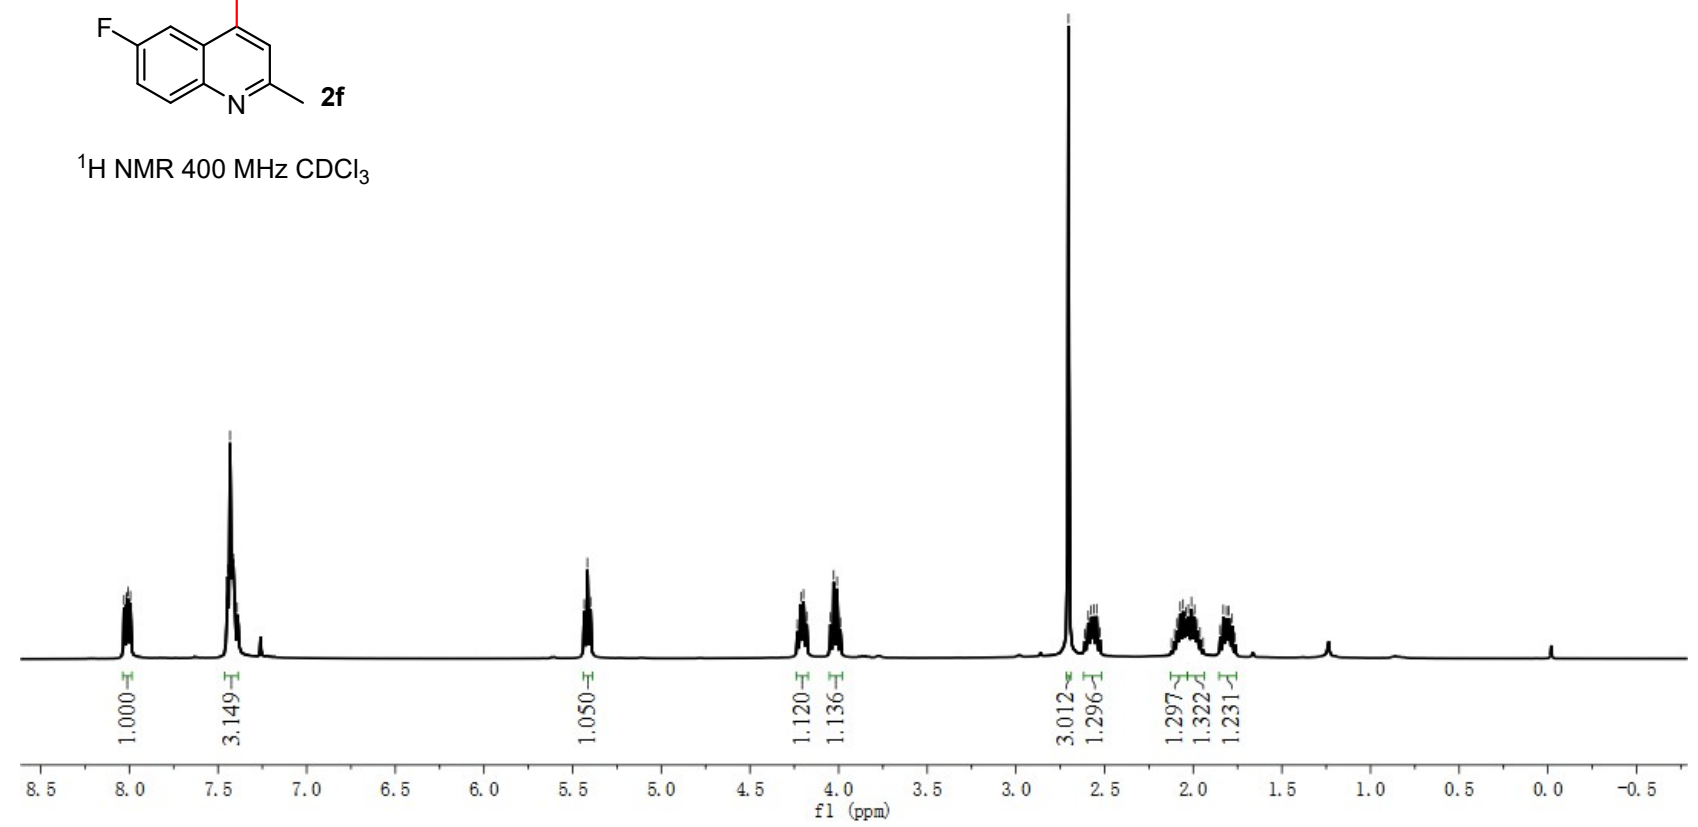

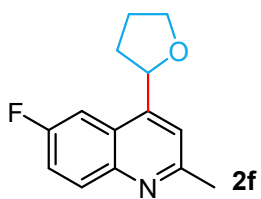

$^{13}\text{C}$  NMR 101 MHz  $\text{CDCl}_3$

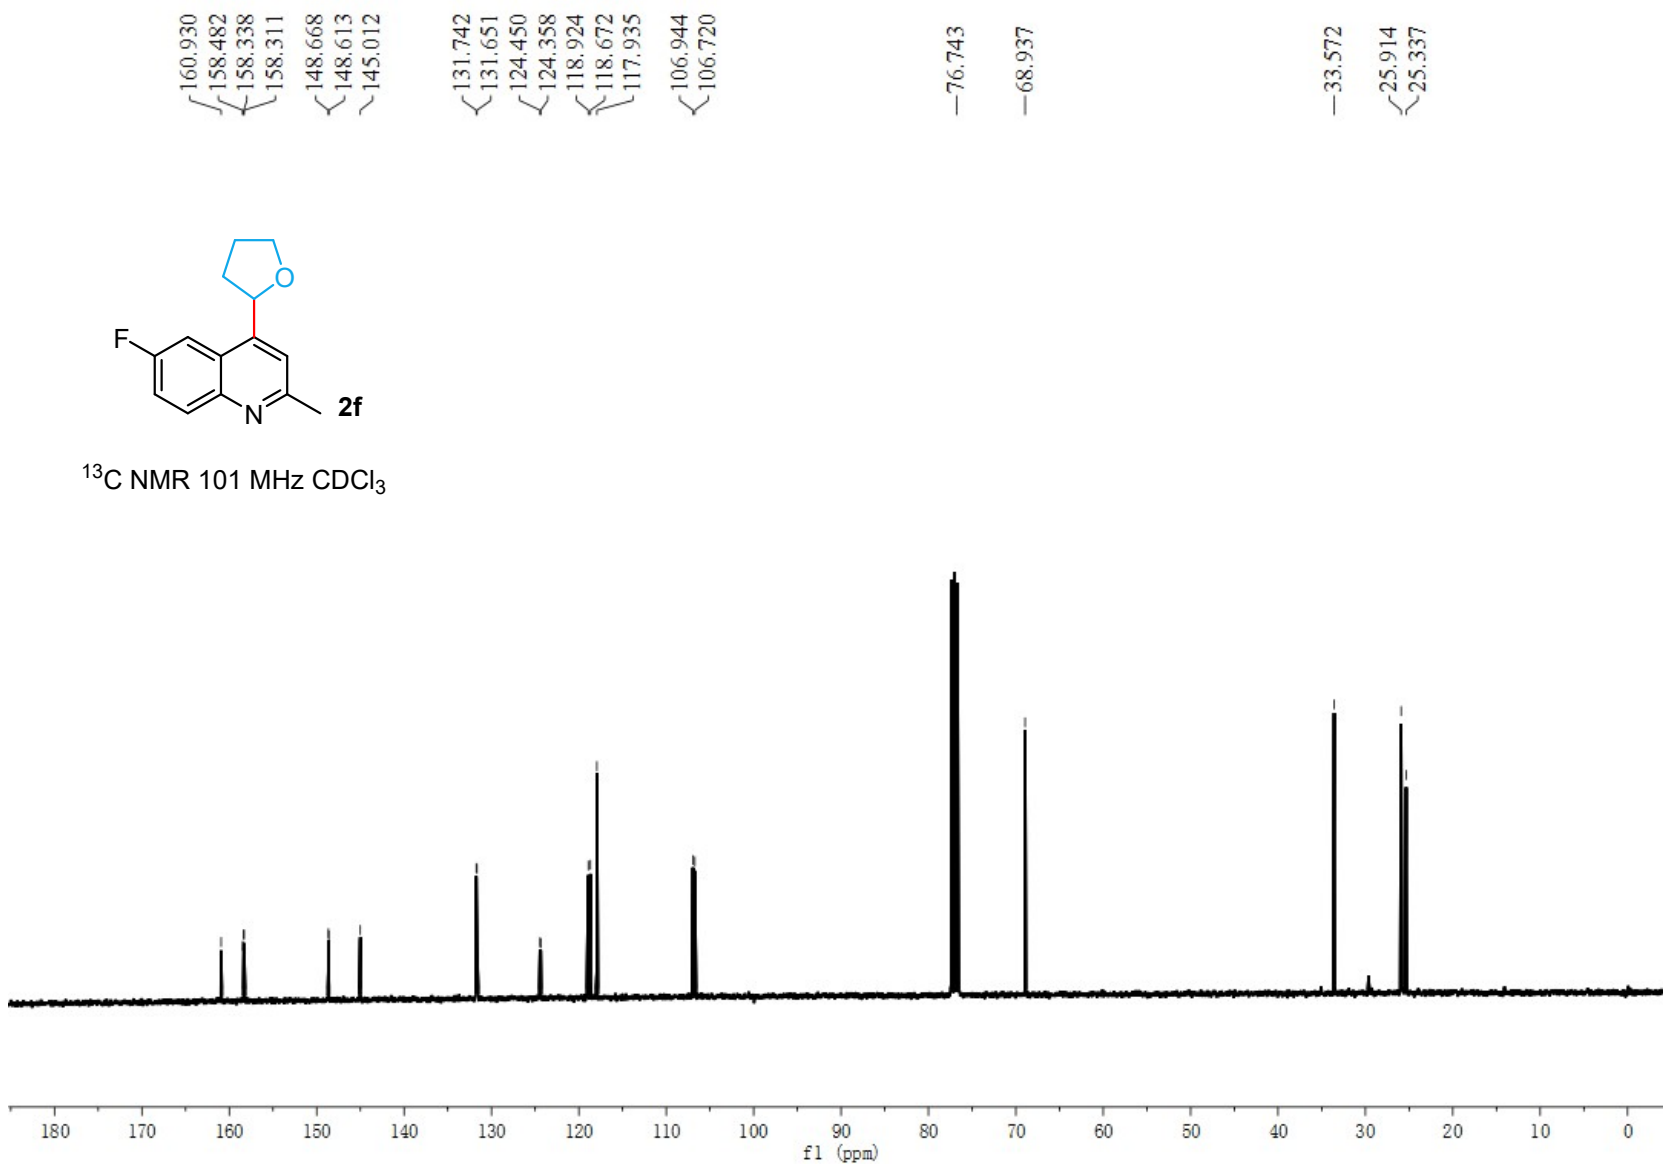

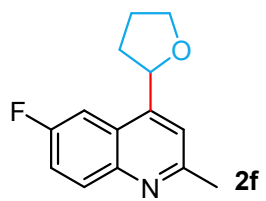

$^{19}\text{F}$  NMR 376 MHz  $\text{CDCl}_3$

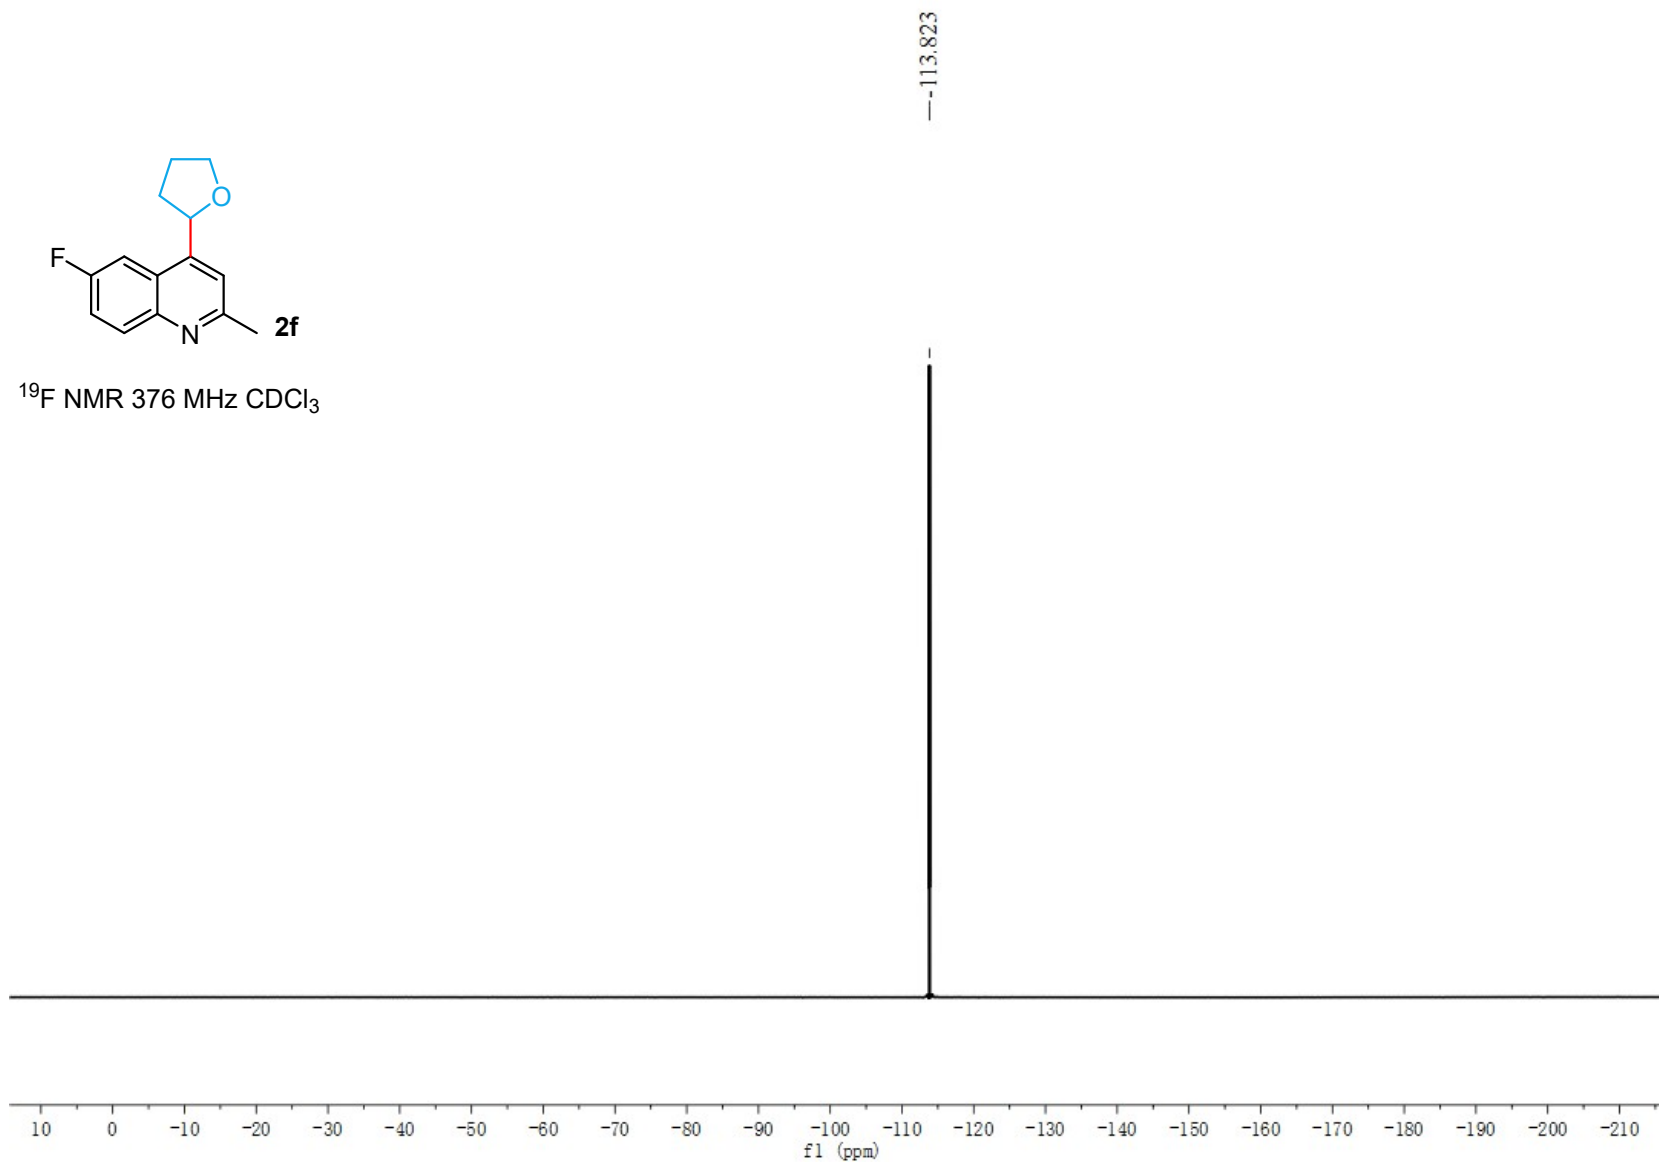

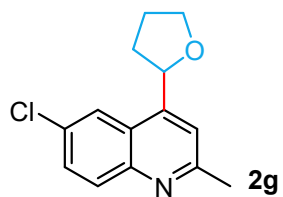

$^1\text{H NMR}$  400 MHz  $\text{CDCl}_3$

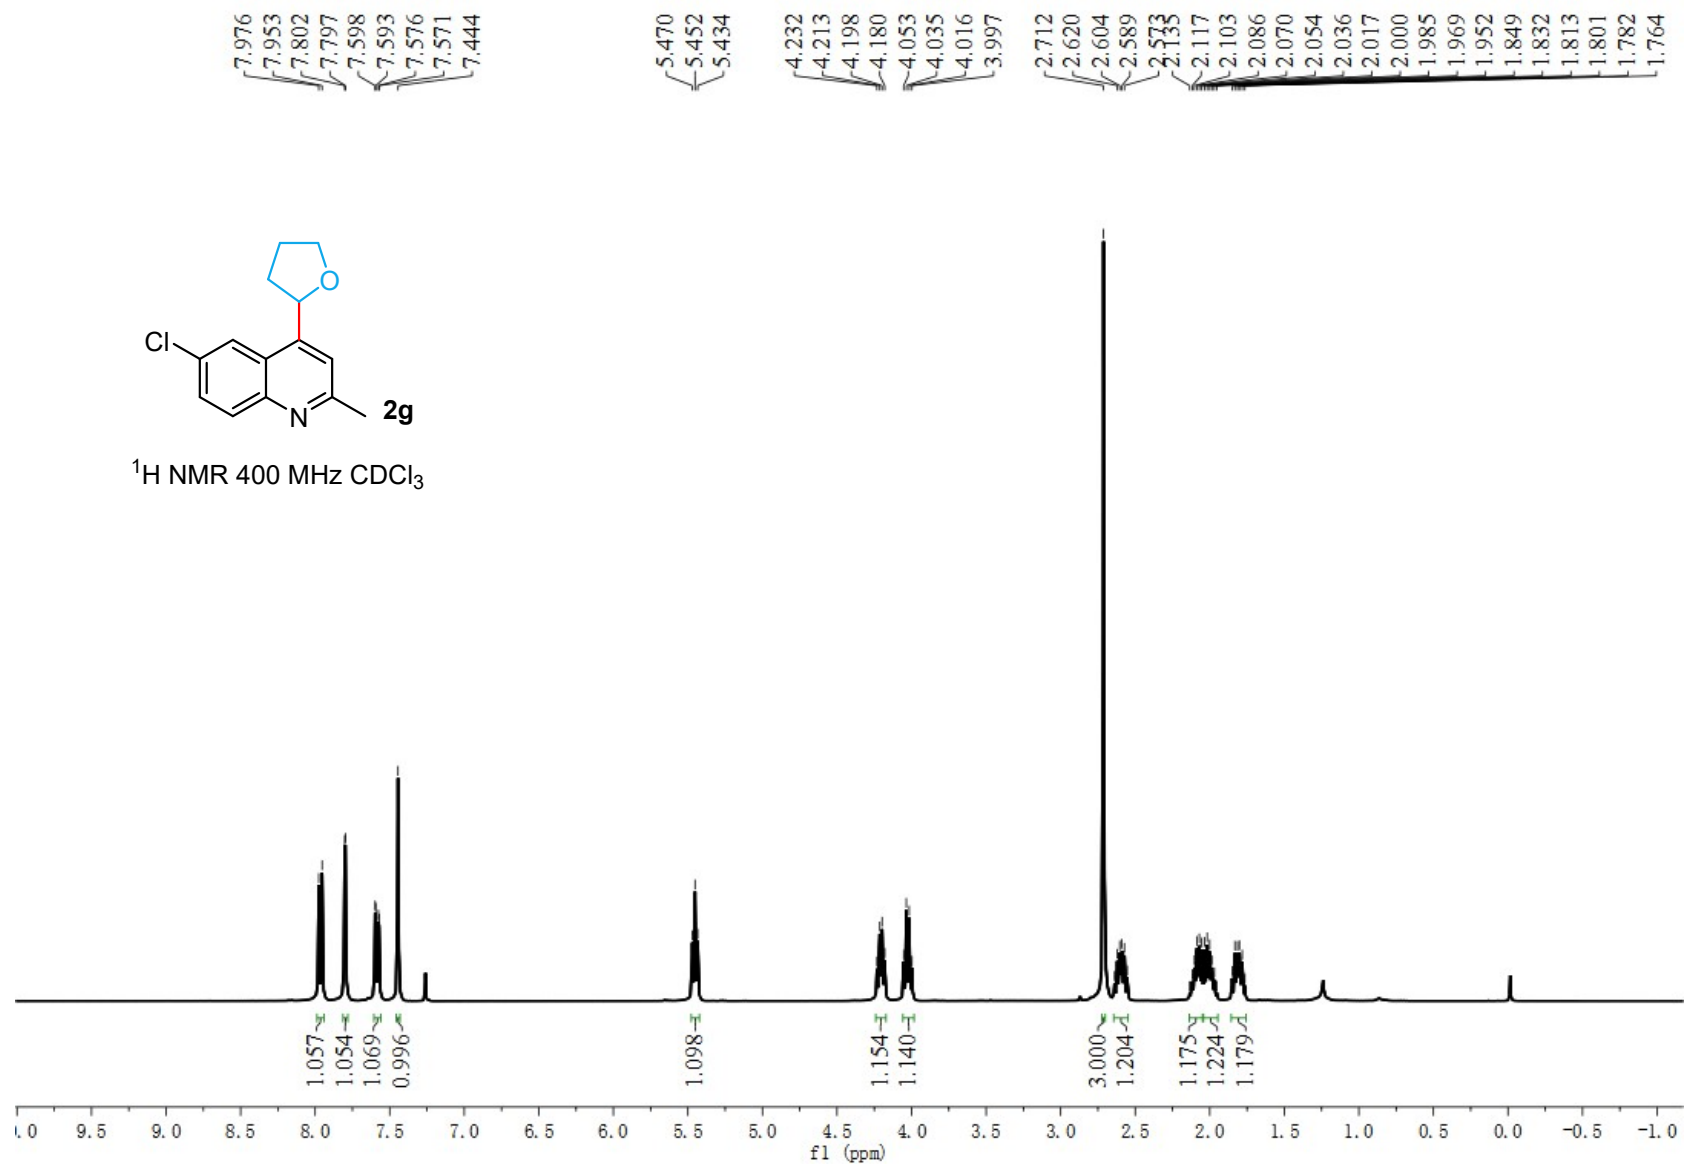

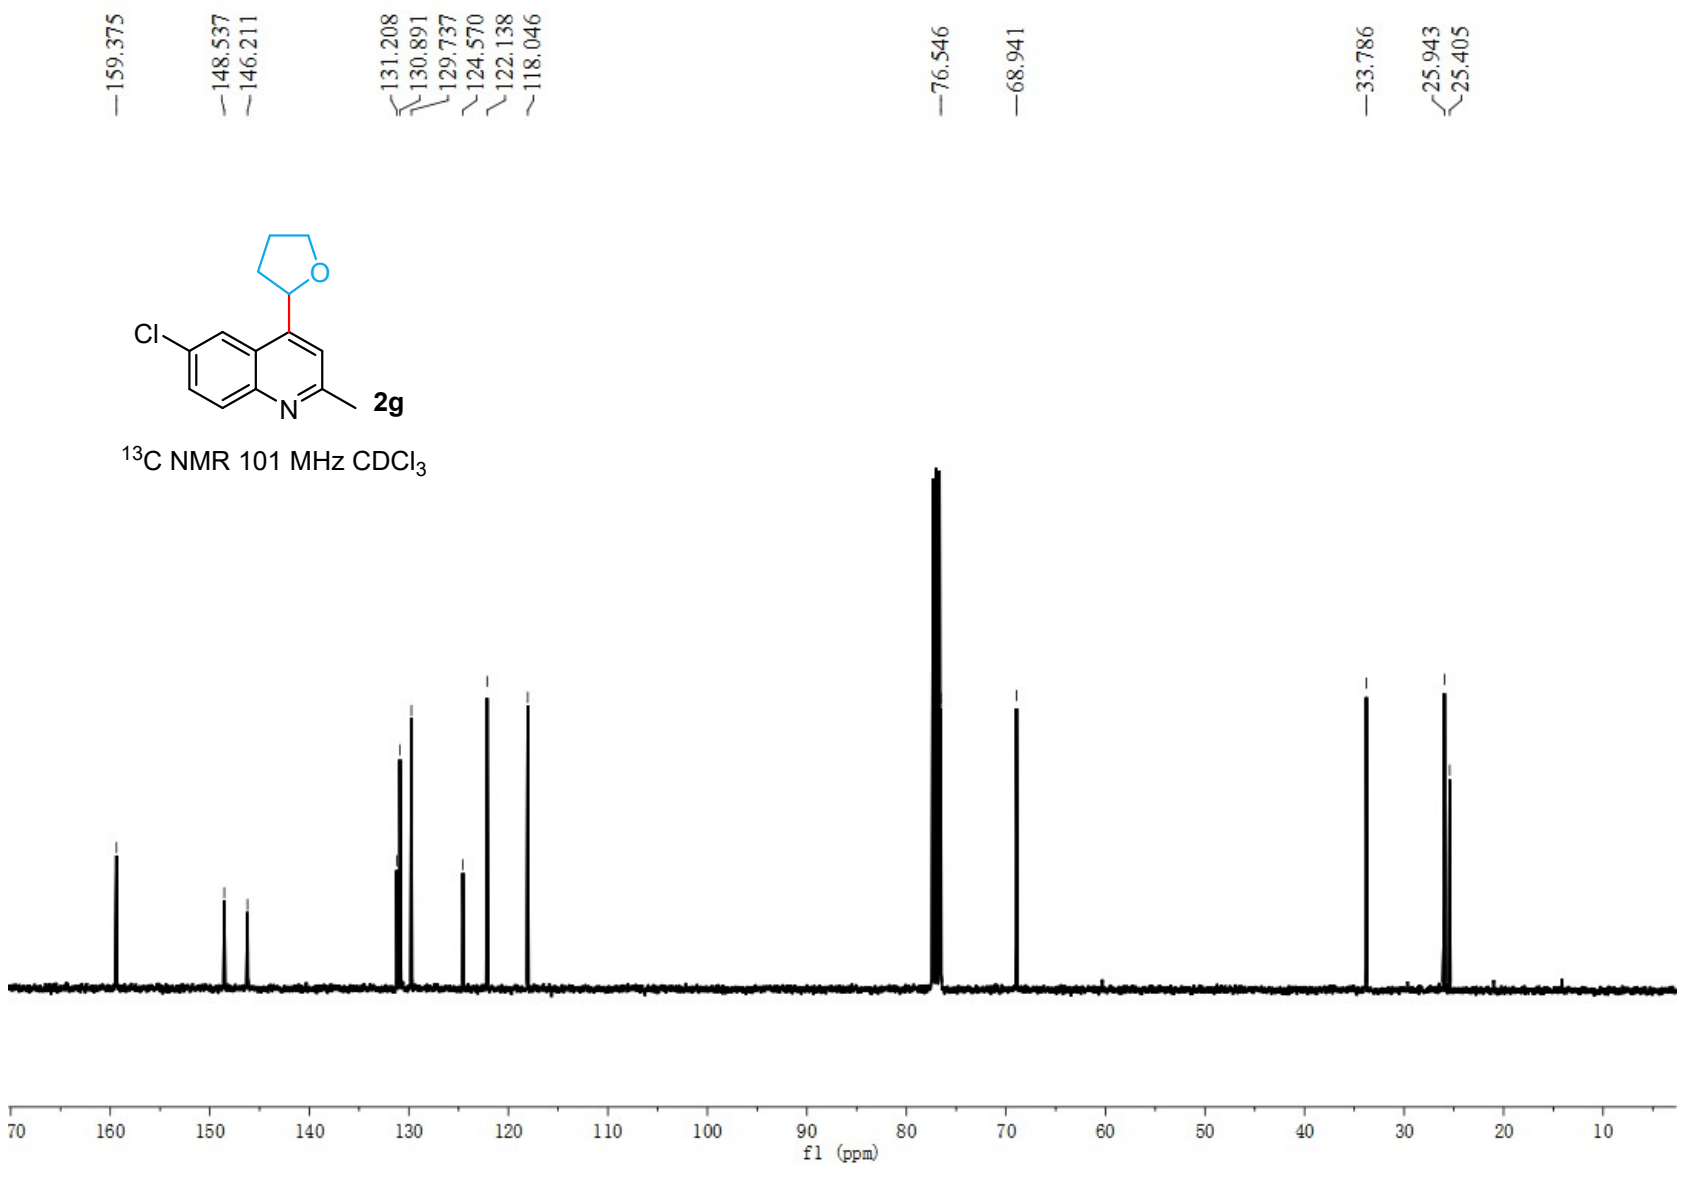

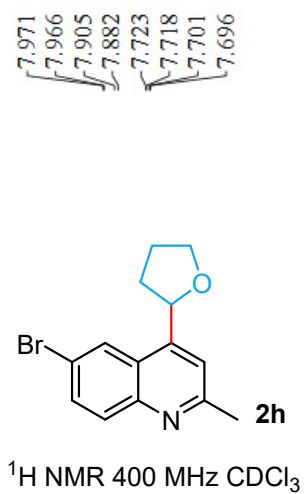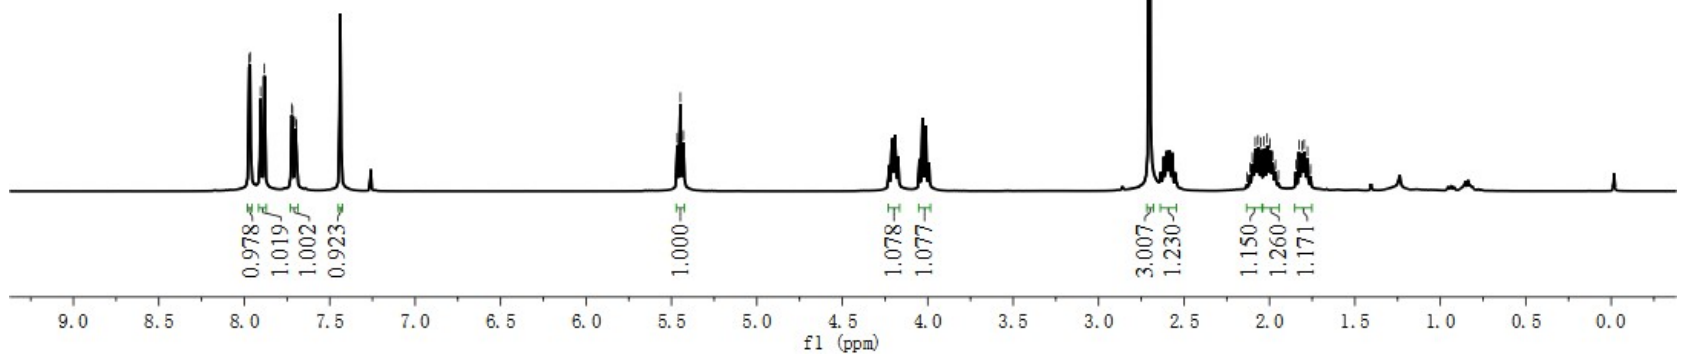

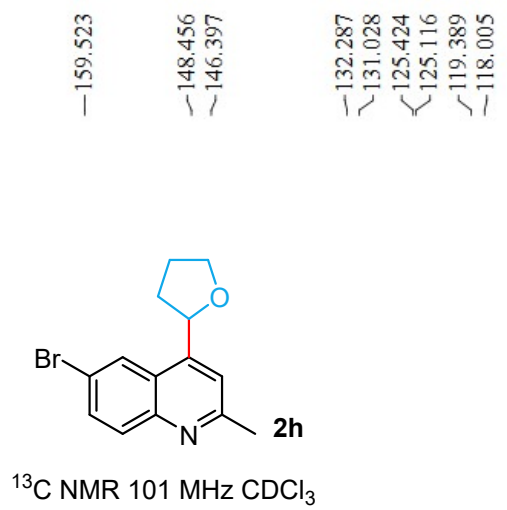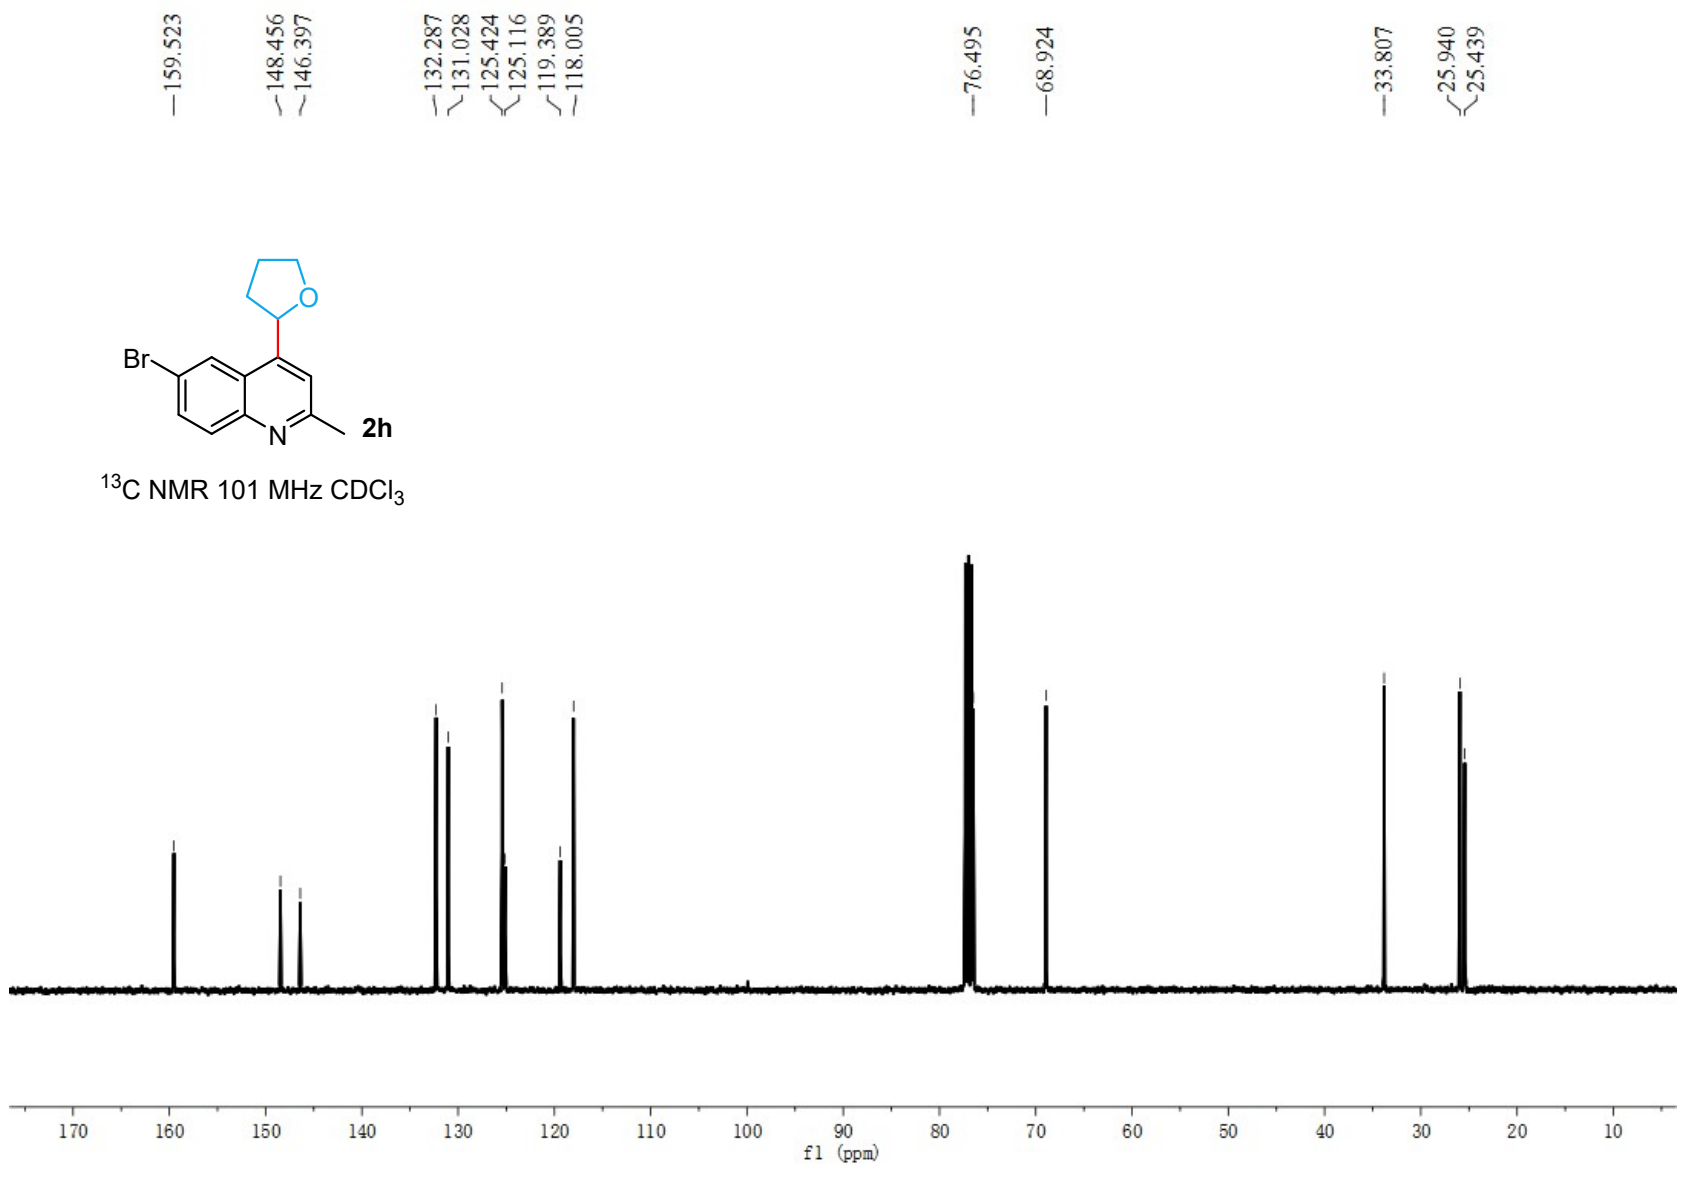



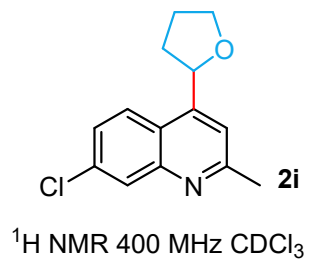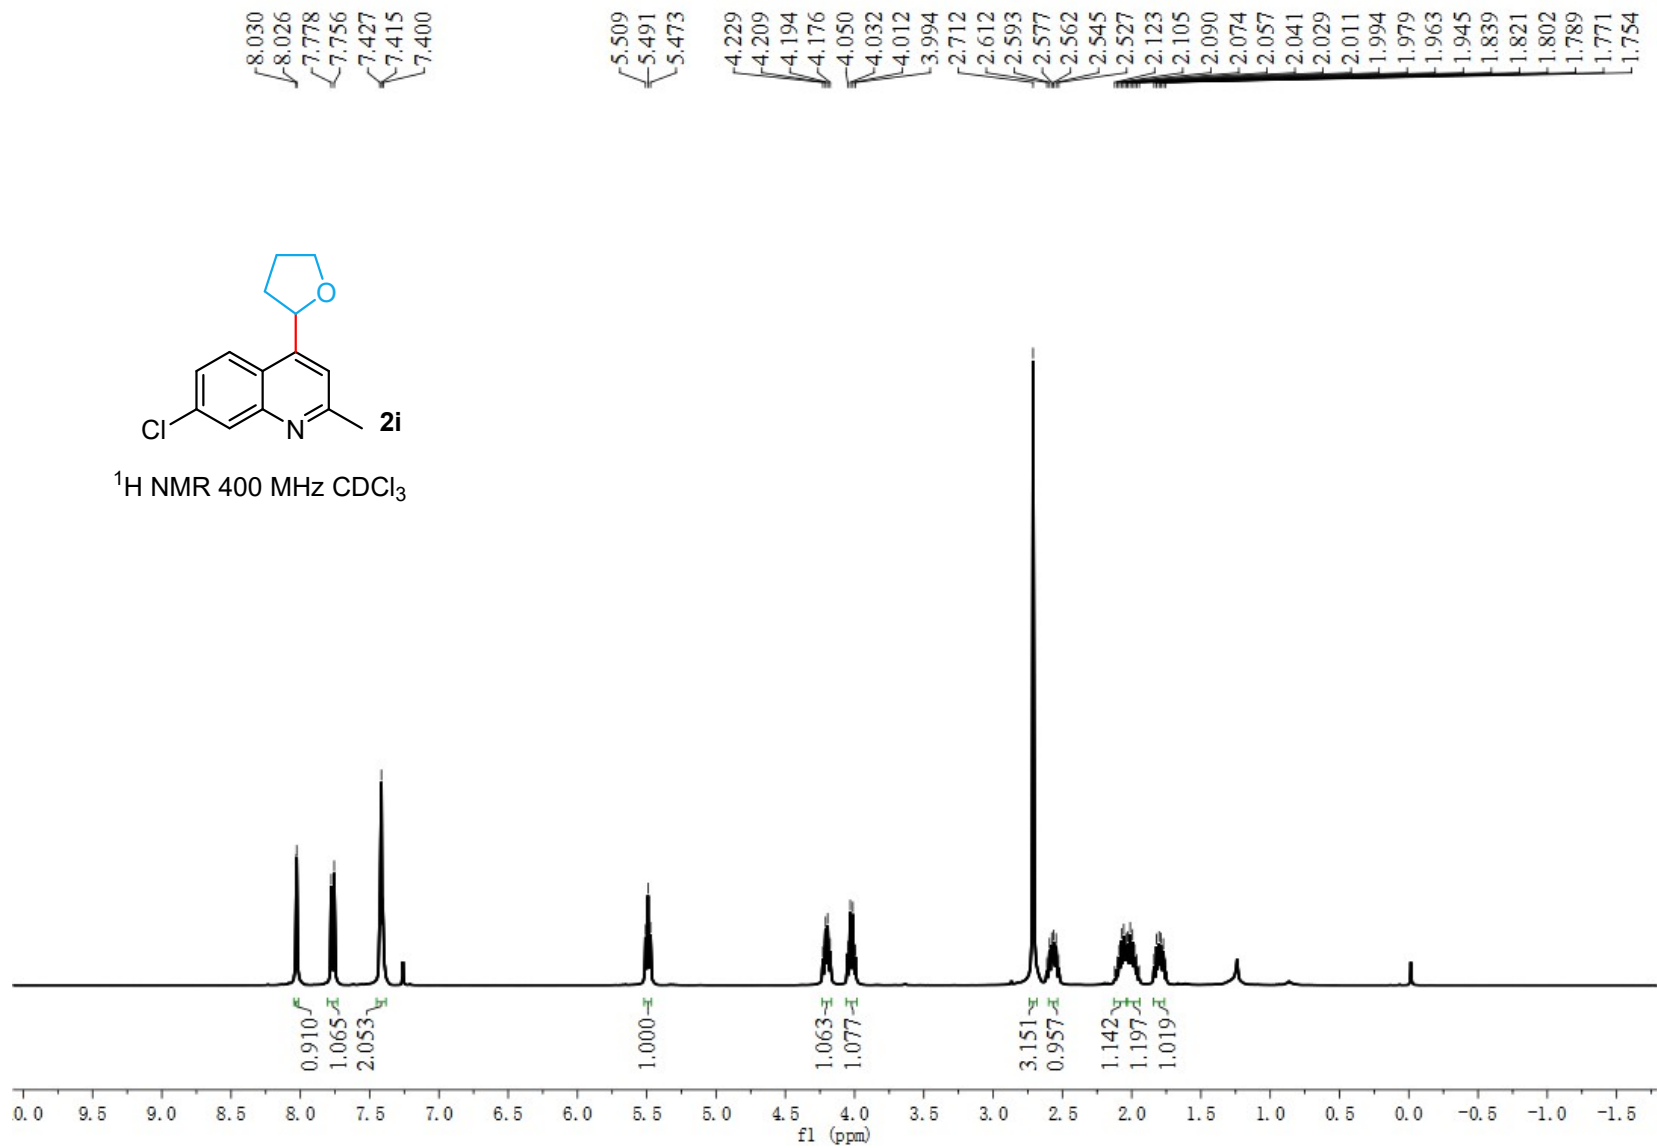

—160.334  
—149.362  
—148.381  
—134.750  
—128.309  
—126.341  
—124.324  
—122.256  
—117.441

—76.612  
—68.952

—33.845  
—25.936  
—25.454

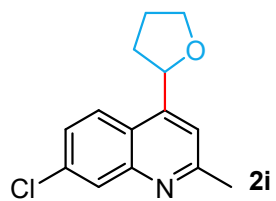

<sup>13</sup>C NMR 101 MHz CDCl<sub>3</sub>

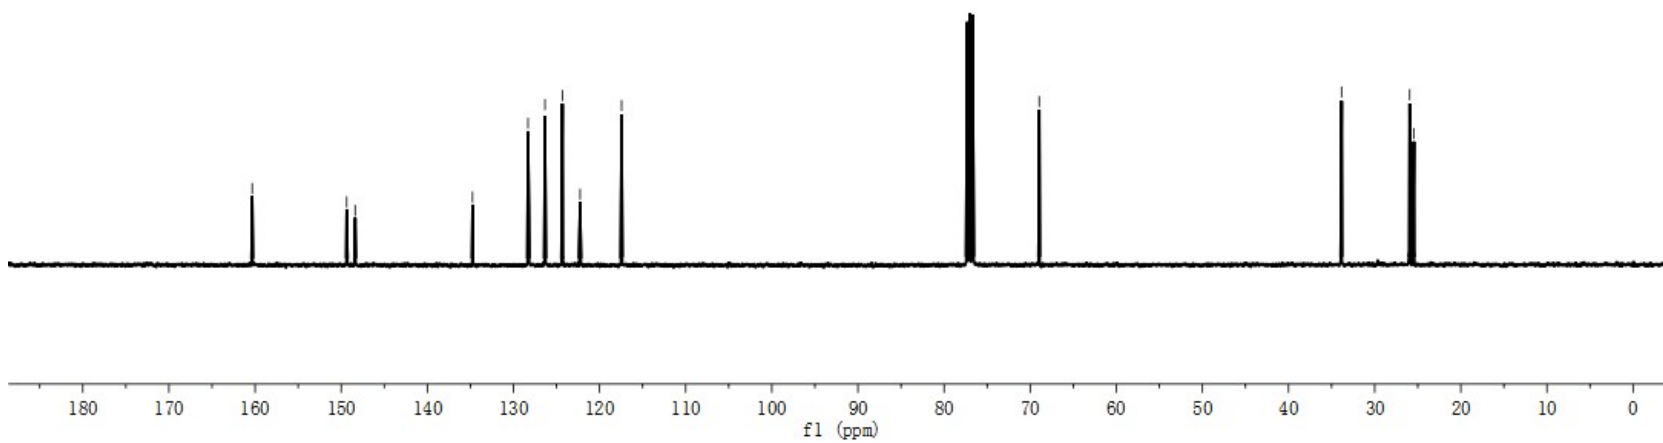

7.795  
7.785  
7.777  
7.764  
7.510  
7.407  
7.387  
7.367

5.562  
5.544  
5.526

4.252  
4.233  
4.218  
4.200  
4.067  
4.049  
4.030  
4.011

2.817  
2.643  
2.624  
2.607  
2.593  
2.576  
2.557  
2.133  
2.116  
2.101  
2.084  
2.068  
2.053  
2.035  
2.017  
1.999  
1.985  
1.968  
1.951  
1.855  
1.838  
1.820  
1.807  
1.788  
1.771

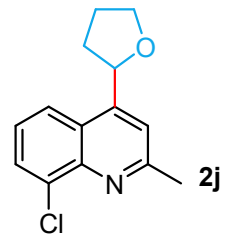

<sup>1</sup>H NMR 400 MHz CDCl<sub>3</sub>

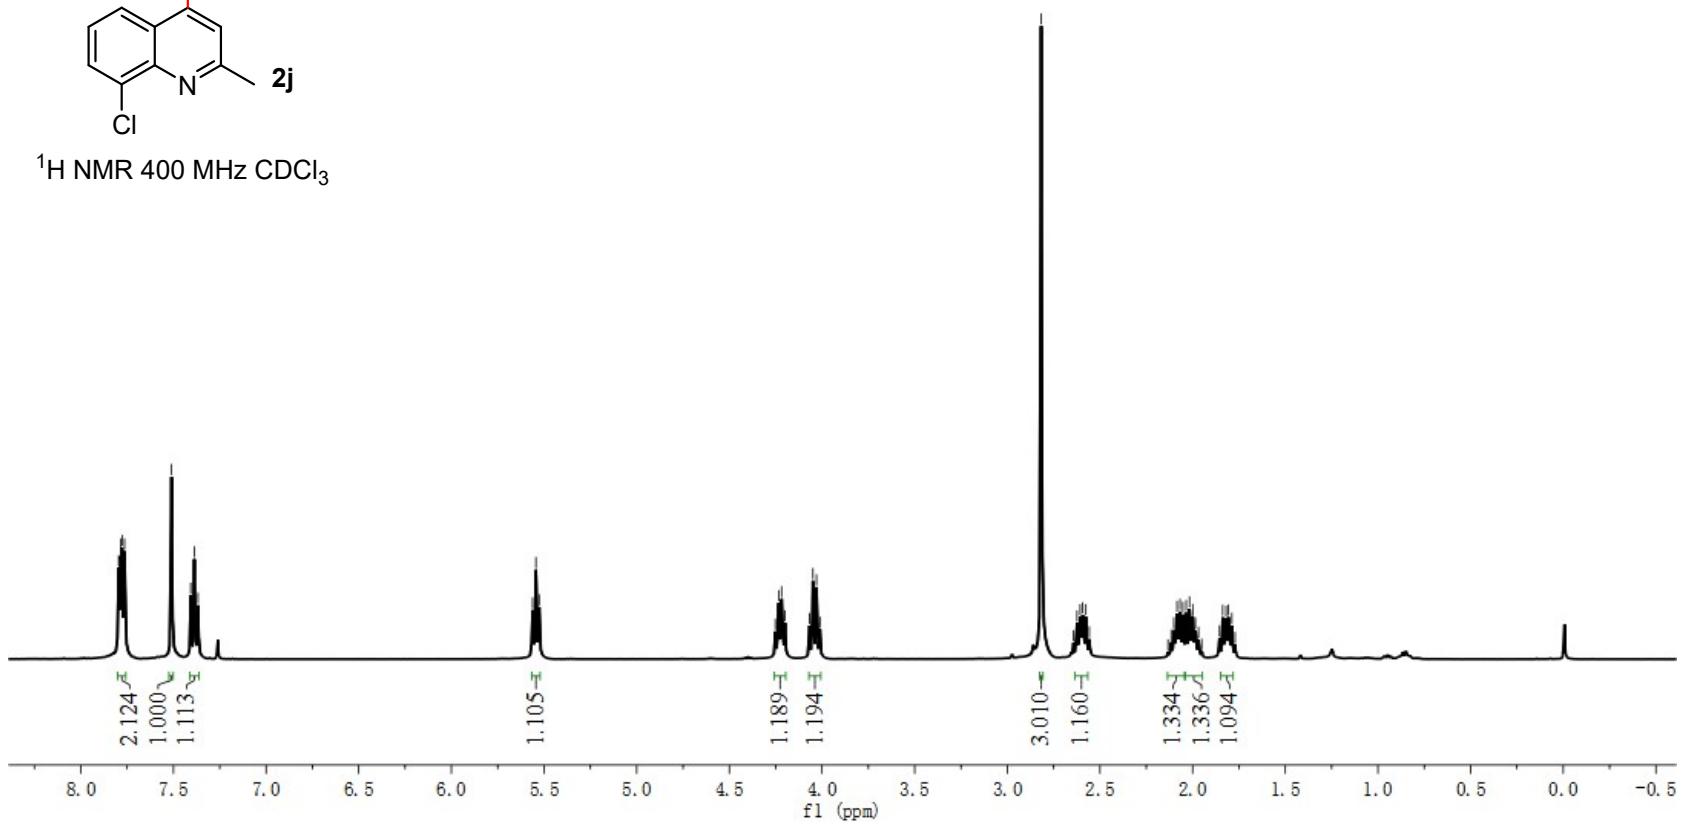

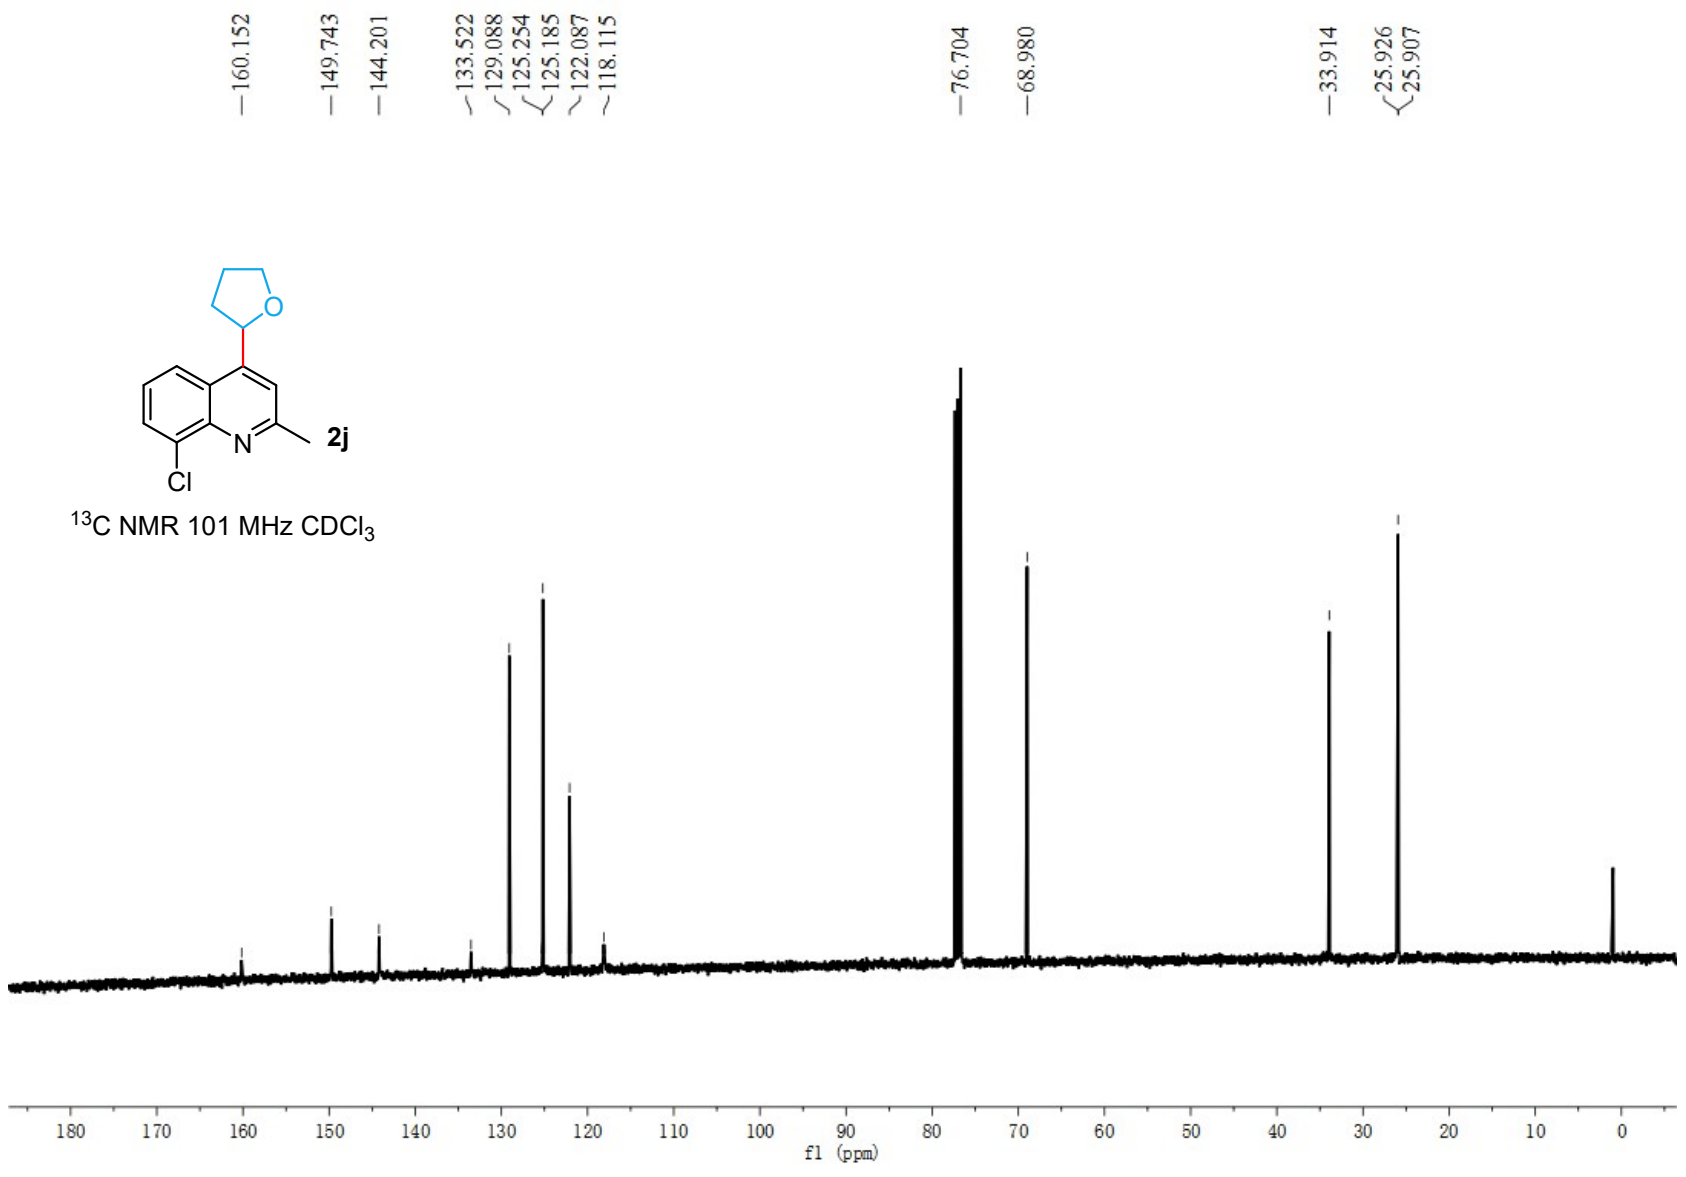

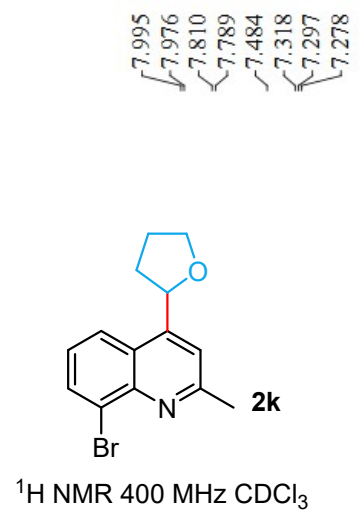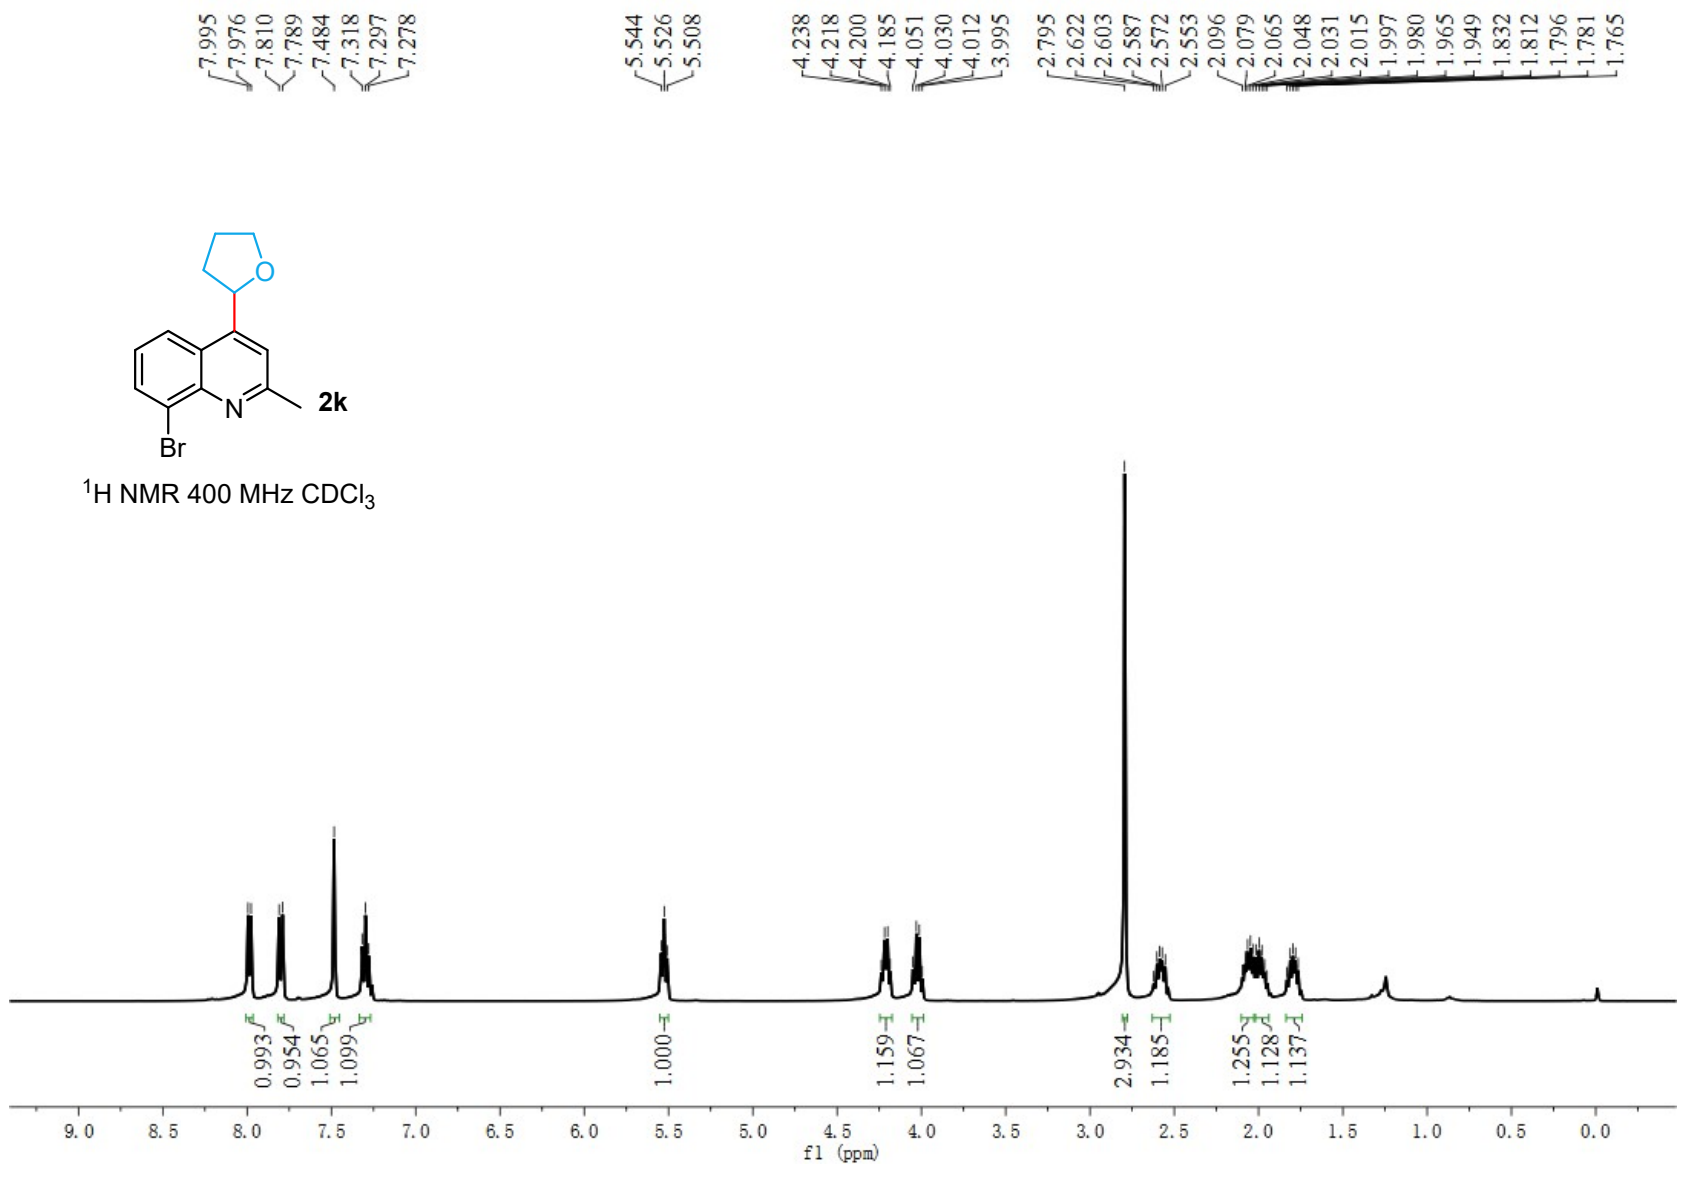

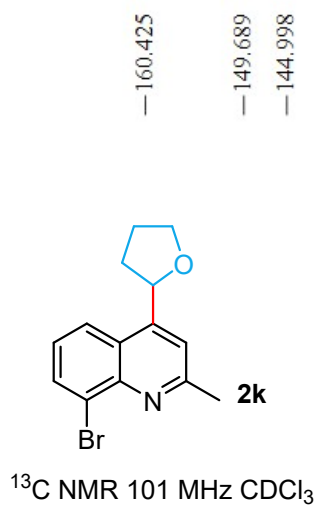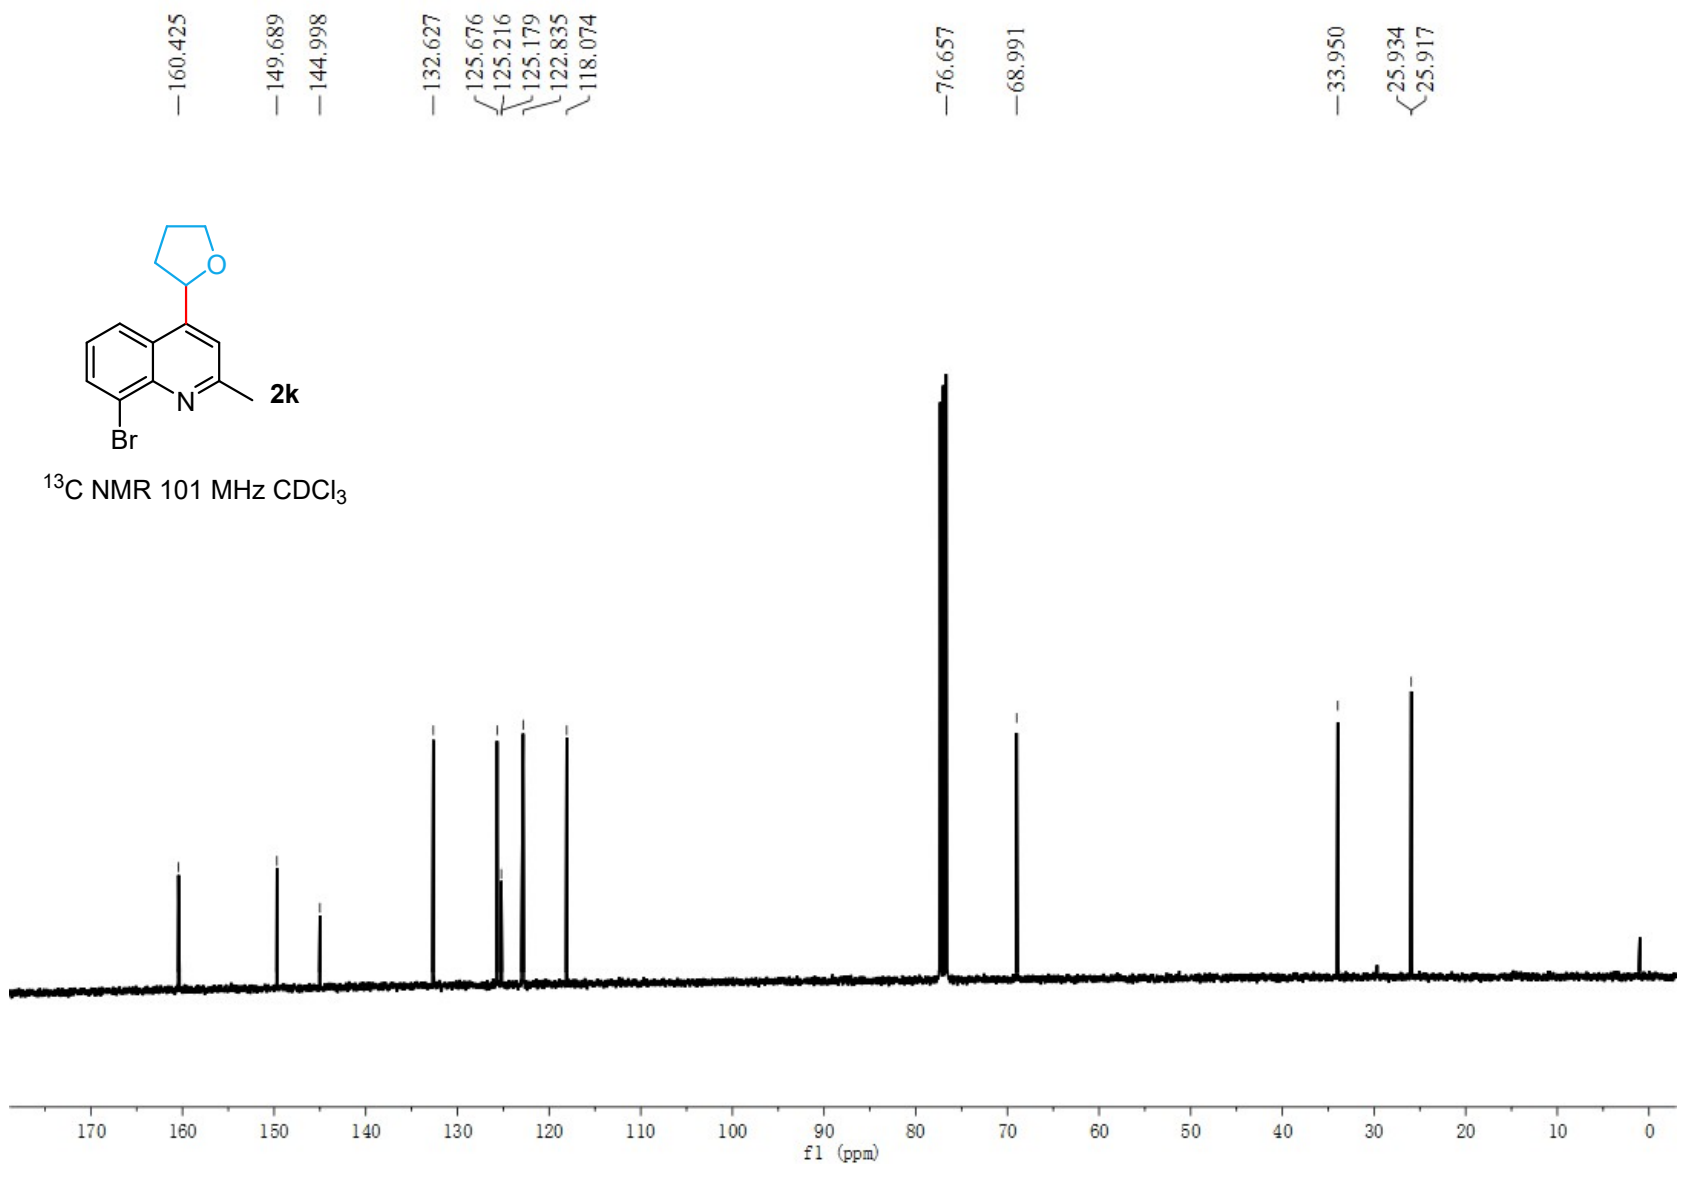

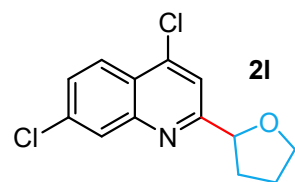

$^1\text{H NMR}$  400 MHz  $\text{CDCl}_3$

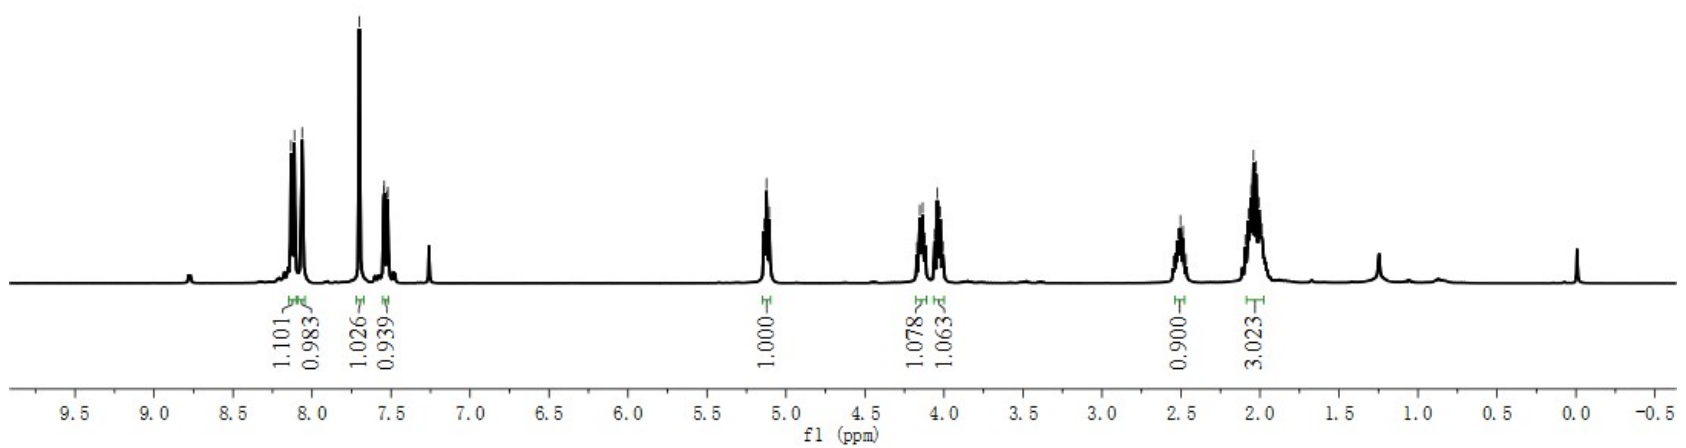

8.134  
8.111  
8.062  
7.701  
7.546  
7.543  
7.524  
7.521

5.139  
5.123  
5.106  
4.172  
4.154  
4.135  
4.119  
4.060  
4.042  
4.024  
4.006

2.530  
2.519  
2.503  
2.486  
2.467  
2.074  
2.057  
2.041  
2.026  
2.006  
1.988

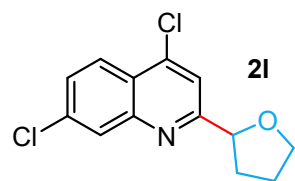

$^{13}\text{C}$  NMR 101 MHz  $\text{CDCl}_3$

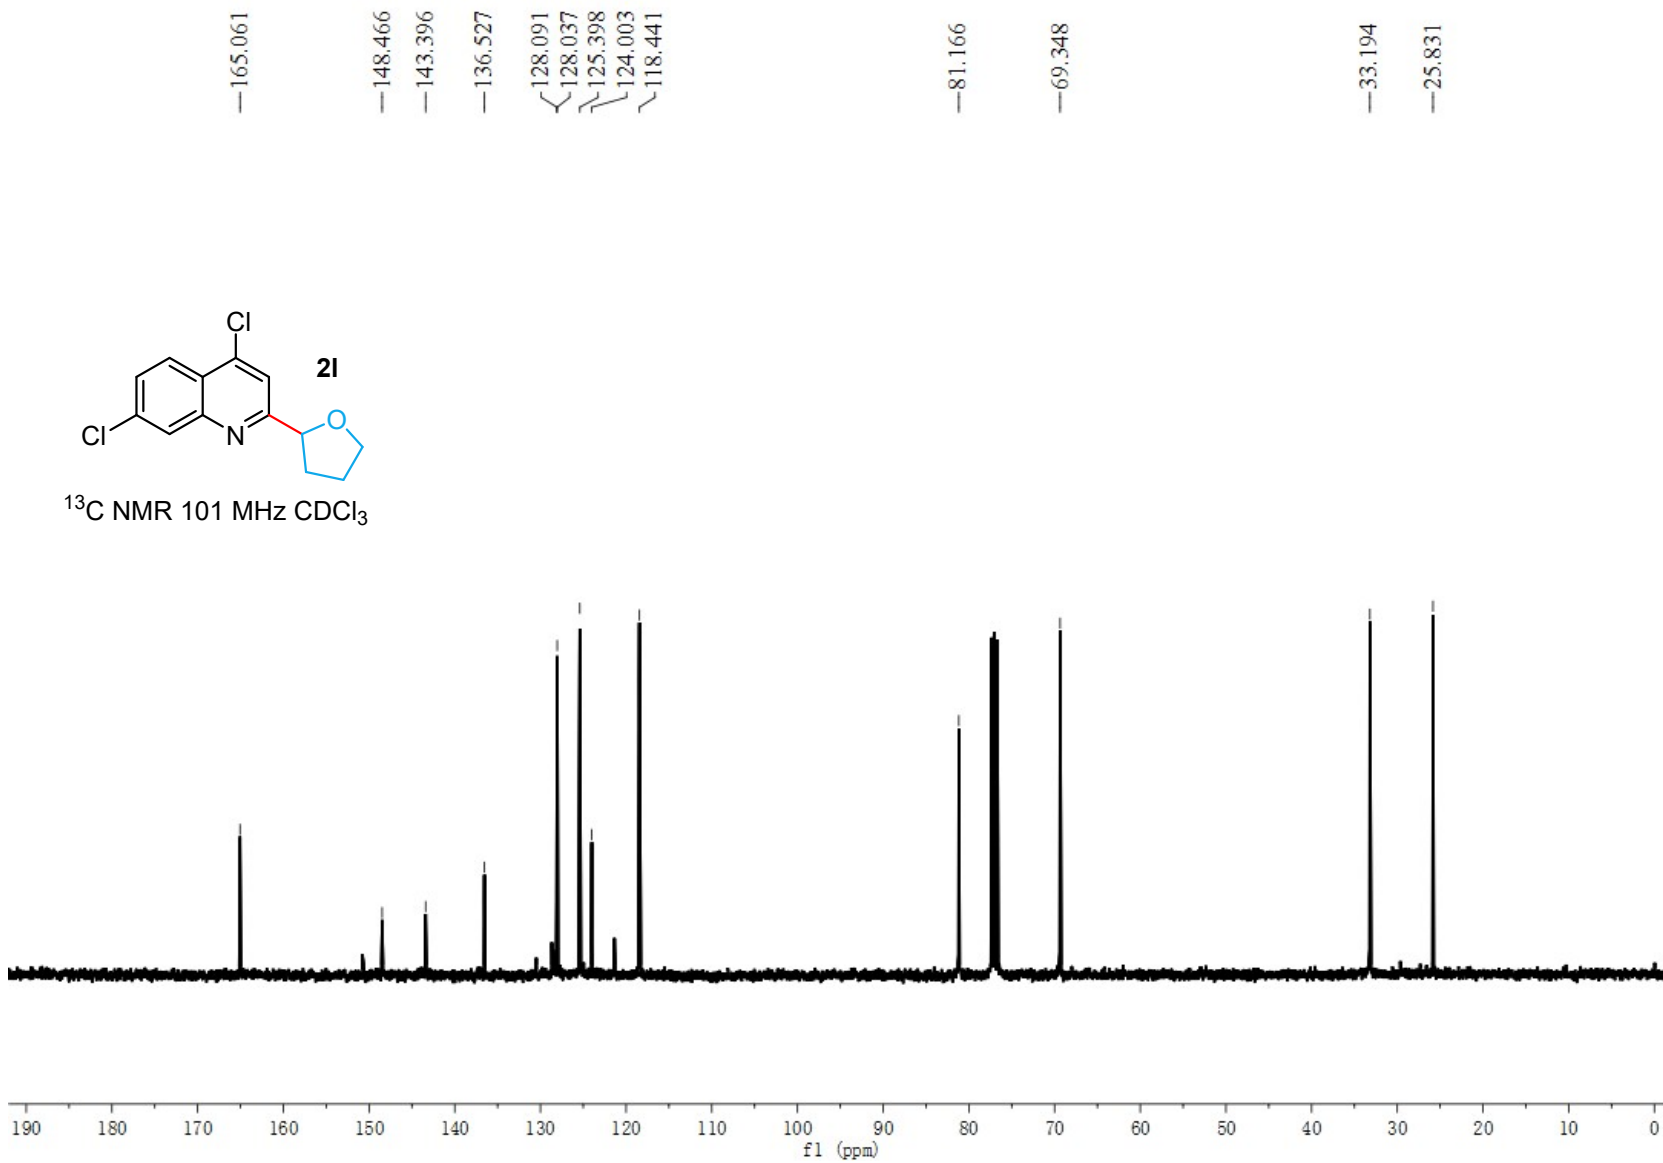



8.959  
8.851  
8.829  
8.331  
8.309  
8.303  
8.281  
8.014  
7.993  
7.886  
7.866  
7.769  
7.753  
7.738  
7.603  
7.591  
7.584  
5.774  
5.768  
5.690  
5.672

4.421  
4.404  
4.385  
4.368  
4.160  
4.143  
4.123  
4.105  
2.711  
2.693  
2.676  
2.663  
2.646  
2.628  
2.169  
2.152  
2.134  
2.117  
2.100  
2.054  
2.045  
2.037  
2.018  
2.006  
1.988  
1.969

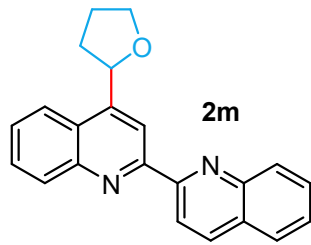

$^1\text{H}$  NMR 400 MHz  $\text{CDCl}_3$

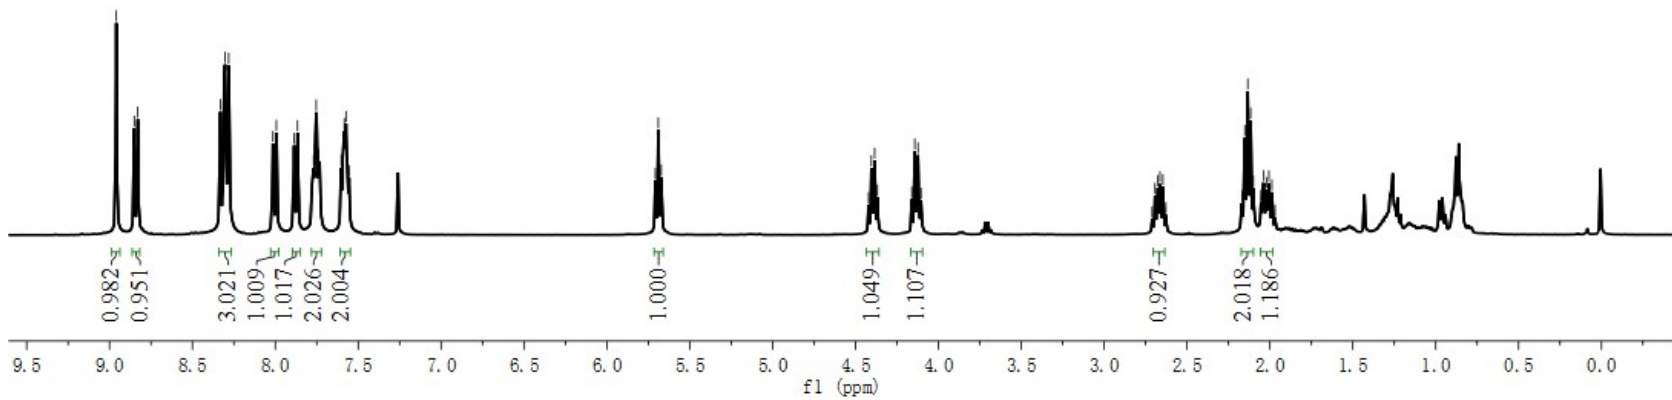

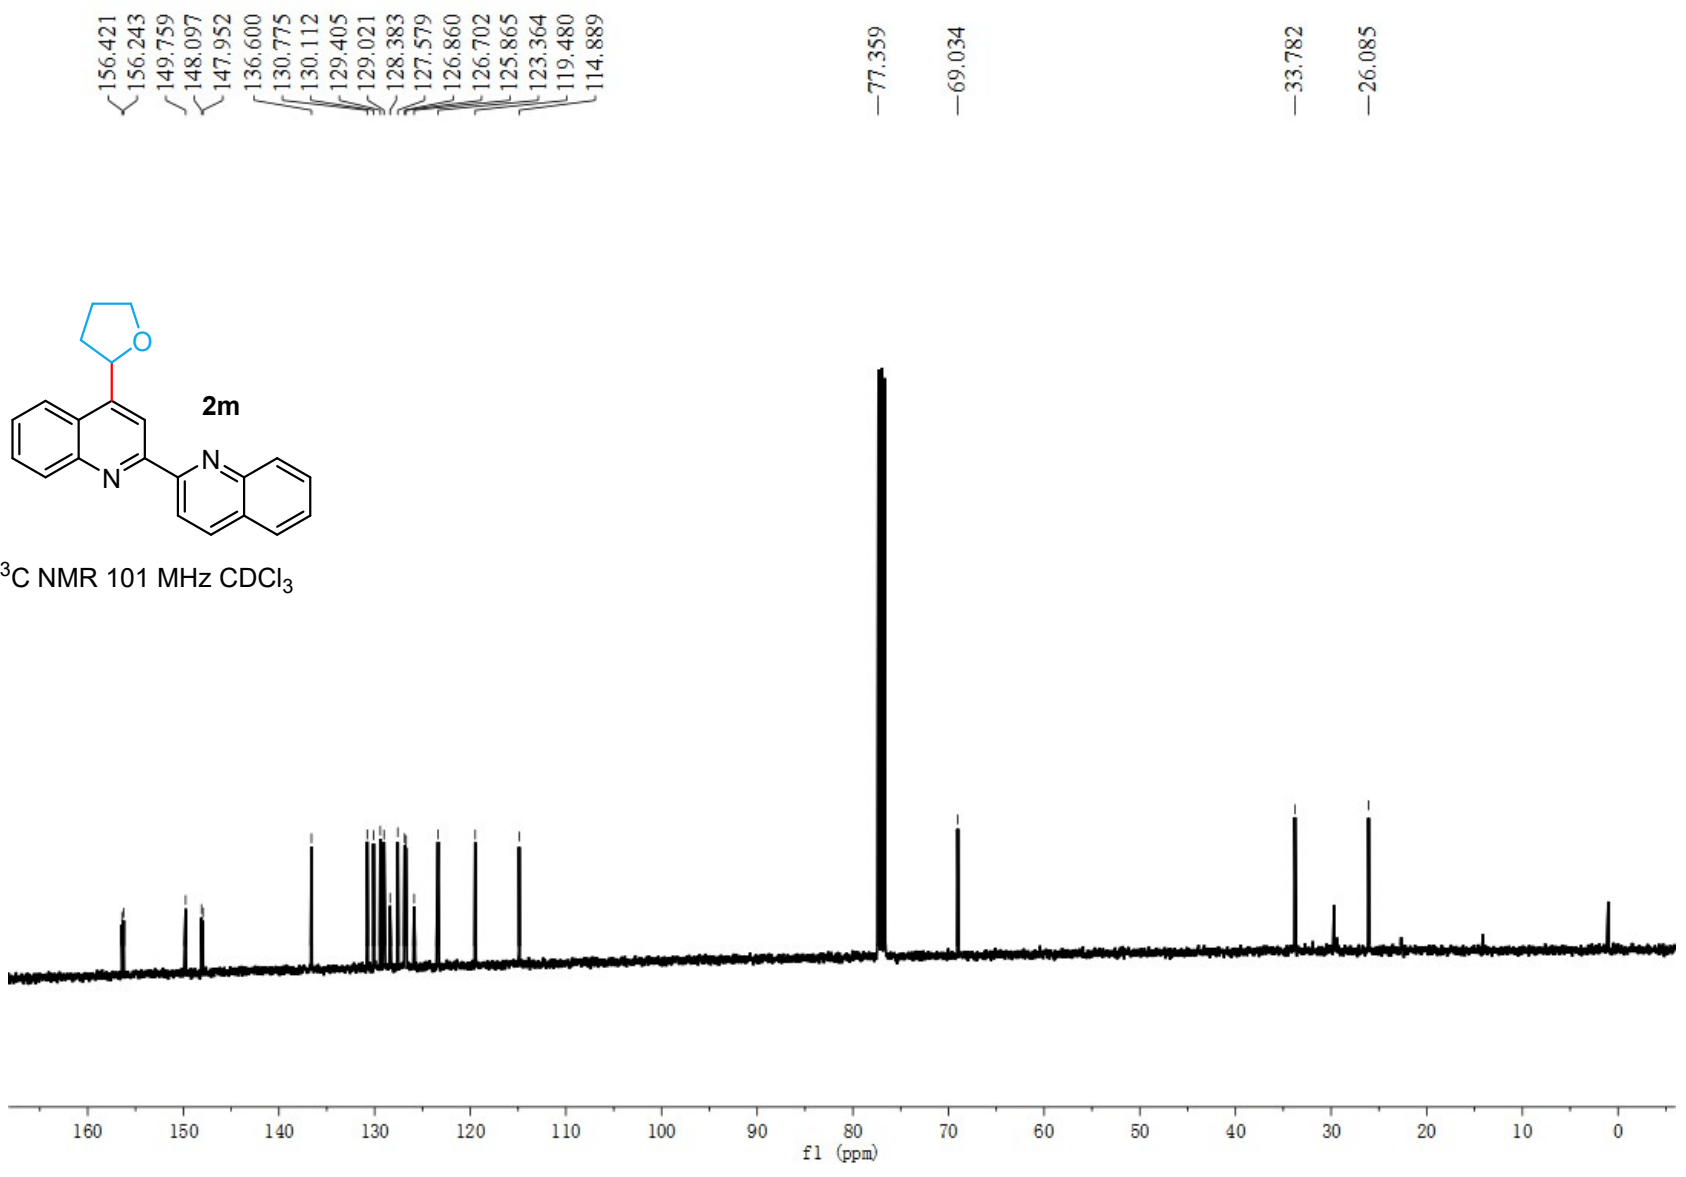

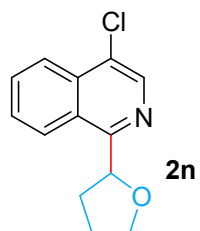

$^1\text{H NMR}$  400 MHz  $\text{CDCl}_3$

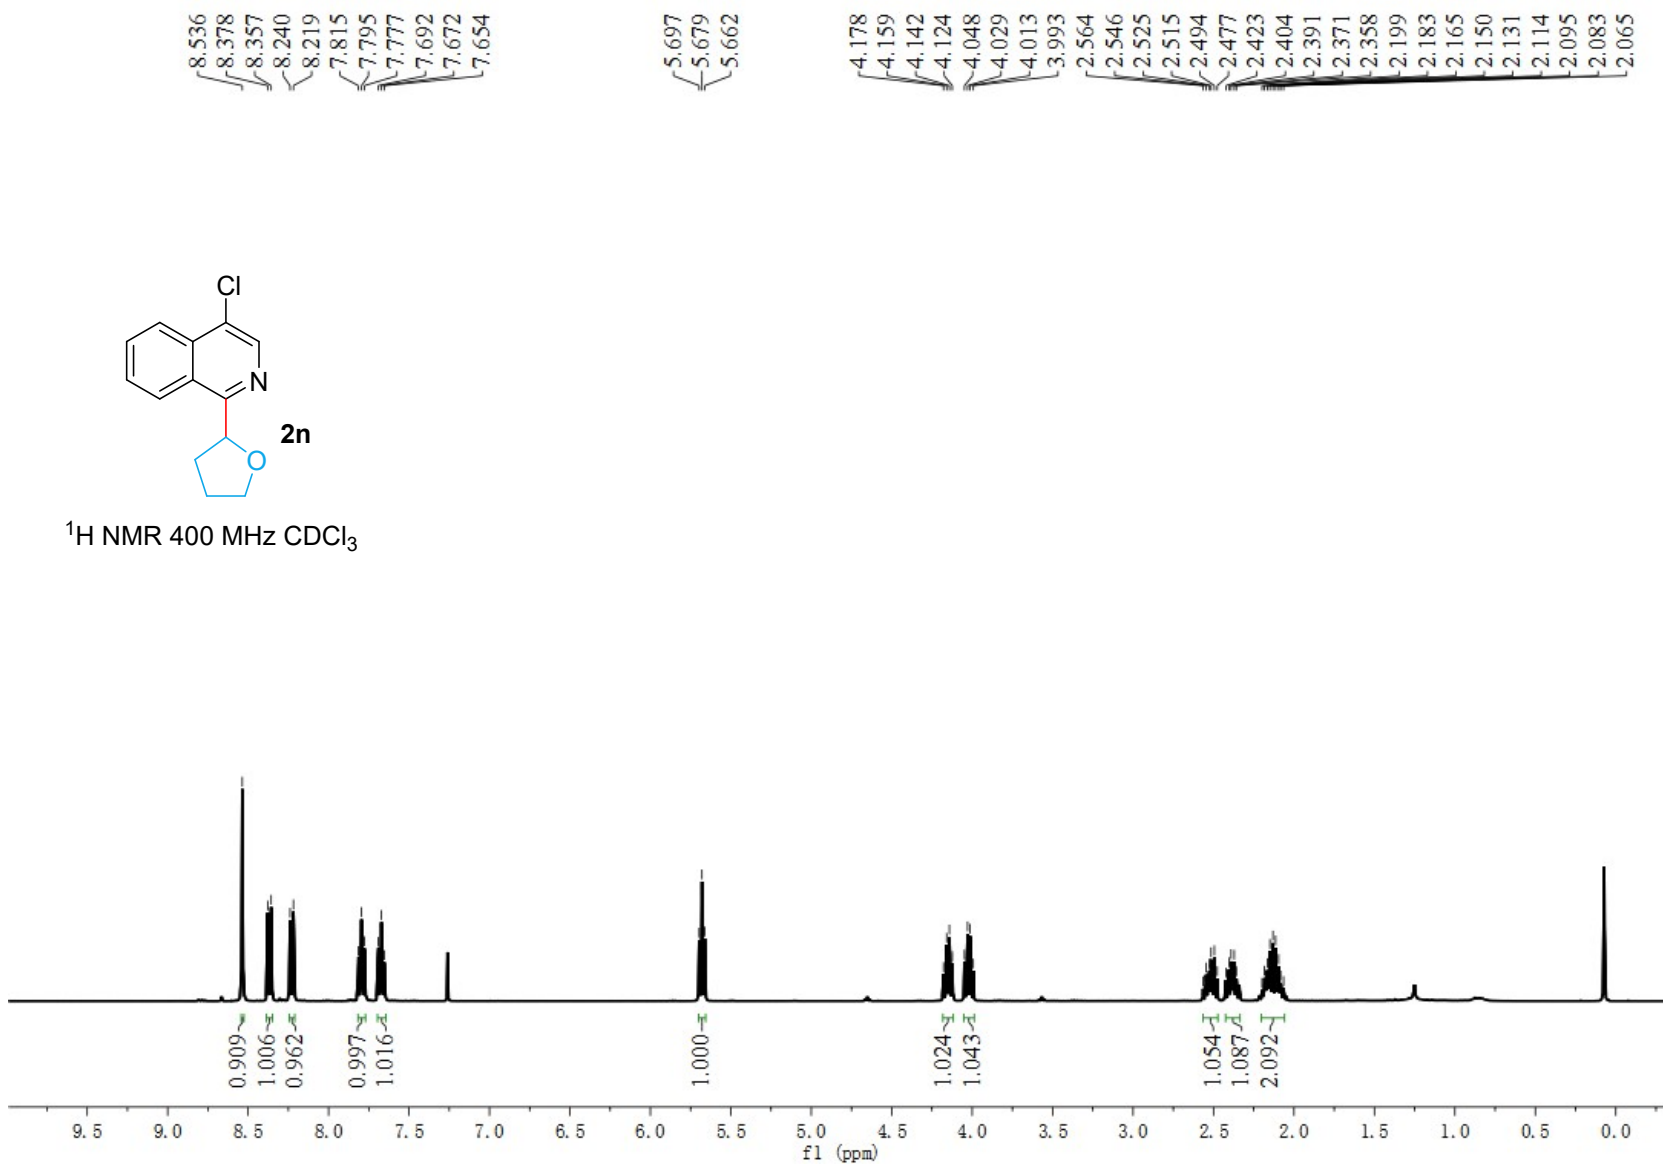

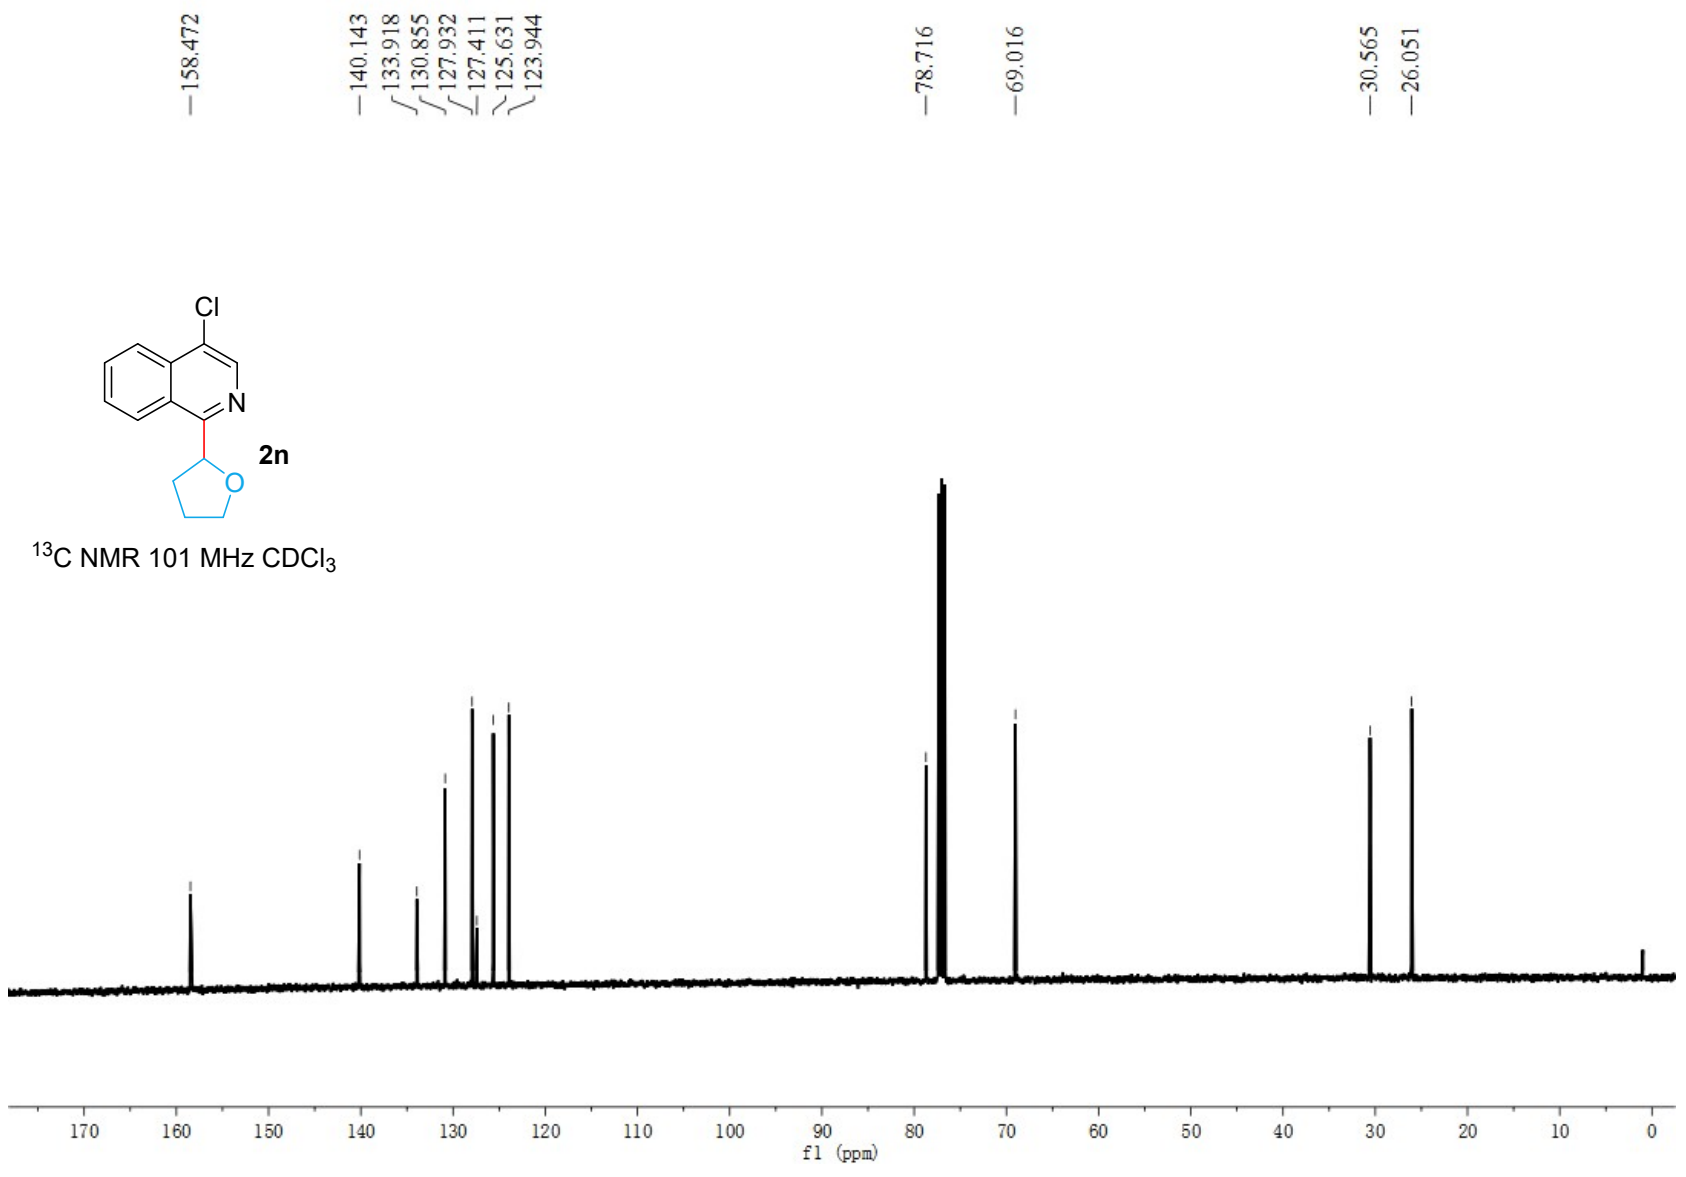

8.669  
8.347  
8.326  
8.190  
8.168  
7.792  
7.774  
7.755  
7.673  
7.653  
7.635

5.682  
5.664  
5.647

4.169  
4.150  
4.133  
4.114  
4.040  
4.021  
4.005  
3.985  
2.555  
2.537  
2.517  
2.506  
2.486  
2.468  
2.416  
2.397  
2.383  
2.364  
2.351  
2.332  
2.203  
2.188  
2.173  
2.156  
2.139  
2.121  
2.104  
2.085  
2.073  
2.055  
2.036

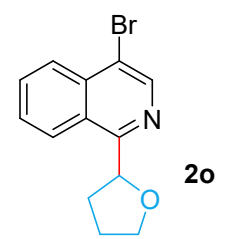

<sup>1</sup>H NMR 400 MHz CDCl<sub>3</sub>

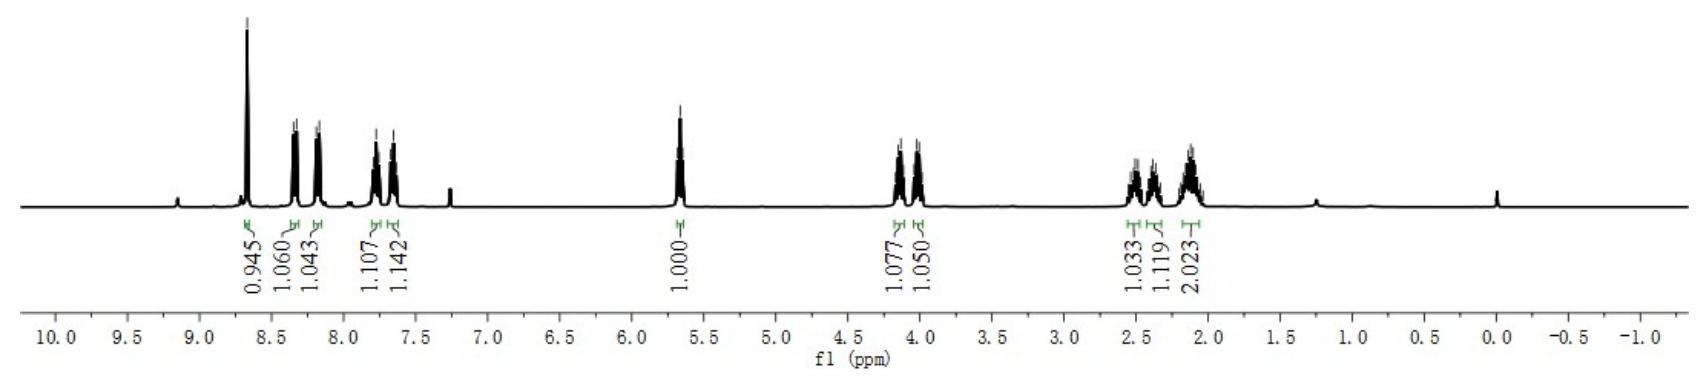

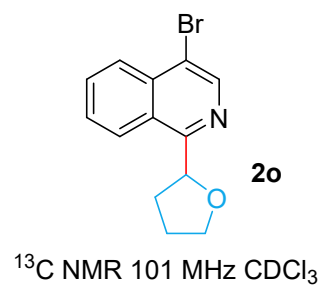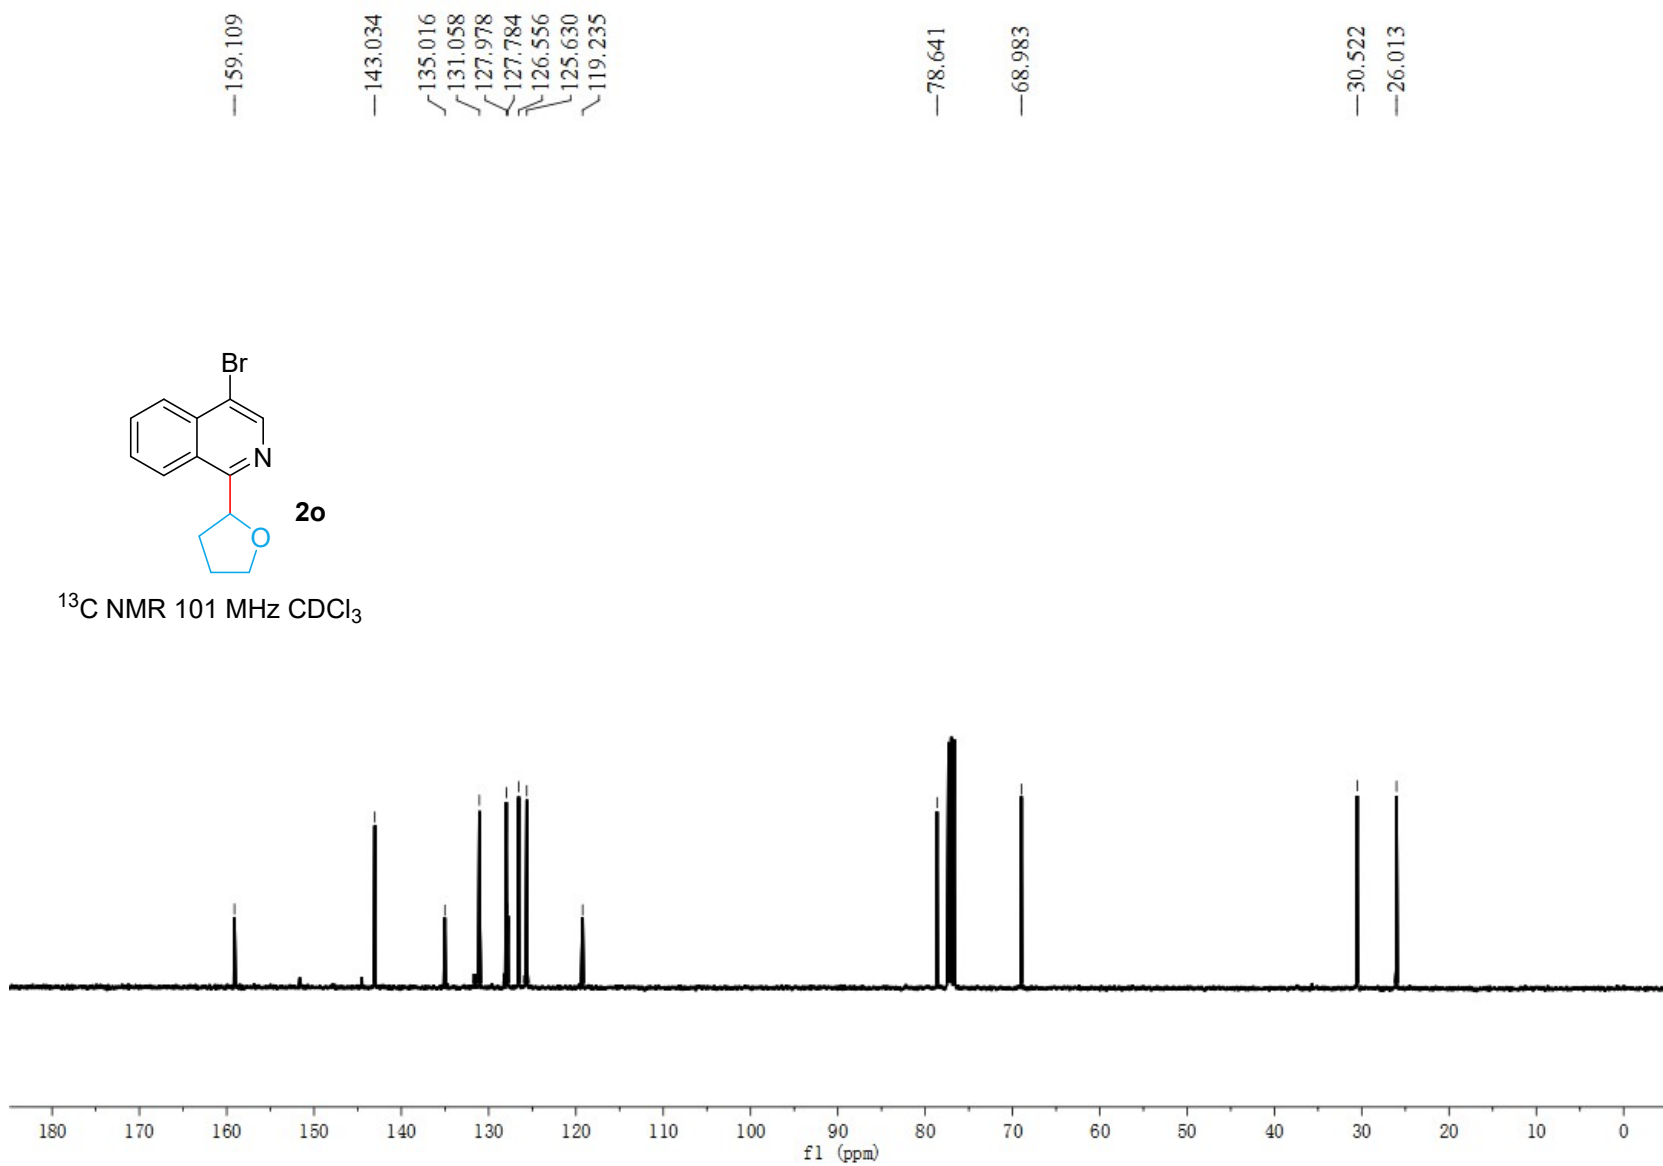

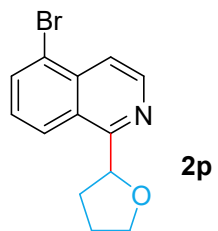

$^1\text{H NMR}$  400 MHz  $\text{CDCl}_3$

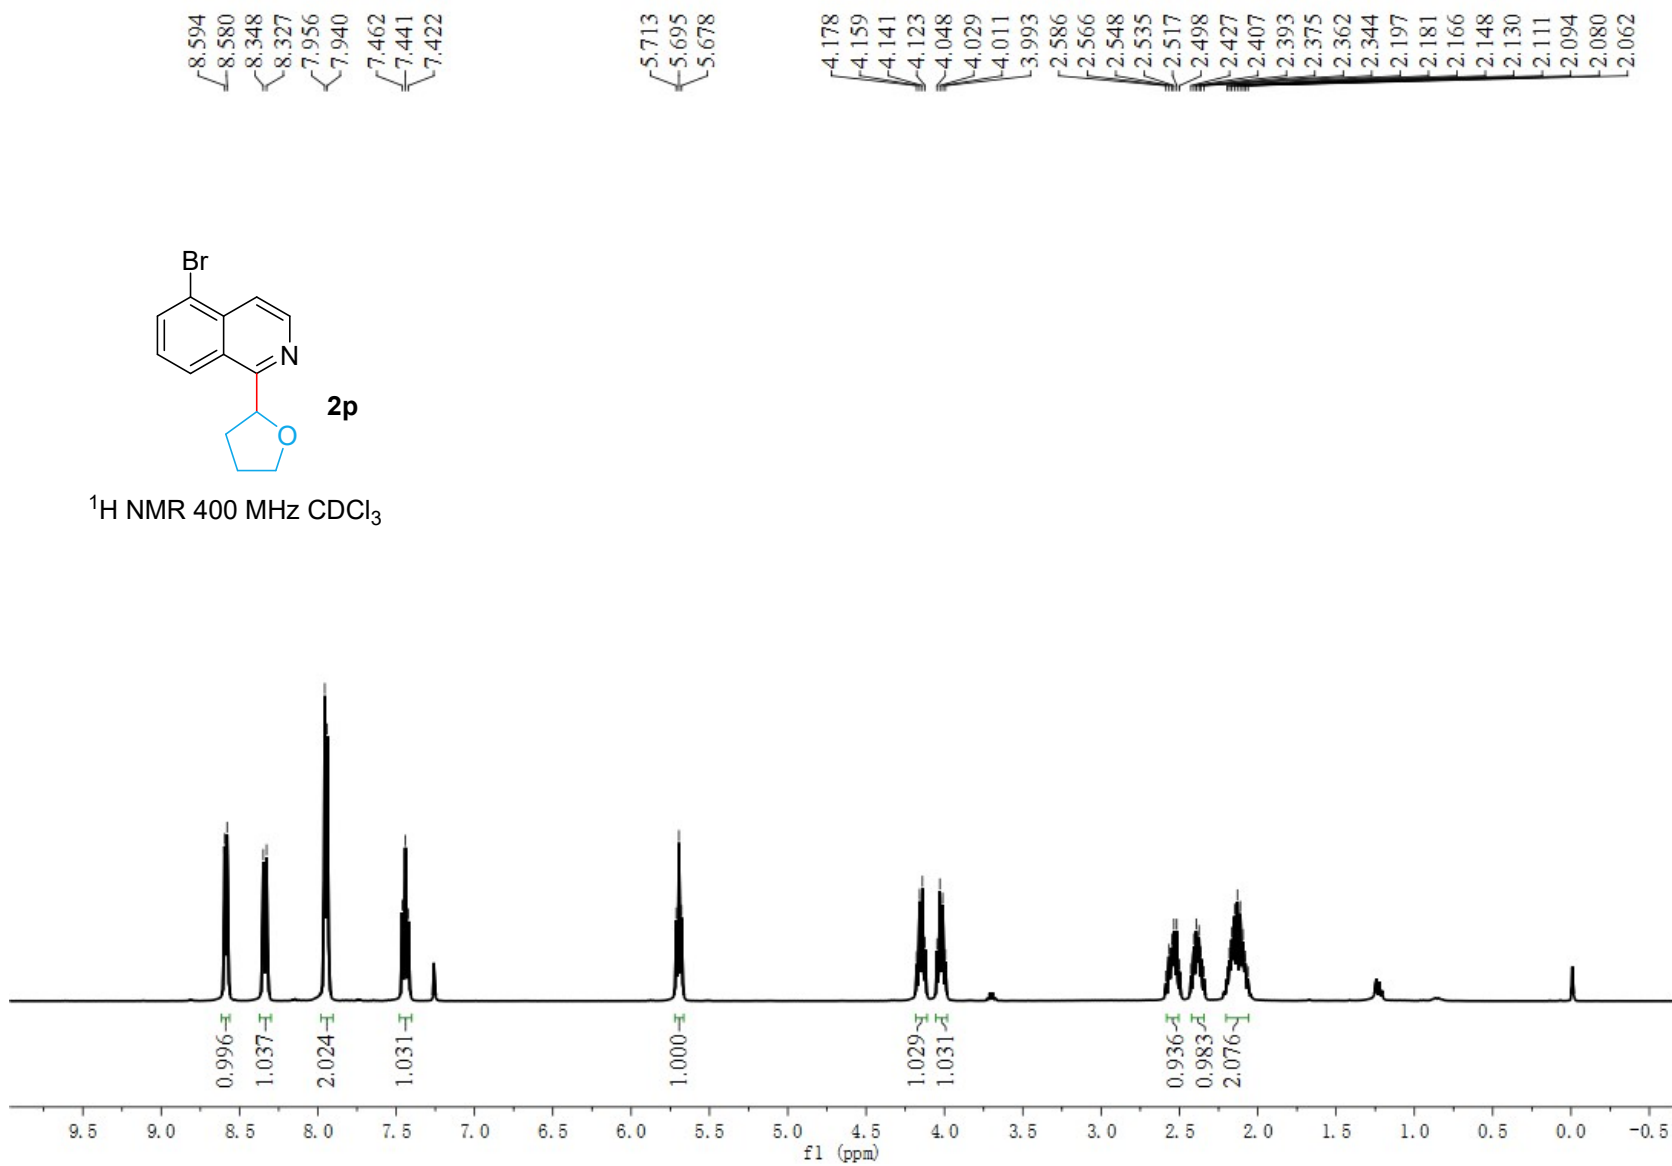

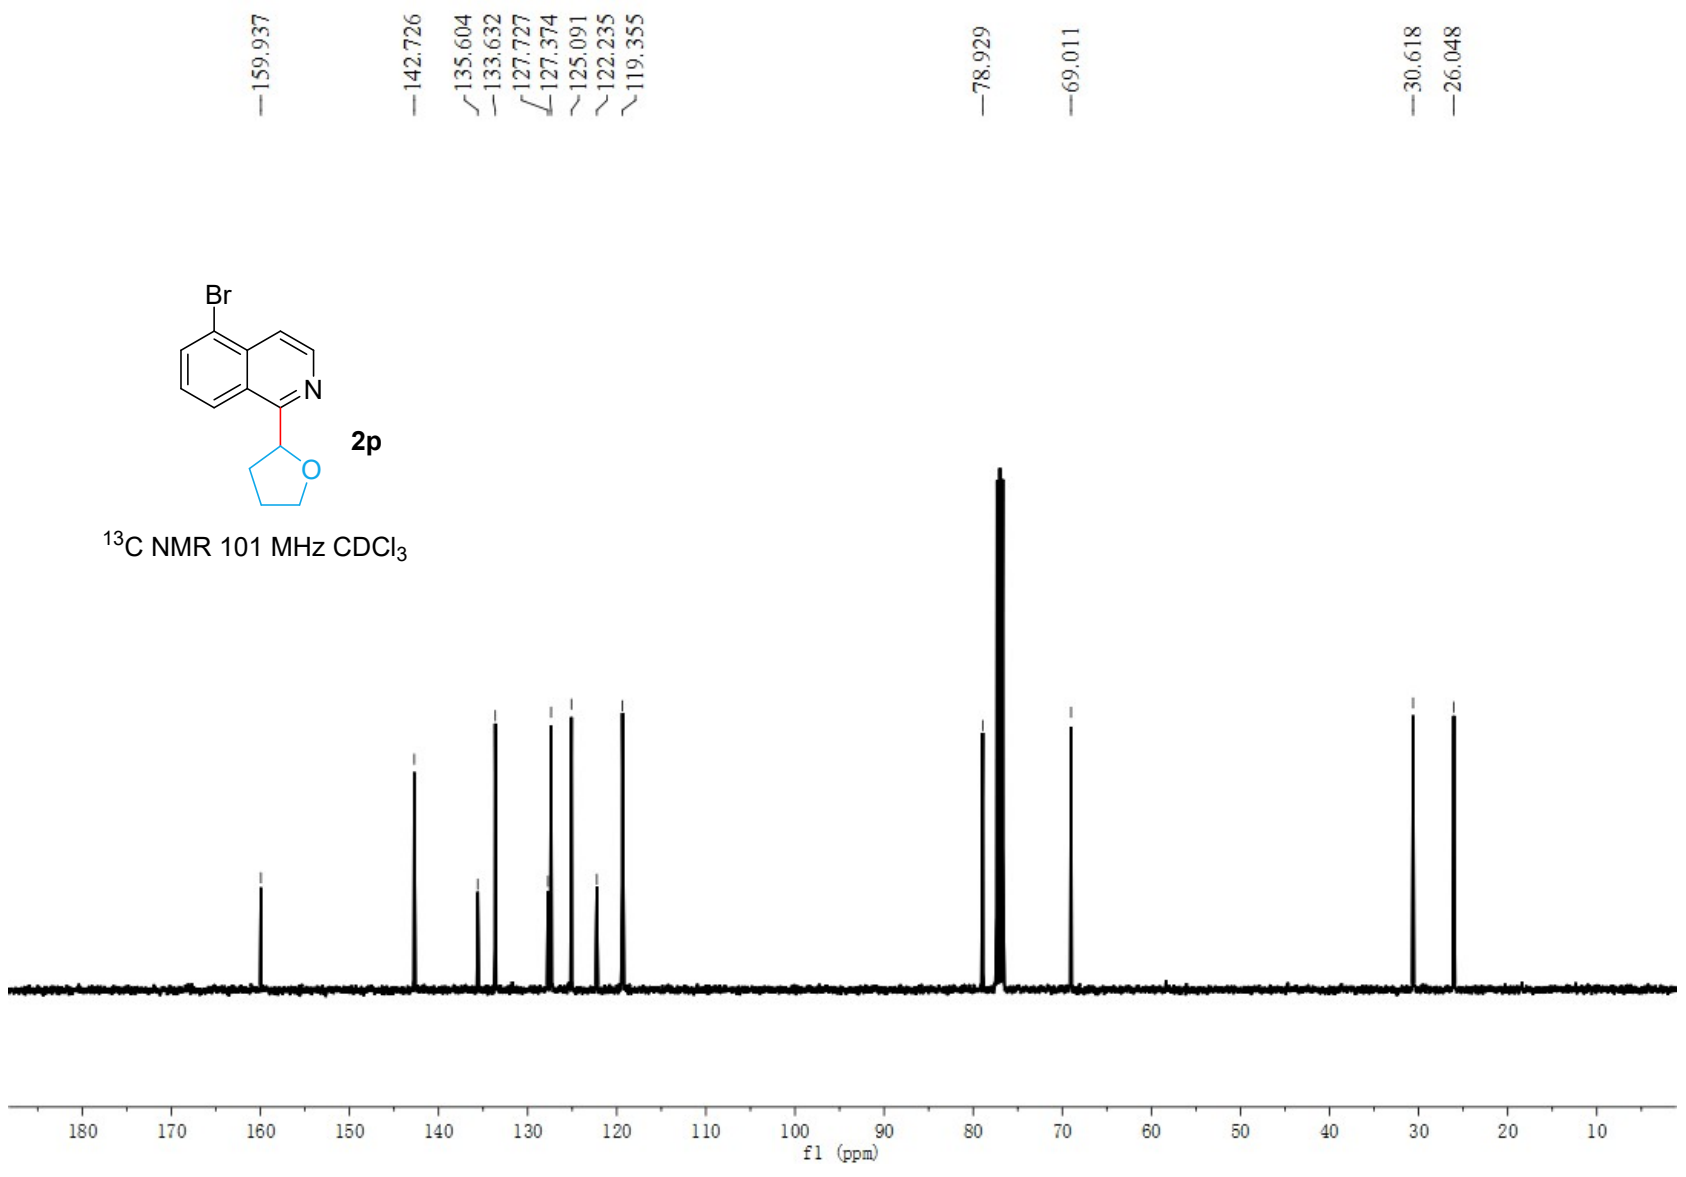



-10.394  
 8.979  
 8.964  
 8.724  
 8.702  
 8.679  
 8.664  
 8.203  
 8.185  
 7.798  
 7.778  
 7.759  
 5.732  
 5.714  
 5.697  
 4.179  
 4.160  
 4.142  
 4.124  
 4.062  
 4.042  
 4.026  
 4.007  
 2.667  
 2.649  
 2.629  
 2.617  
 2.598  
 2.579  
 2.422  
 2.409  
 2.390  
 2.377  
 2.359  
 2.225  
 2.210  
 2.194  
 2.176  
 2.157  
 2.139  
 2.121  
 2.109  
 2.090

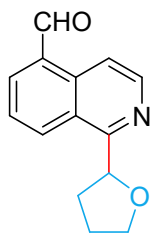

2q

<sup>1</sup>H NMR 400 MHz CDCl<sub>3</sub>

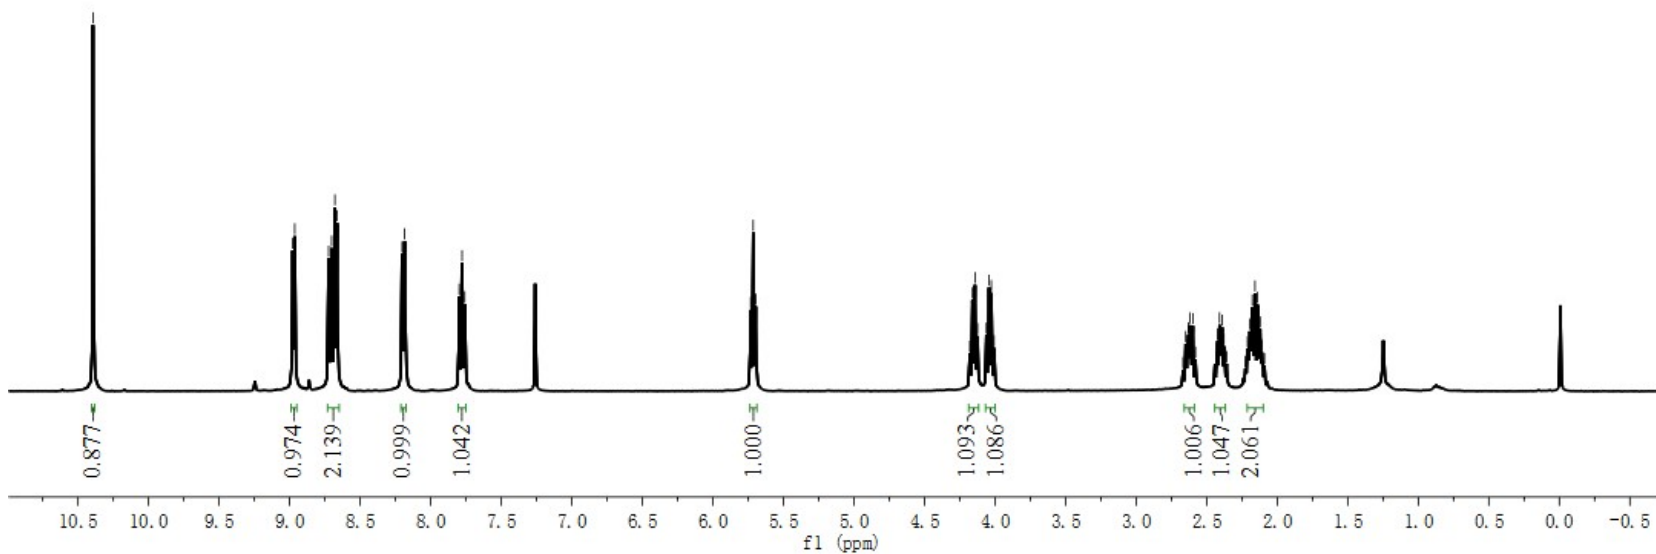

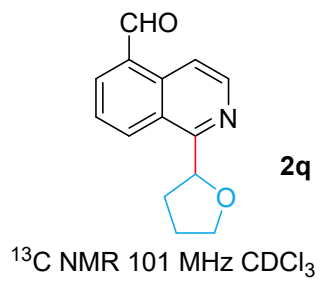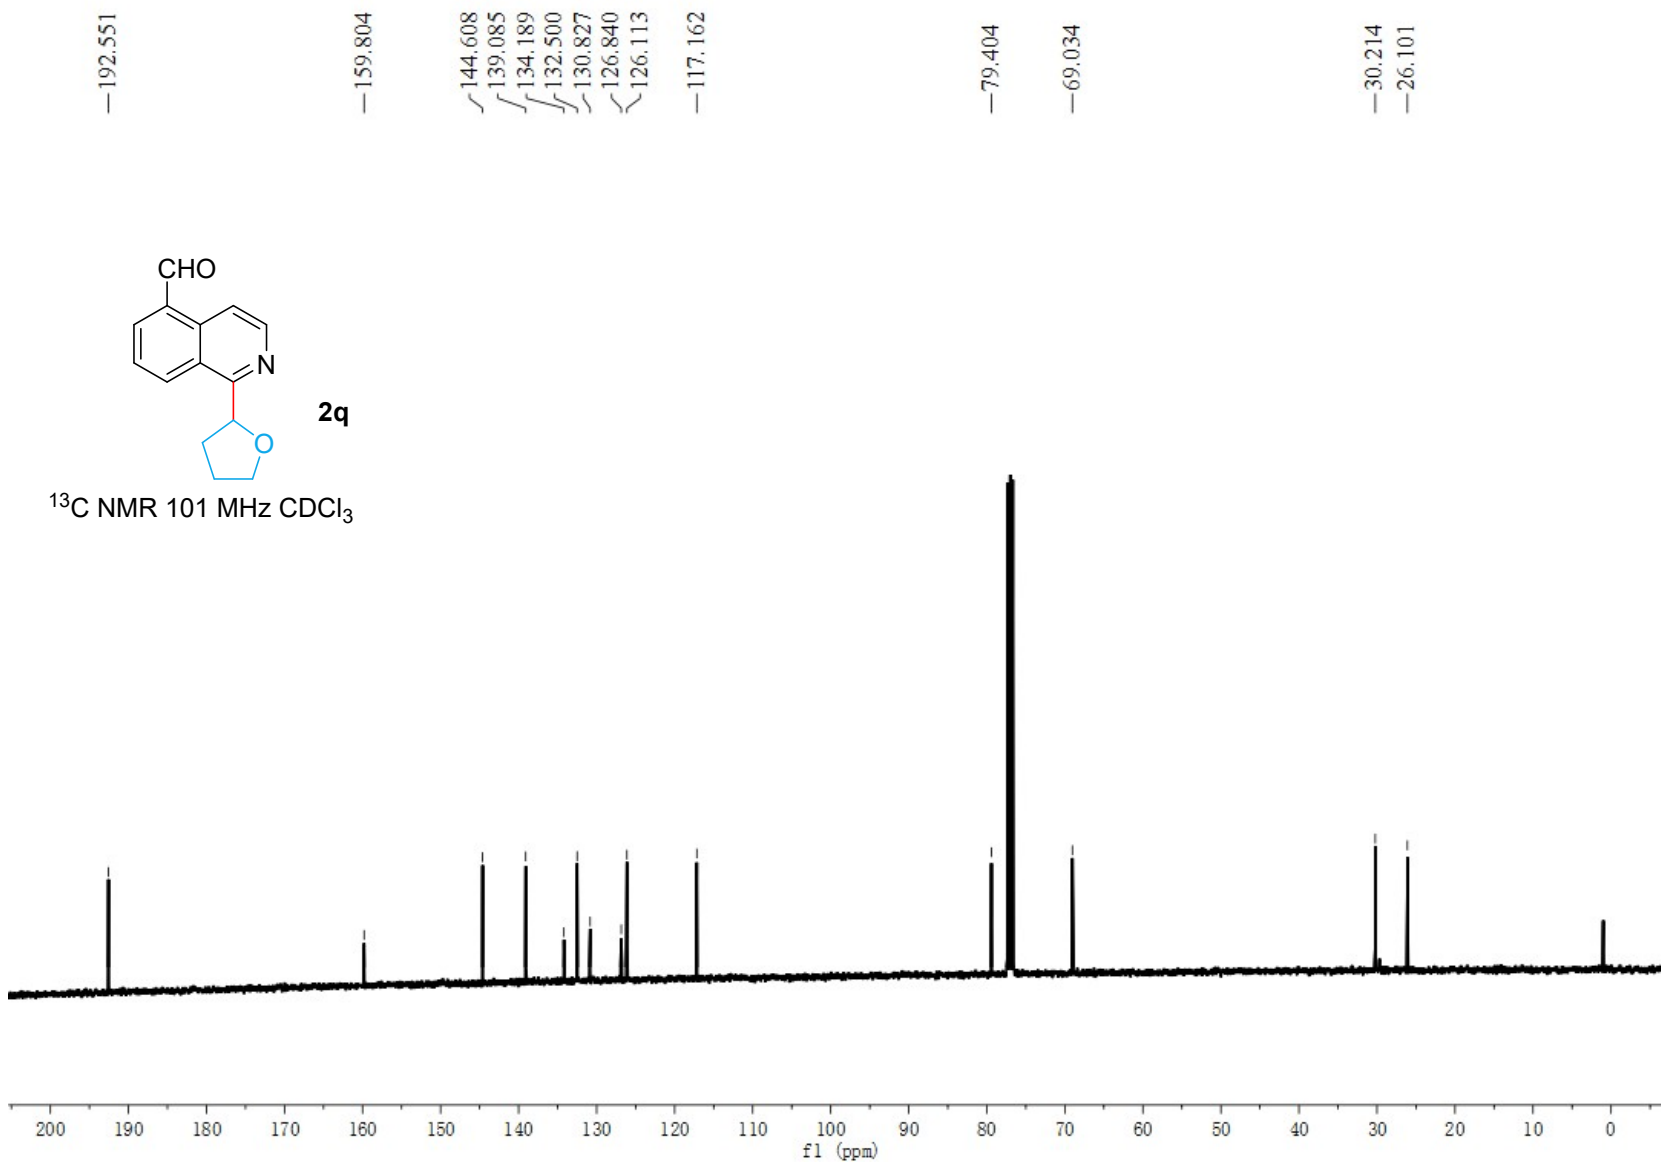

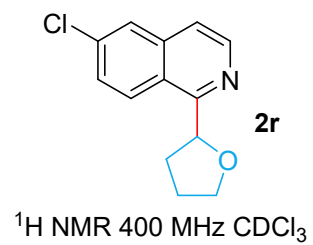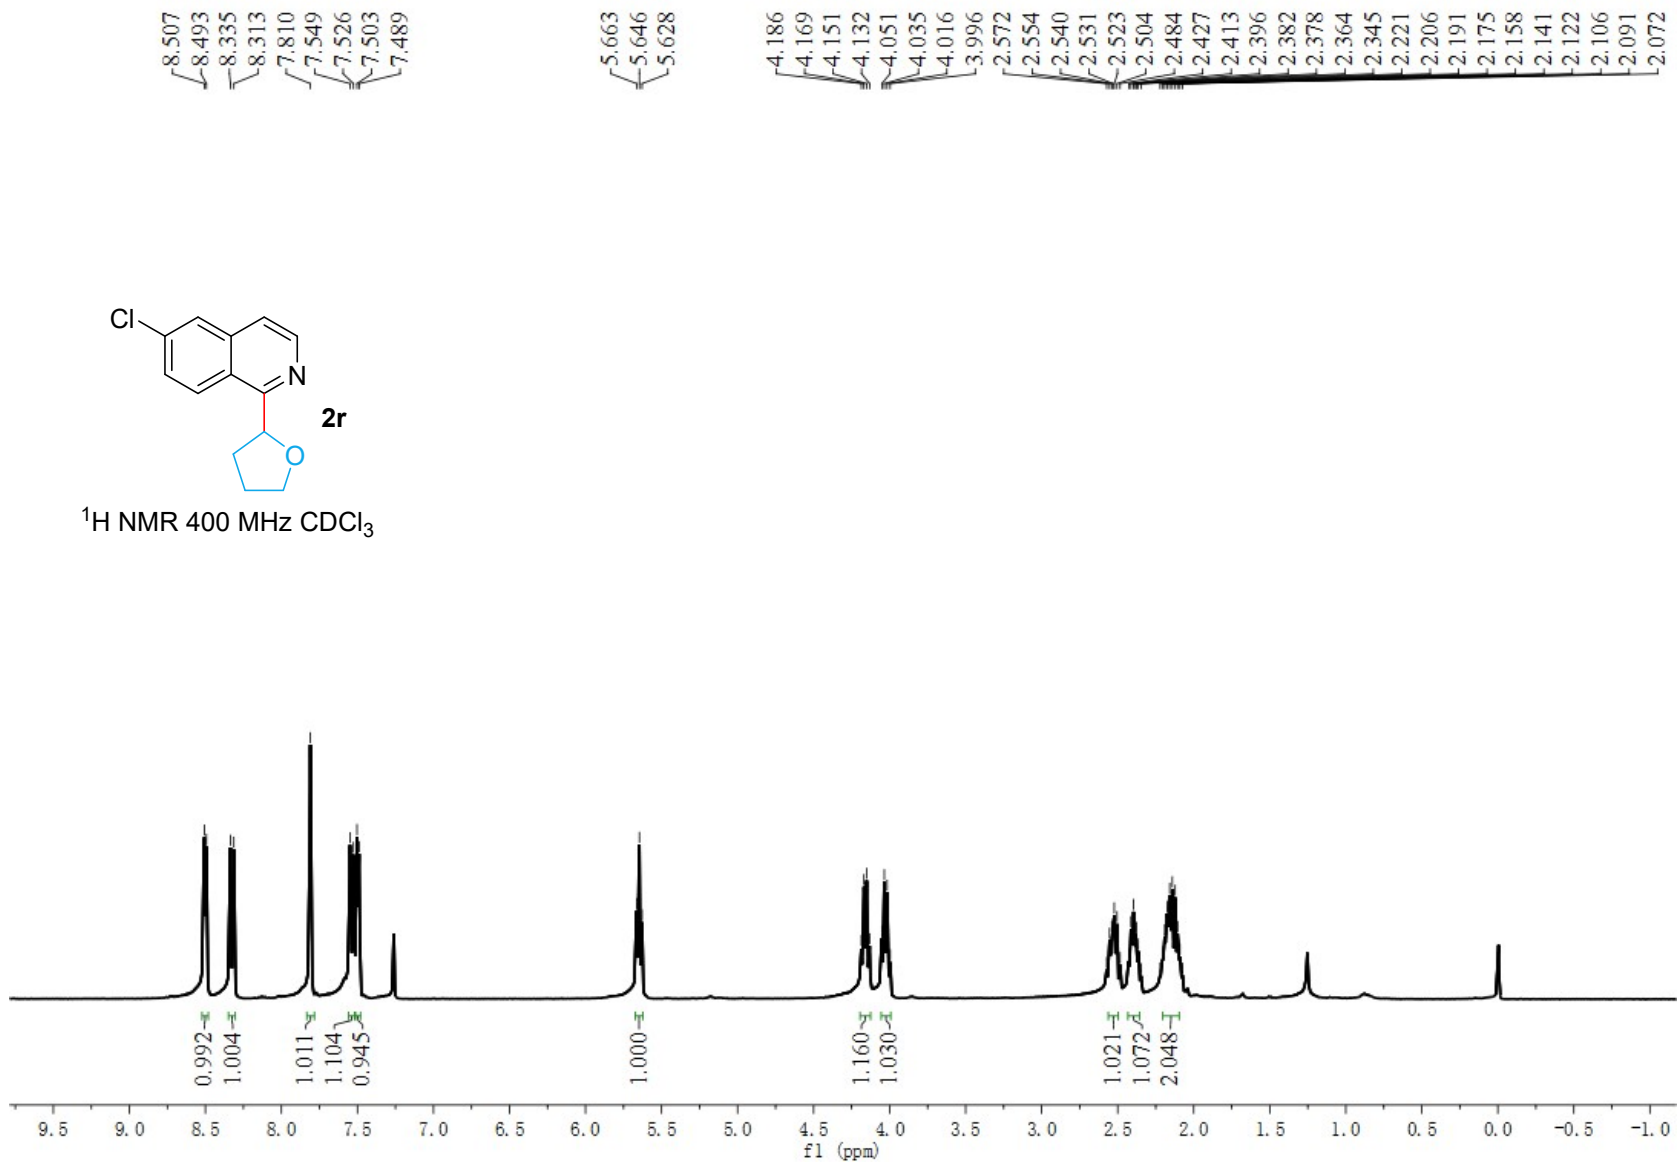

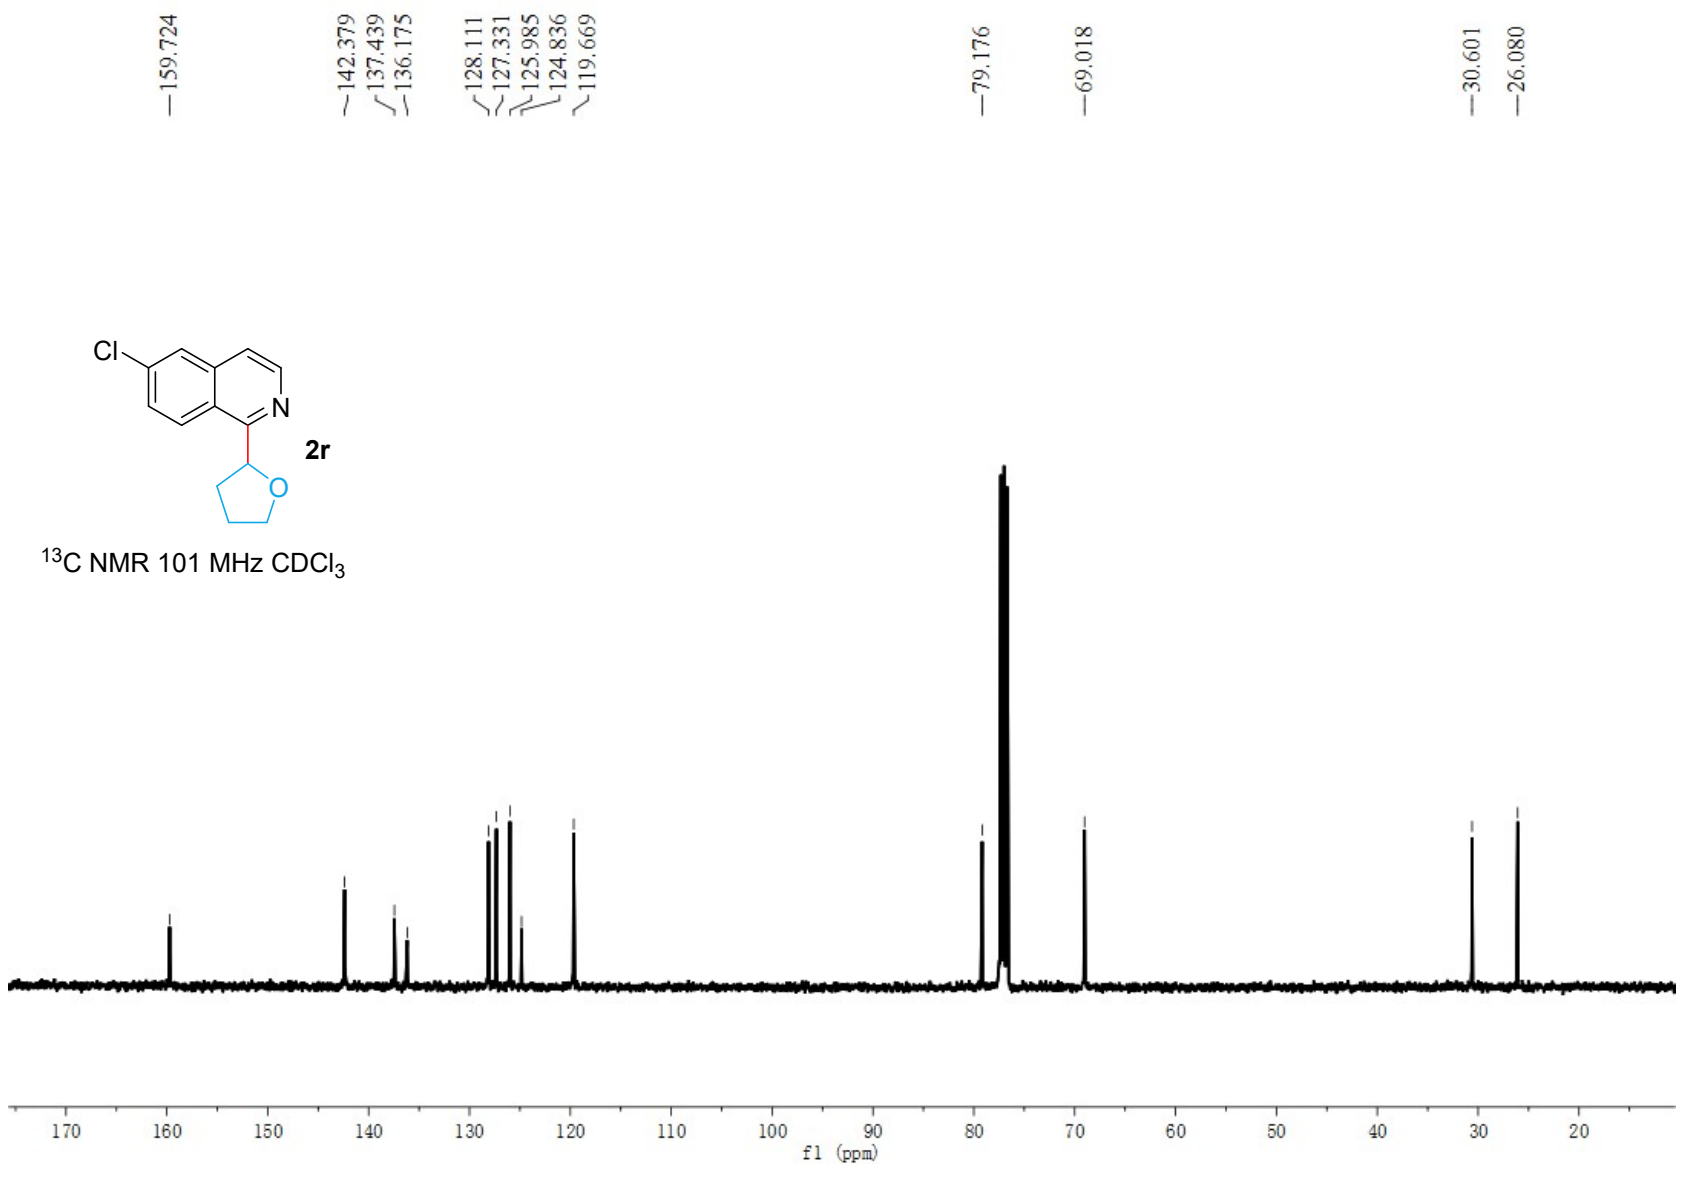

8.497  
8.483  
8.243  
8.220  
7.976  
7.973  
7.667  
7.663  
7.645  
7.640  
7.473  
7.458

5.646  
5.628  
5.610

4.167  
4.148  
4.130  
4.112  
4.039  
4.020  
4.003  
3.984  
2.564  
2.545  
2.532  
2.525  
2.514  
2.494  
2.475  
2.410  
2.391  
2.378  
2.359  
2.346  
2.328  
2.192  
2.177  
2.160  
2.144  
2.125  
2.108  
2.089  
2.077  
2.059

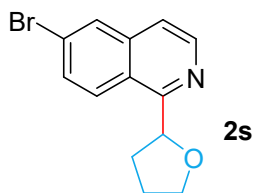

$^1\text{H NMR}$  400 MHz  $\text{CDCl}_3$

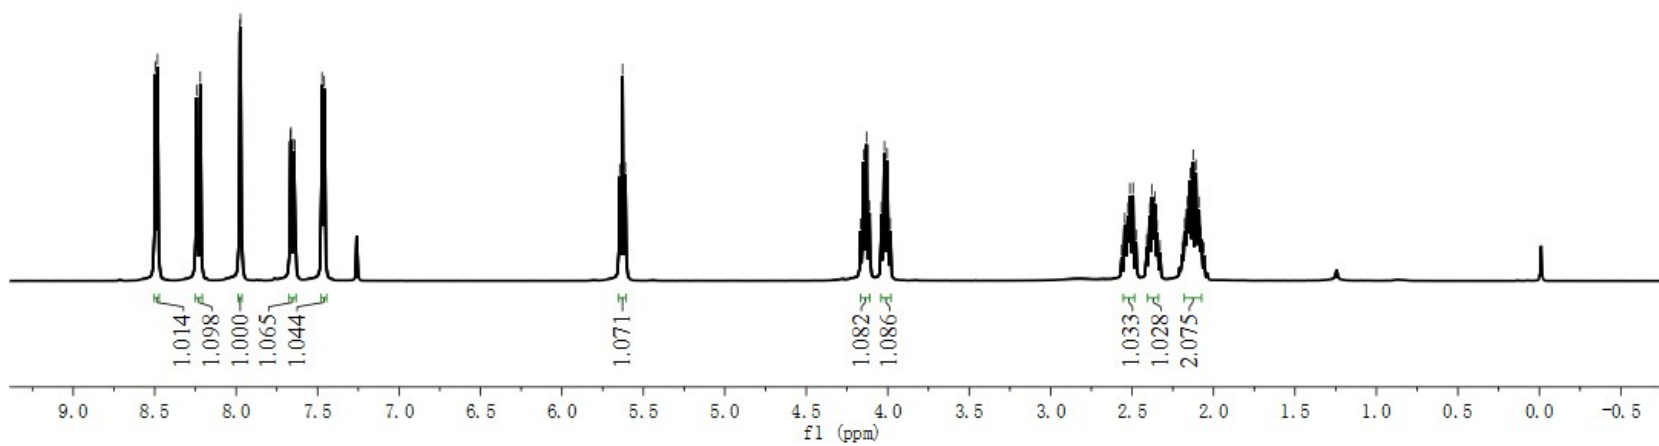

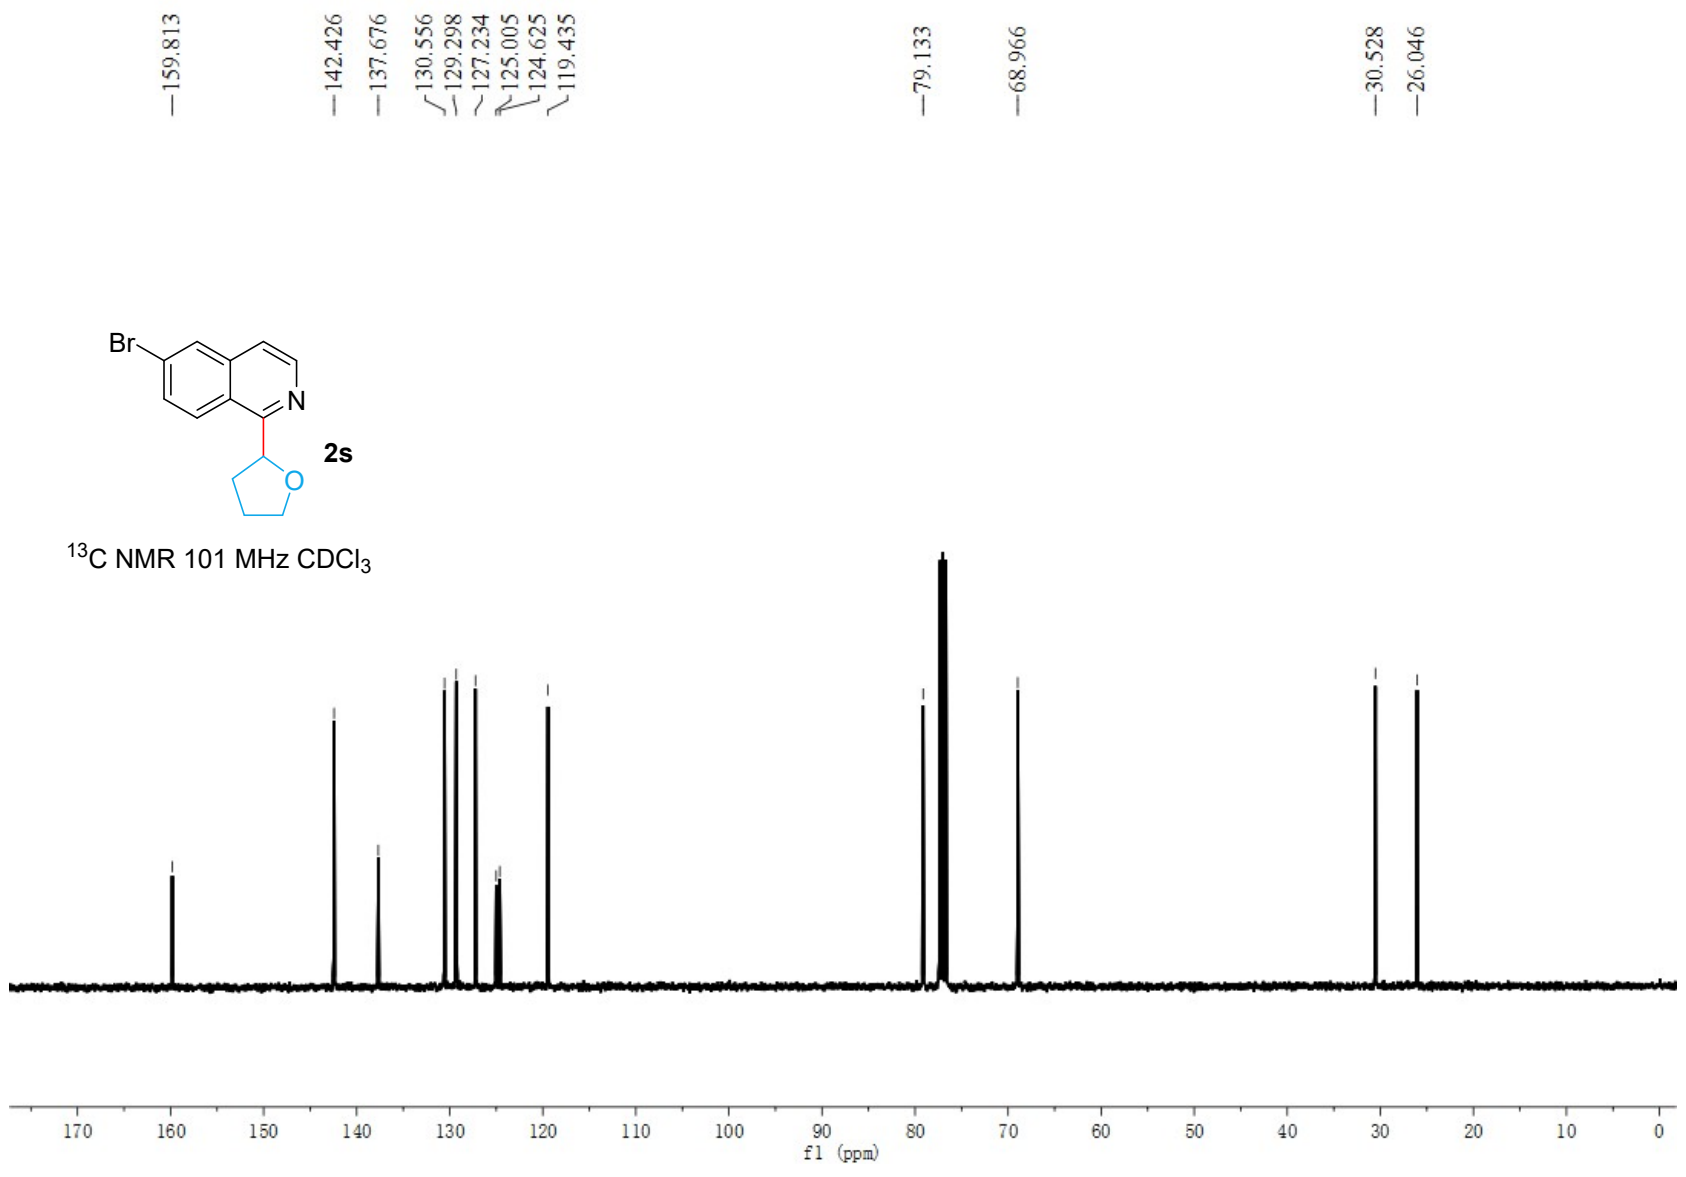

8.532  
8.512  
8.498  
7.751  
7.748  
7.729  
7.726  
7.699  
7.677  
7.545  
7.530

5.621  
5.603  
5.585

4.180  
4.161  
4.143  
4.125  
4.058  
4.038  
4.022  
4.003  
2.583  
2.564  
2.552  
2.545  
2.533  
2.514  
2.495  
2.424  
2.405  
2.392  
2.373  
2.361  
2.342  
2.223  
2.206  
2.192  
2.175  
2.159  
2.140  
2.123  
2.104  
2.092  
2.074

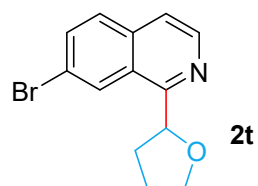

$^1\text{H NMR}$  400 MHz  $\text{CDCl}_3$

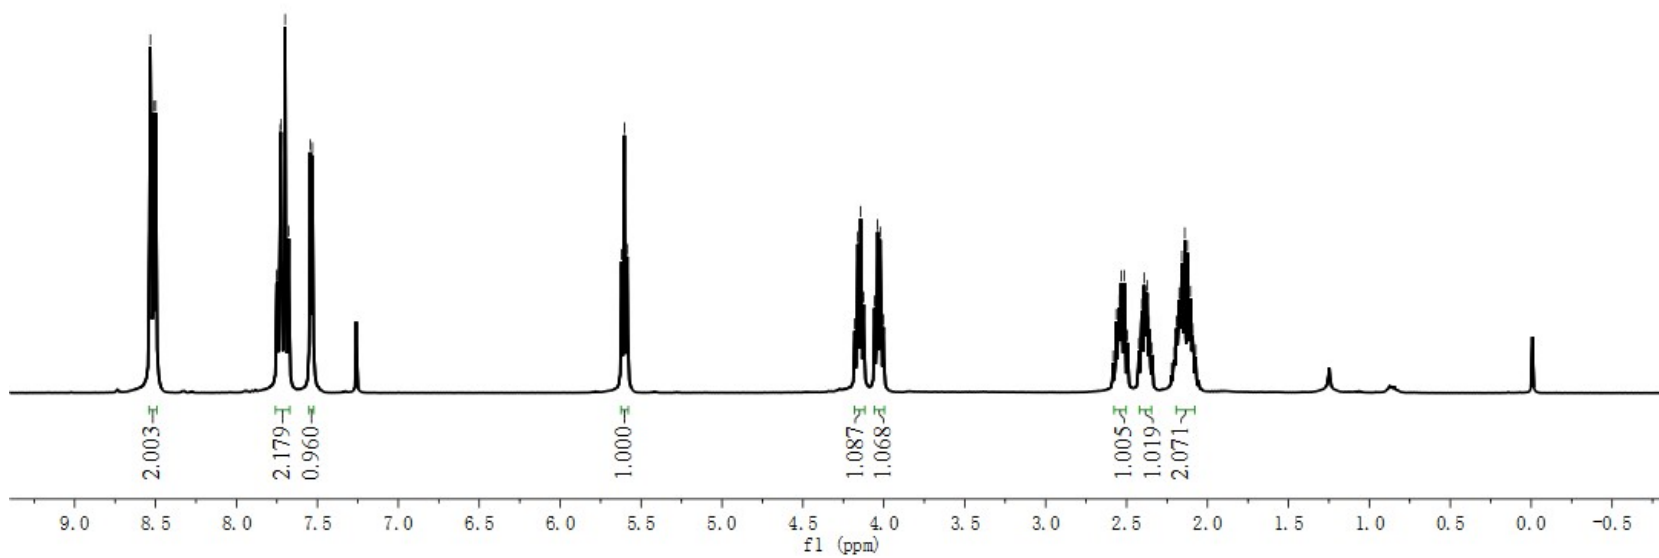

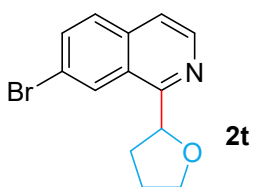

$^{13}\text{C}$  NMR 101 MHz  $\text{CDCl}_3$

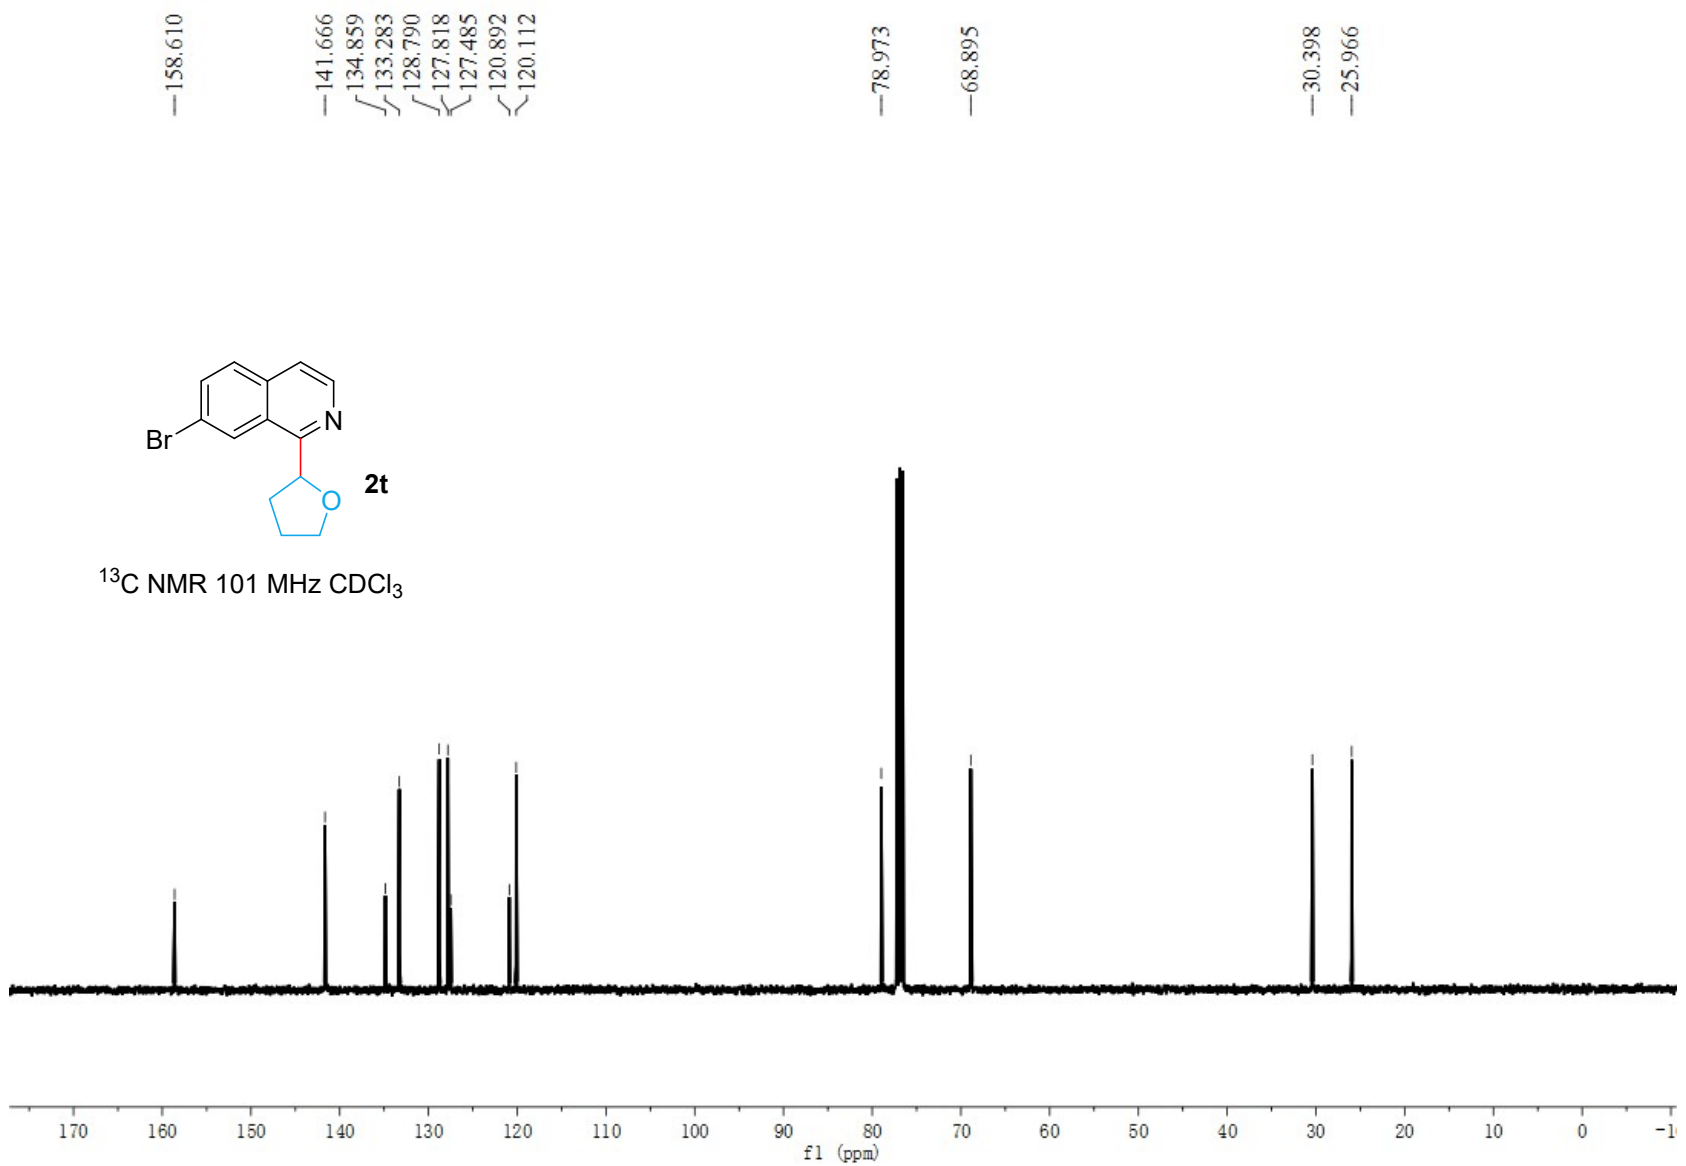



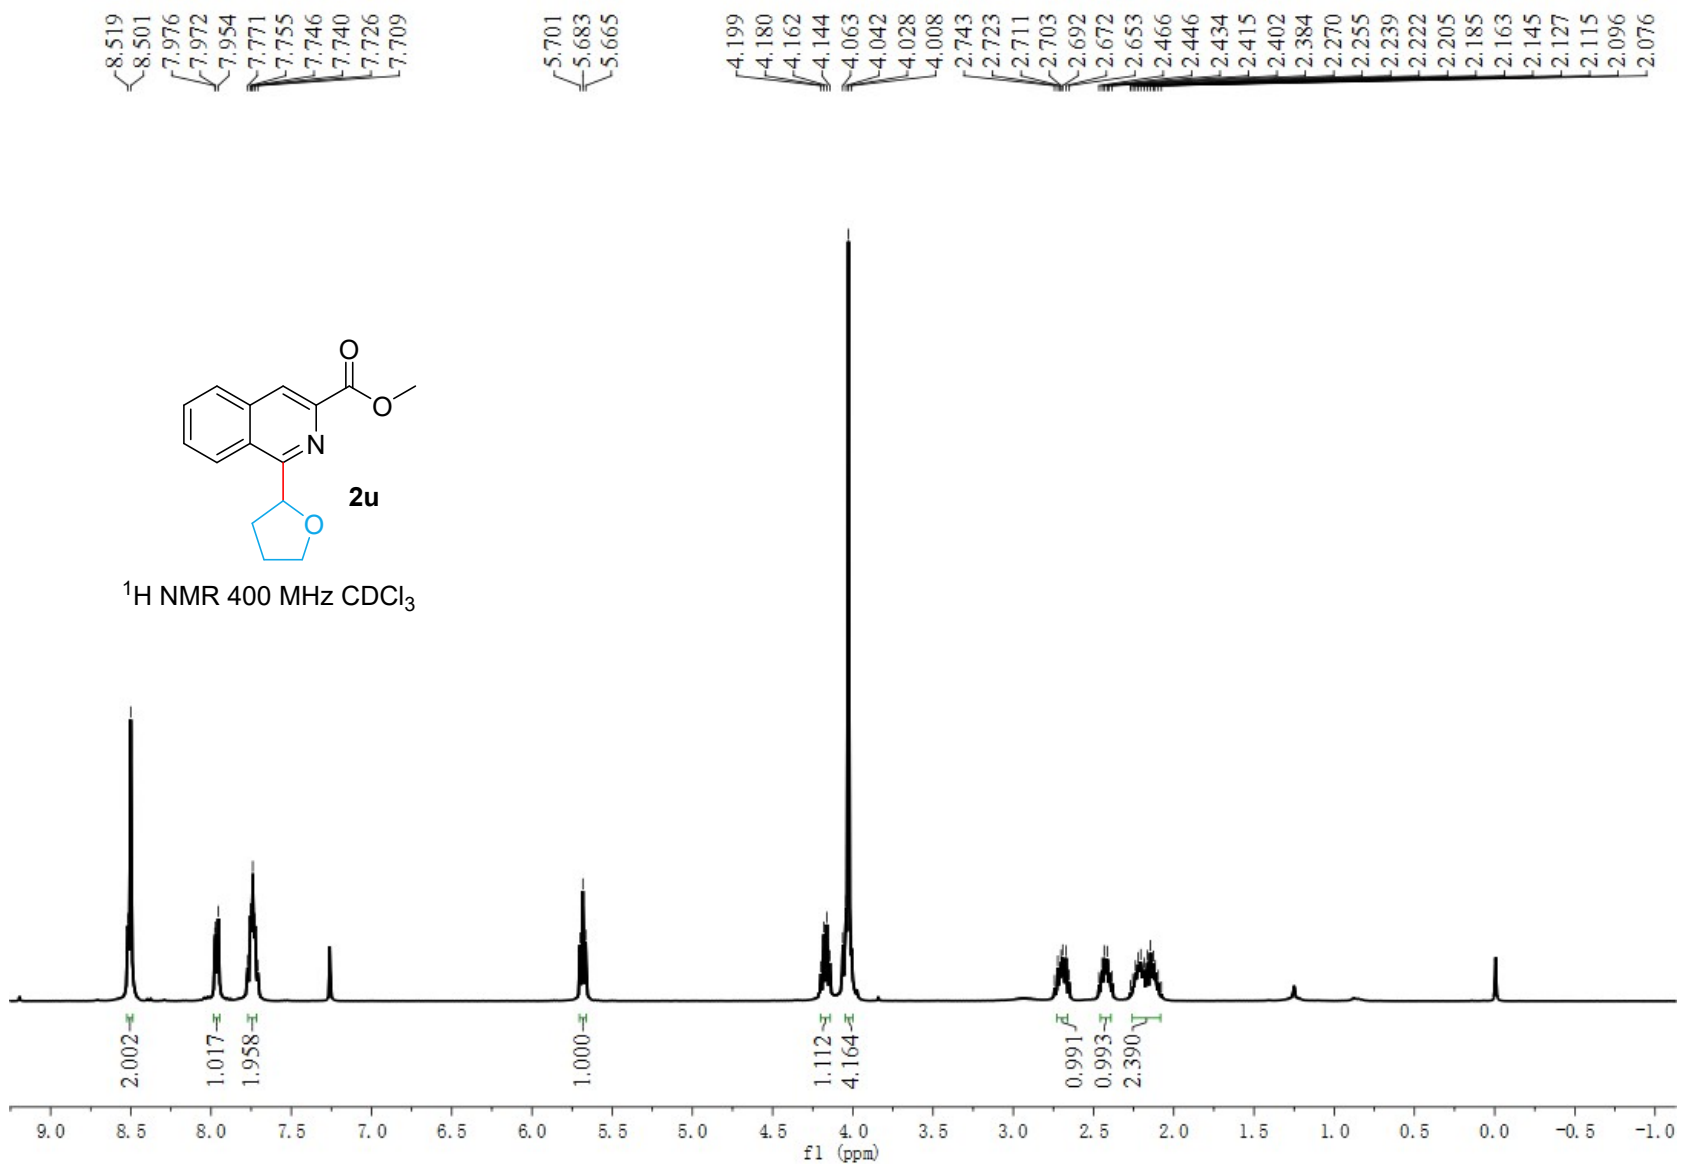

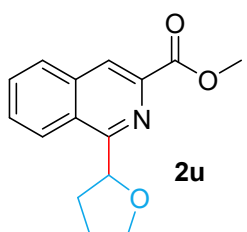

<sup>13</sup>C NMR 101 MHz CDCl<sub>3</sub>

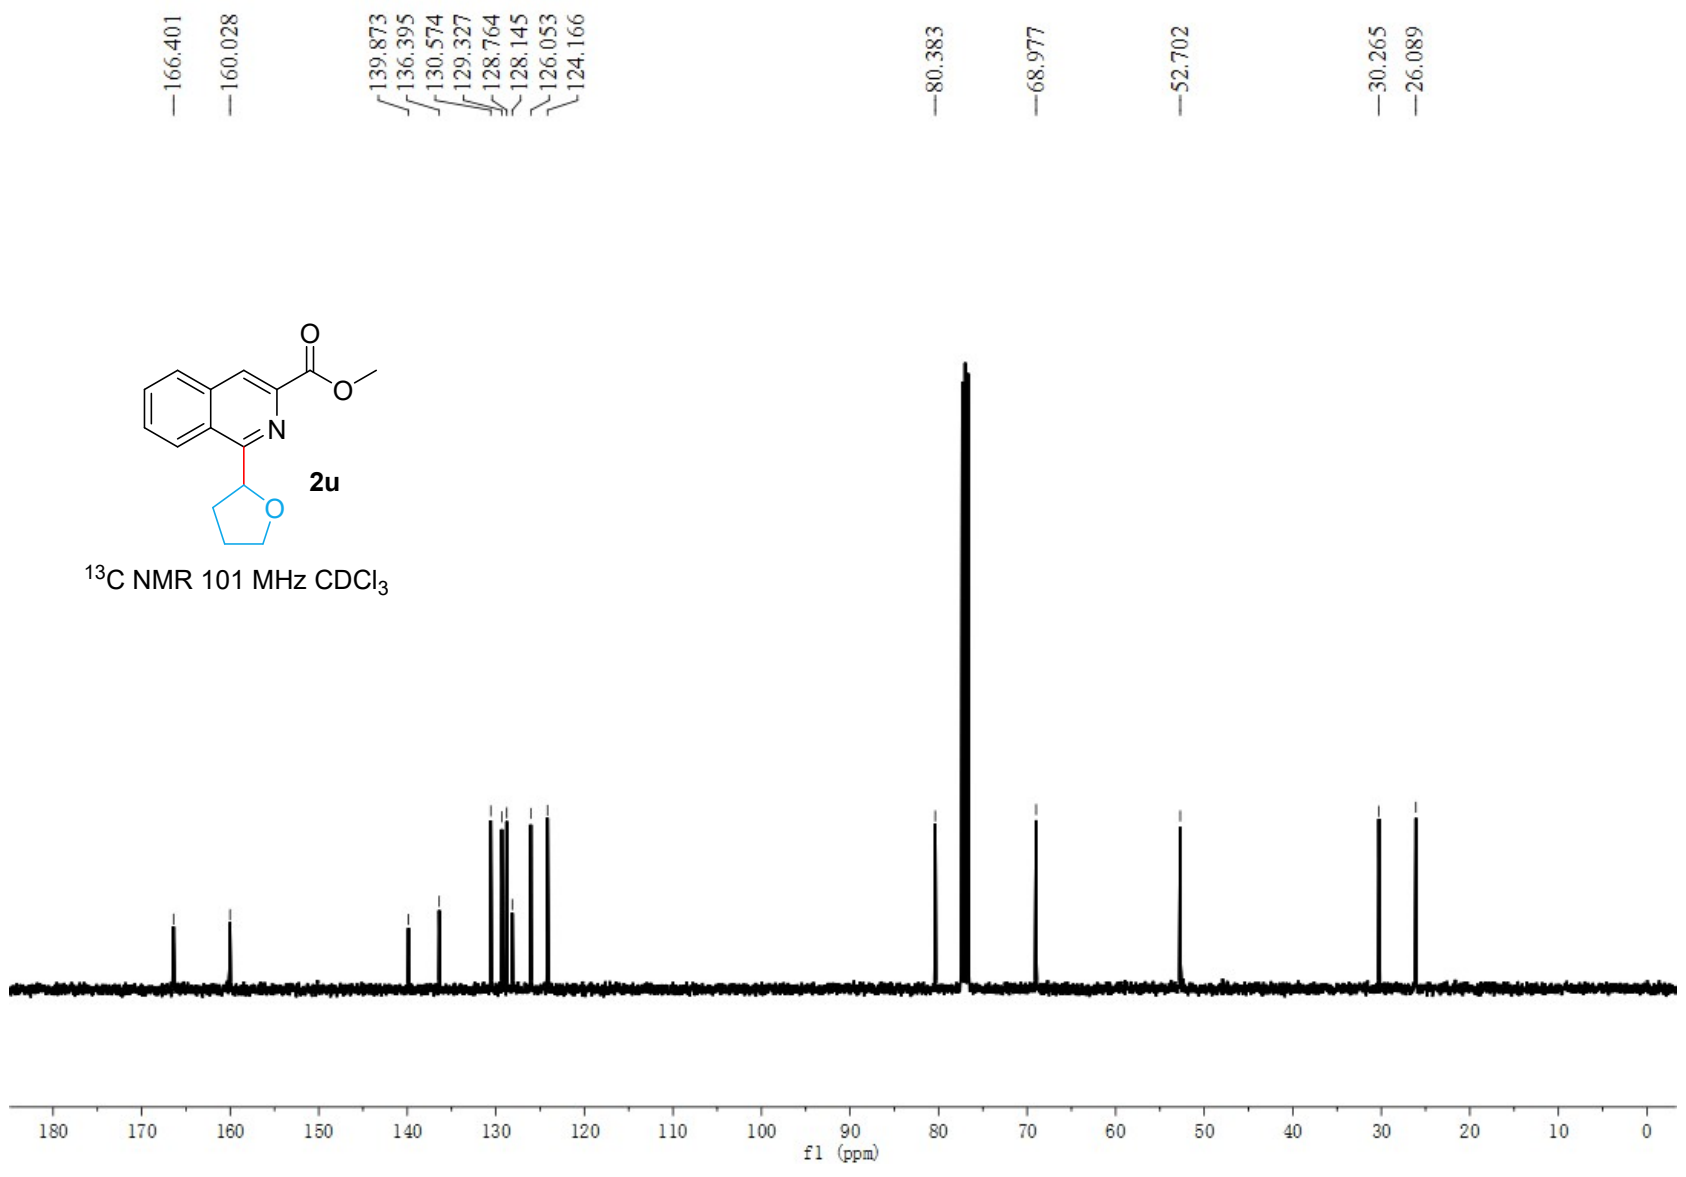

8.640  
8.619  
8.547  
8.527  
8.461  
8.440  
8.220  
8.200  
7.837  
7.819  
7.799  
7.735  
7.717  
7.708  
7.697  
7.689  
7.669  
7.658  
7.639  
7.635  
5.778  
5.761

4.243  
4.224  
4.206  
4.188  
4.100  
4.081  
4.065  
4.045  
2.793  
2.776  
2.755  
2.745  
2.725  
2.707  
2.465  
2.446  
2.431  
2.413  
2.400  
2.381  
2.229  
2.213  
2.196  
2.178  
2.161  
2.142  
2.125  
2.113  
2.094

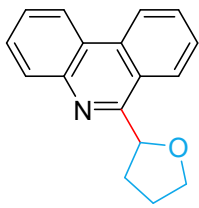

**2v**

<sup>1</sup>H NMR 400 MHz CDCl<sub>3</sub>

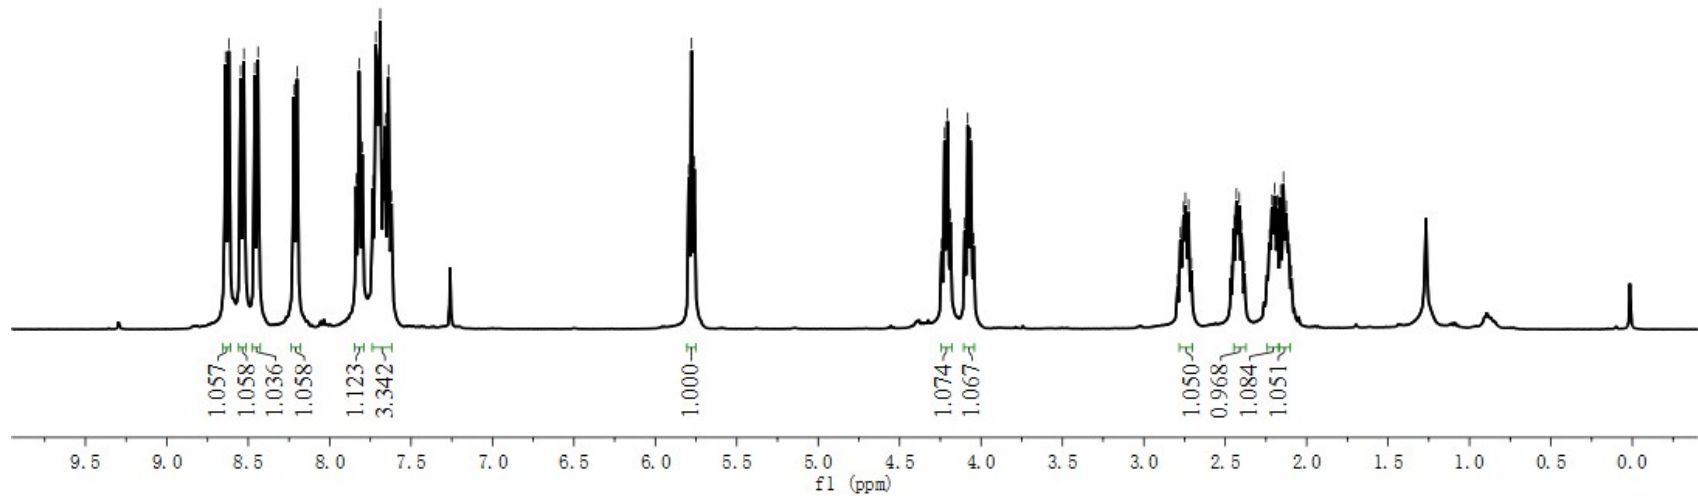

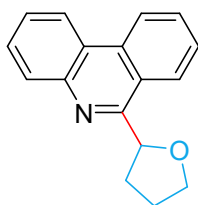

**2v**

$^{13}\text{C}$  NMR 101 MHz  $\text{CDCl}_3$

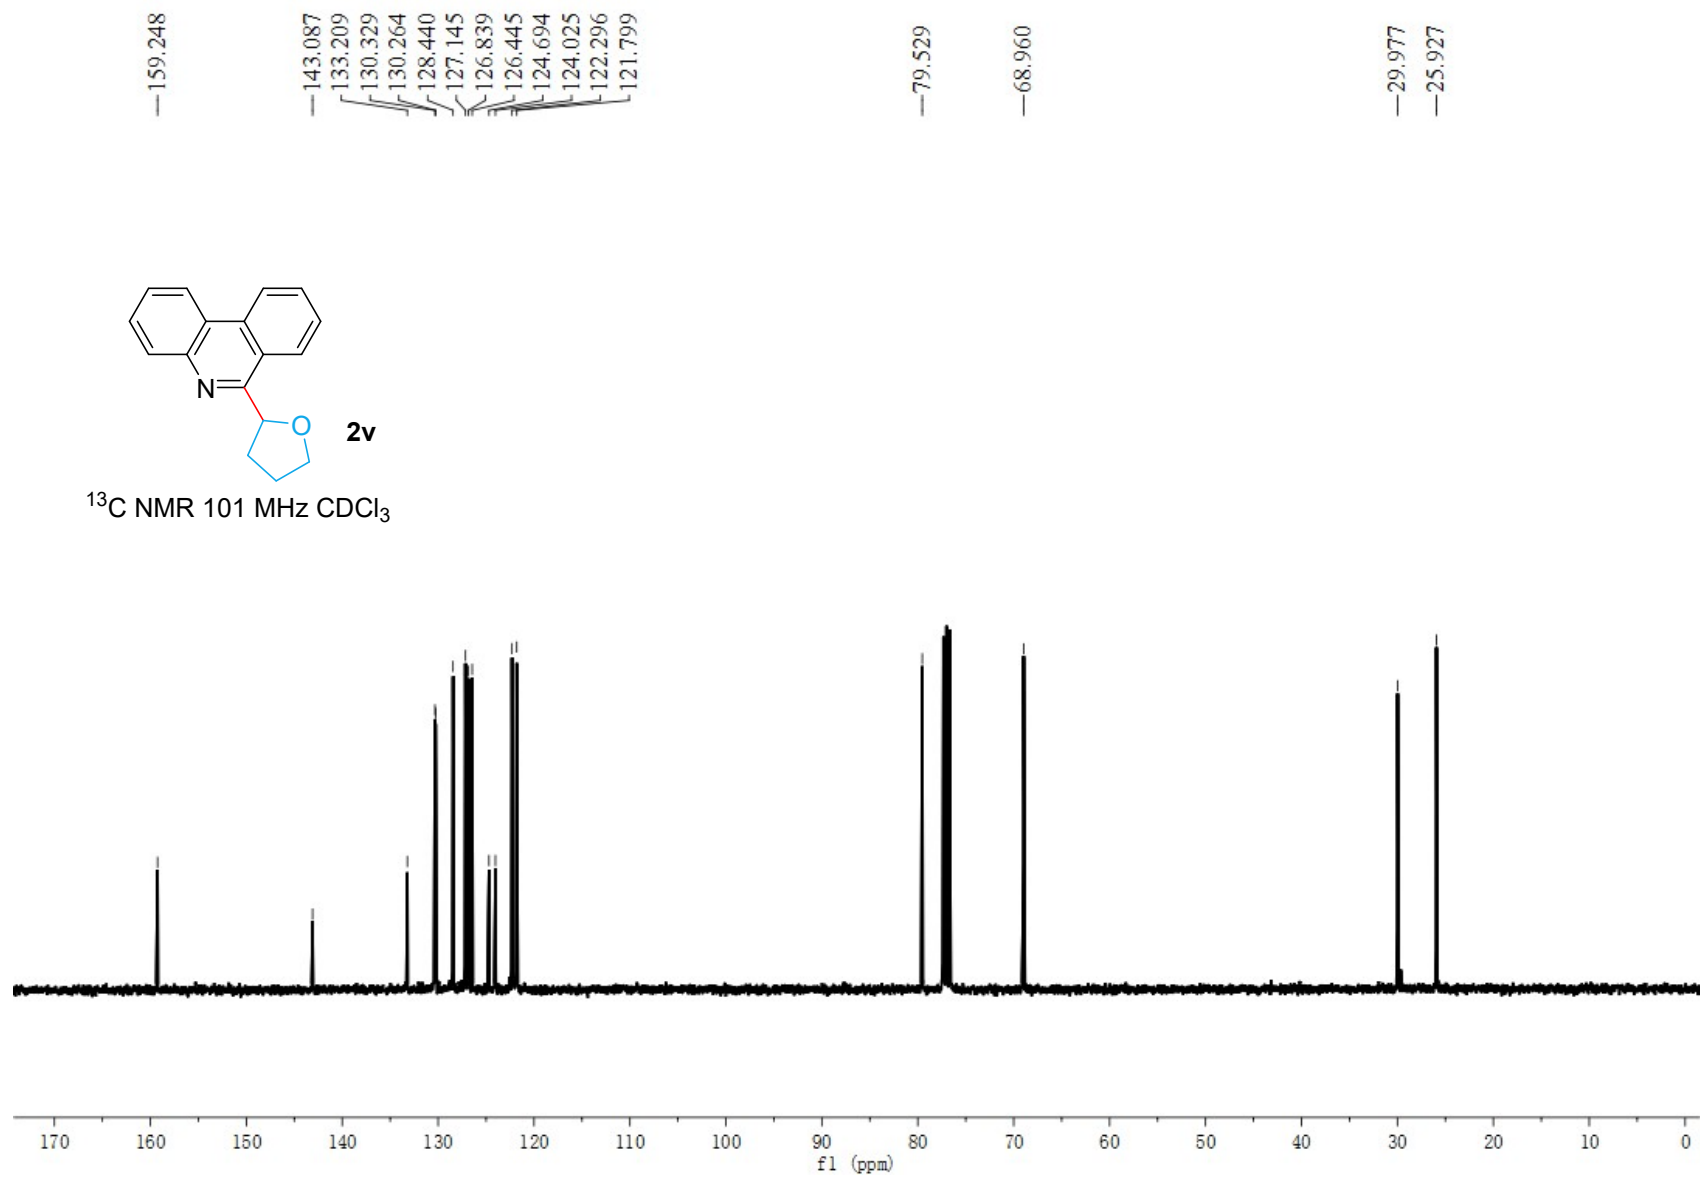

8.149  
8.145  
8.140  
8.136  
8.130  
8.128  
8.125  
8.000  
7.989  
7.984  
7.979  
7.976  
7.761  
7.758  
7.752  
7.748  
7.741  
7.737  
7.733

5.569  
5.554  
5.535

4.286  
4.269  
4.251  
4.231  
4.083  
4.067  
4.048  
4.029  
2.527  
2.508  
2.502  
2.493  
2.477  
2.269  
2.253  
2.237  
2.221  
2.167  
2.152  
2.136  
2.118  
2.108  
2.090  
2.074  
2.059

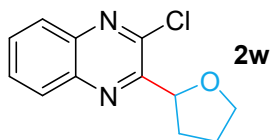

$^1\text{H}$  NMR 400 MHz  $\text{CDCl}_3$

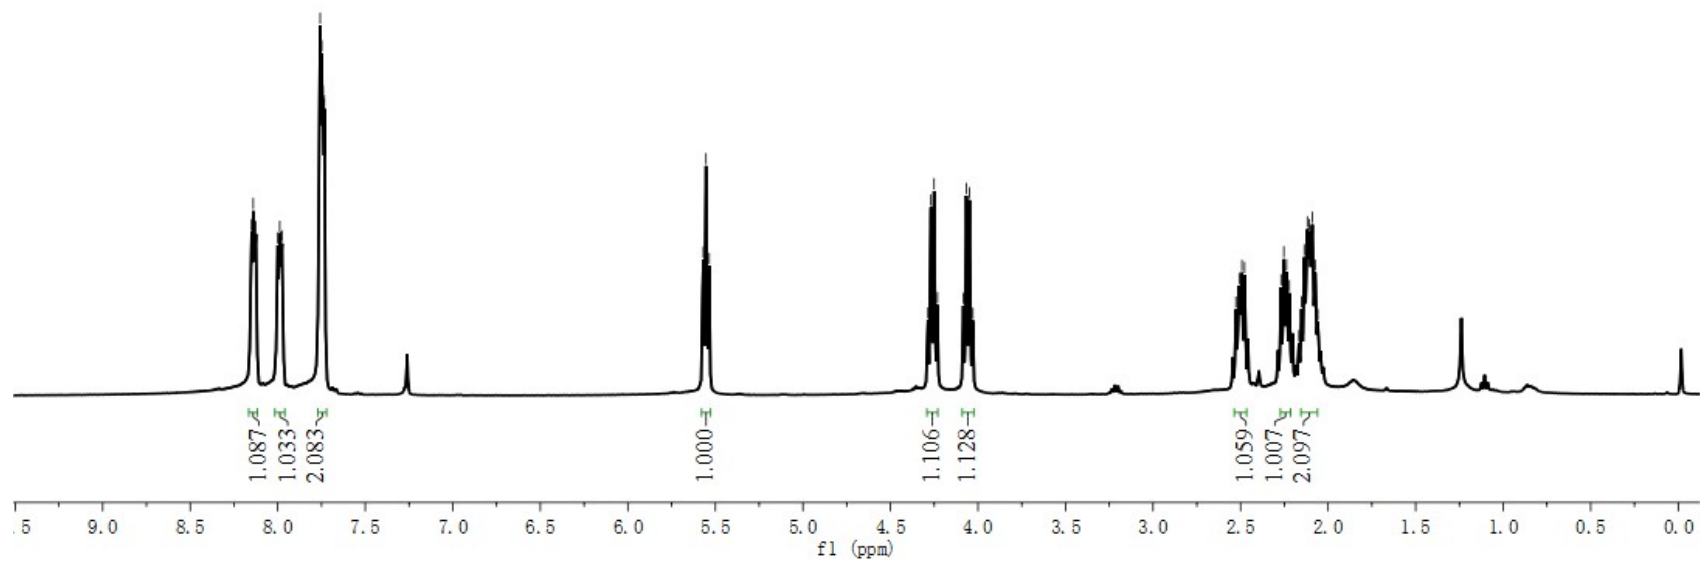

—154.472  
—145.999  
—141.299  
—140.572  
—130.580  
—130.104  
—129.257  
—128.006

—77.973

—69.425

—30.879

—25.738

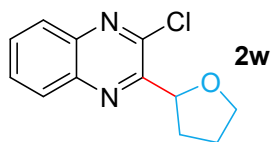

<sup>13</sup>C NMR 101 MHz CDCl<sub>3</sub>

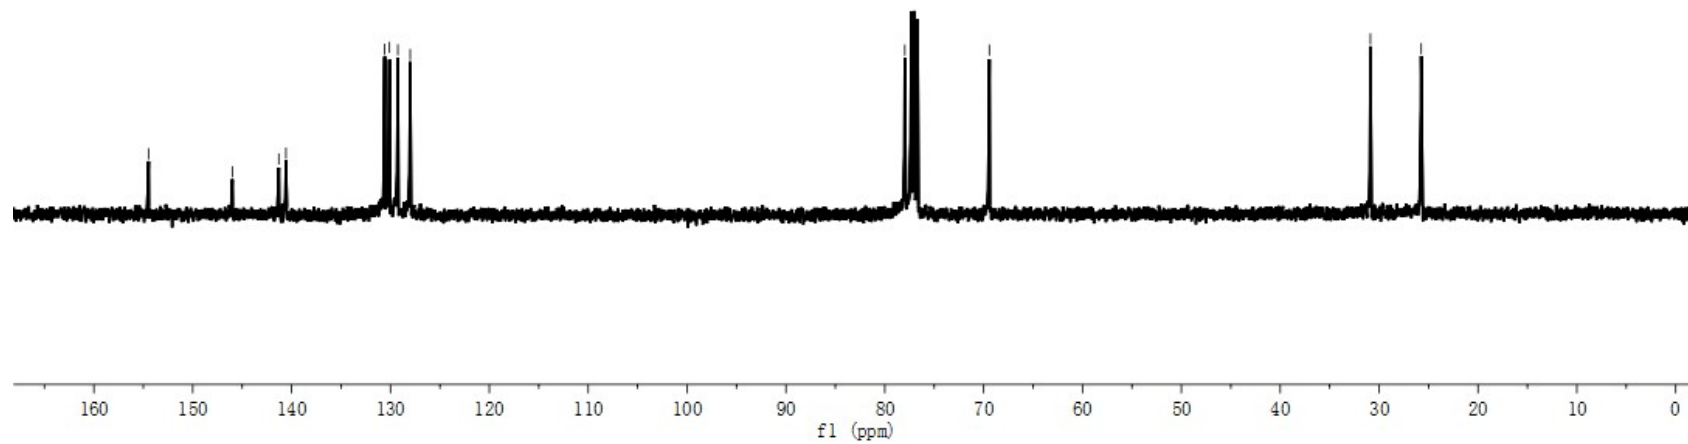

8.637  
8.624  
8.008  
7.991  
7.702  
7.489  
7.472  
7.453  
7.426  
7.408  
7.390  
7.193  
7.182

4.983  
4.965  
4.947  
4.150  
4.132  
4.112  
4.095  
4.016  
3.999  
3.979  
3.961

2.444  
2.428  
2.414  
2.397  
2.380  
2.057  
2.051  
2.039  
2.034  
2.017  
2.001  
1.985  
1.983  
1.842  
1.830  
1.824  
1.812  
1.793

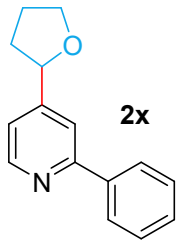

$^1\text{H NMR}$  400 MHz  $\text{CDCl}_3$

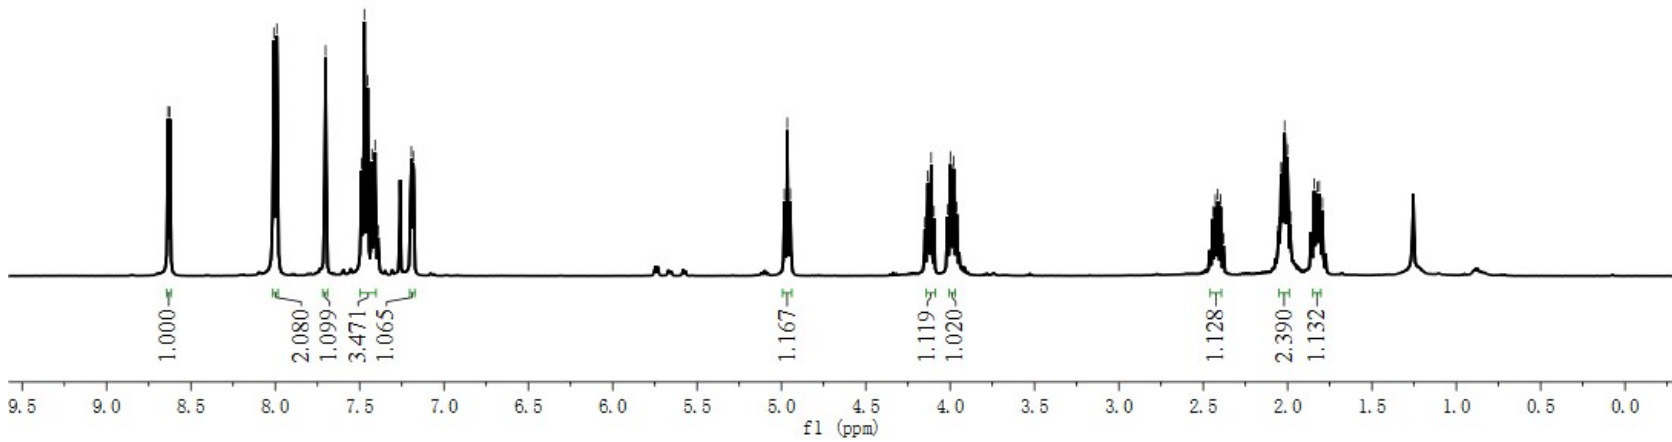

157.477  
153.698  
149.452  
139.325  
128.925  
128.671  
126.994  
119.014  
117.322  
79.248  
68.957  
34.328  
25.822

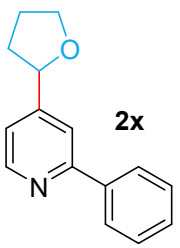

<sup>13</sup>C NMR 101 MHz CDCl<sub>3</sub>

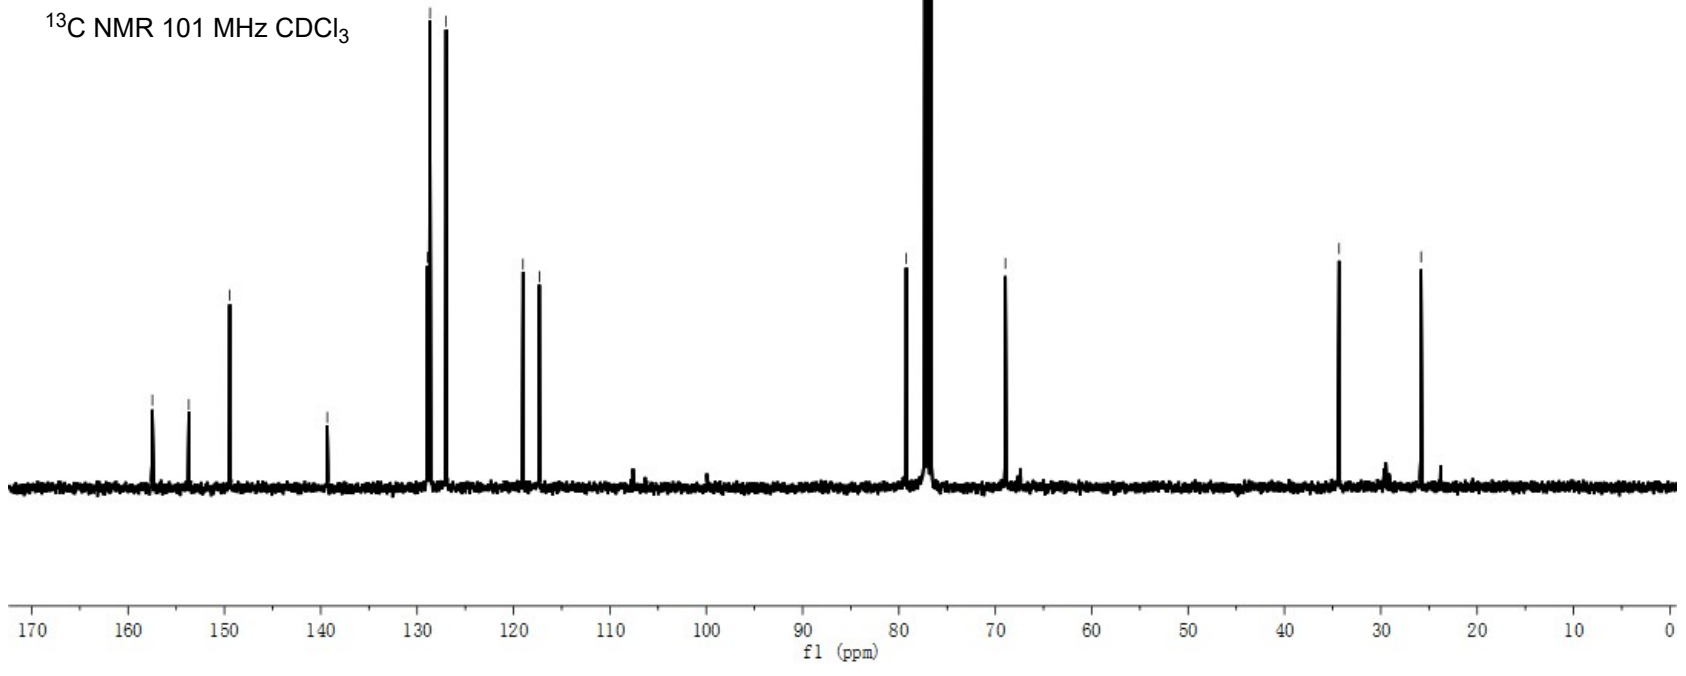

Supplement: d3ob02047a1.pdf [file d3ob02047a1.pdf]
